# Supplementary material
Source: bioRxiv or medRxiv preprint supplement (https://www.medrxiv.org/highwire/filestream/71649/field_highwire_adjunct_files/0/2020.01.30.20018432-1.pdf)
Supplement: Supplementary file [file 2020.01.30.20018432-1.pdf]

## **Family-based genome-wide association study of leprosy in Vietnam**

Chaima Gzara, Monica Dallmann-Sauer, Marianna Orlova, Nguyen Van Thuc, Vu Hong Thai,

Vinicius M. Fava, Marie-Thérèse Bihoreau, Anne Boland, Laurent Abel, Alexandre Alcaïs\*,

Erwin Schurr\*, Aurélie Cobat\*

### **Supplementary material**

Includes 11 supplementary tables and 2 supplementary figures

Table S1. Clinical characteristics of study populations from the Vietnamese family-based and case-control studies

| <b>Characteristics</b>                 | <b>Primary cohort<sup>#</sup></b> | <b>Replication cohort</b> |                    |
|----------------------------------------|-----------------------------------|---------------------------|--------------------|
|                                        | <b>Affected offspring</b>         | <b>Cases</b>              | <b>Controls</b>    |
| <i>N</i>                               | 622                               | 1181                      | 668                |
| <i>N</i> affected by status (MB/PB/NA) | 202/327/93                        | 584/536/61                | –                  |
| Age in years*: mean (SD, range)        | 18.6 (7.8, 13-23)                 | 23.0 (8.0, 17-29)         | 37.9 (12.1, 28-48) |
| % Males                                | 69.3                              | 66.4                      | 44.3               |

\* Age at diagnosis for leprosy cases and at enrollment for controls

# the 622 affected offspring of the primary family-based cohort belonged to 481 families including 379 trios (one affected child and the two parents), 80 multiplex families with at least two affected children and both parents, nine multiplex families with at least two affected children and one parent, five multiplex families with at least two affected children, one parent and at least one unaffected child, one multiplex families with four affected children and more than two unaffected children but no parents, six families composed of one affected child, one parent and at least one unaffected child and one three-generational family composed of four affected and four unaffected children.

Table S2. LD-based clumping of genome-wide suggestive non-HLA hits

| CHR | Lead SNP    | Clumped SNPs                                                           | SNP genotyped in replication | Discovery GWAS |                   |                        | Replication                      |                   |       |
|-----|-------------|------------------------------------------------------------------------|------------------------------|----------------|-------------------|------------------------|----------------------------------|-------------------|-------|
|     |             |                                                                        |                              | MAF            | OR* [95% CI]      | P                      | MAF                              | OR** [95% CI]     | P#    |
| 4   | rs72679464  | NONE                                                                   | rs72679464                   | 0.058          | 0.36 [-0.09-0.81] | 9.02x10 <sup>-06</sup> | <i>Failed call rate &lt; 95%</i> |                   |       |
| 5   | rs329308    | rs329311, rs329316                                                     | rs329308                     | 0.16           | 1.59 [1.34-1.84]  | 6.22x10 <sup>-06</sup> | 0.16                             | 1.00 ]0 - 1.16]   | 0.48  |
| 9   | rs72745332  | rs138270577, rs72745331, rs7873495, rs7846860, rs72745334, rs139715851 | rs72745332                   | 0.097          | 0.46 [0.17-0.75]  | 1.37x10 <sup>-06</sup> | <i>Failed call rate &lt; 95%</i> |                   |       |
| 10  | rs10749270  | rs12245921                                                             | rs12245921                   | 0.35           | 0.68 [0.49-0.86]  | 8.61x10 <sup>-06</sup> | 0.36                             | -                 | >0.5  |
| 11  | rs10898992  | NONE                                                                   | rs10898992                   | 0.105          | 0.52 [0.23-0.8]   | 9.88x10 <sup>-06</sup> | 0.11                             | -                 | >0.5  |
| 14  | rs572428555 | rs61982614, rs34179372                                                 | rs34179372                   | 0.083          | 2.24 [1.87-2.61]  | 4.92x10 <sup>-07</sup> | 0.07                             | 1.13 [0.91 - Inf[ | 0.175 |
| 21  | rs7281793   | rs9981205, rs7280840                                                   | rs7281793                    | 0.461          | 0.66 [0.48-0.84]  | 3.69x10 <sup>-06</sup> | 0.46                             | 0.98 ]0 - 1.10]   | 0.376 |
| 21  | rs75025892  | rs4817512                                                              | rs75025892                   | 0.271          | 0.64 [0.44-0.83]  | 2.68x10 <sup>-06</sup> | 0.26                             | 0.98 ]0 - 1.11]   | 0.387 |

OR = odds ratio; CI = confidence interval

<sup>s</sup> positions are given according to the hg19 genome build

\* with respect to the minor allele

# one-tailed test

Table S3. Previously published genome-wide significant SNPs outside the HLA region

|                              |          |                  |                              | Original study |             |                              |            | Vietnamese discovery GWAS |              |                              |
|------------------------------|----------|------------------|------------------------------|----------------|-------------|------------------------------|------------|---------------------------|--------------|------------------------------|
| SNP                          | CHR      | Position         | Gene mapped                  | m/M            | Risk Allele | <i>P</i>                     | ref        | Risk Allele               | Information  | <i>P</i>                     |
| <b>rs3762318</b>             | <b>1</b> | <b>67597119</b>  | <b><i>IL23R</i></b>          | G/A            | A           | <b>3.27x10<sup>-11</sup></b> | <b>(1)</b> | A                         | 1            | <b>4.41x10<sup>-03</sup></b> |
| rs76418789                   | 1        | 67648596         | <i>IL23R</i>                 | A/G            | A           | 1.03x10 <sup>-10</sup>       | (2)        | A                         | 0.557        | 4.60x10 <sup>-01</sup>       |
| rs2735591                    | 1        | 85744472         | <i>BCL10</i>                 | G/A            | A           | 1.03x10 <sup>-09</sup>       | (3)        | G                         | 1            | 0.87                         |
| rs146466242                  | 1        | 152275298        | <i>FLG</i>                   | A/T            | A           | 3.39x10 <sup>-12</sup>       | (2)        | T                         | 0.933        | 6.51x10 <sup>-01</sup>       |
| <b>rs2221593</b>             | <b>1</b> | <b>212873431</b> | <b><i>BATF3</i></b>          | T/C            | T           | <b>3.09x10<sup>-08</sup></b> | <b>(4)</b> | T                         | 1            | <b>1.94x10<sup>-04</sup></b> |
| <b>rs2058660</b>             | <b>2</b> | <b>103054449</b> | <b><i>IL18RAP/IL18R1</i></b> | A/G            | A           | <b>4.57x10<sup>-19</sup></b> | <b>(5)</b> | A                         | 0.999        | <b>5.66x10<sup>-03</sup></b> |
| rs6807915                    | 3        | 12313846         | <i>SYN2</i>                  | C/T            | T           | 1.94x10 <sup>-08</sup>       | (6)        | C                         | 0.984        | 3.71x10 <sup>-01</sup>       |
| rs145562243 <sup>£</sup>     | 3        | 48719549         | <i>NCKIPSD</i>               | T/C            | T           | 1.71x10 <sup>-09</sup>       | (2)        | -                         | -            | -                            |
| rs5743618                    | 4        | 38798648         | <i>TLR1</i>                  | C/A            | A           | 1.70x10 <sup>-09</sup>       | (7)        | C                         | 0.67         | 9.85x10 <sup>-01</sup>       |
| rs73058713                   | 5        | 20374213         | intergenic                   | A/C            | A           | 9.54x10 <sup>-09</sup>       | <b>(4)</b> | C                         | 0.984        | 2.14x10 <sup>-01</sup>       |
| <b>rs6871626<sup>#</sup></b> | <b>5</b> | <b>158826792</b> | <b><i>IL12B</i></b>          | A/C            | C           | <b>3.95x10<sup>-18</sup></b> | <b>(5)</b> | C                         | <b>0.778</b> | <b>5.12x10<sup>-04</sup></b> |
| rs2275606                    | 6        | 146918950        | <i>RAB32</i>                 | A/G            | A           | 3.94x10 <sup>-14</sup>       | (1)        | A                         | 1            | 1.99x10 <sup>-01</sup>       |
| rs4720118                    | 7        | 33469241         | <i>BBS9</i>                  | T/C            | T           | 3.85x10 <sup>-10</sup>       | (6)        | T                         | 0.998        | 1.85x10 <sup>-01</sup>       |
| rs55894533                   | 8        | 11749242         | <i>CTSB</i>                  | C/A            | C           | 5.07x10 <sup>-11</sup>       | (6)        | A                         | 0.964        | 3.53x10 <sup>-01</sup>       |
| rs13259978                   | 8        | 17396415         | <i>SLC7A2</i>                | C/G            | C           | 1.74x10 <sup>-08</sup>       | (8)        | G                         | 0.907        | 8.96x10 <sup>-01</sup>       |
| rs160451                     | 8        | 90662941         | <i>RIPK2</i>                 | T/C            | C           | 7.45x10 <sup>-12</sup>       | <b>(4)</b> | C                         | 0.999        | 8.33x10 <sup>-01</sup>       |
| rs42490                      | 8        | 90778513         | <i>RIPK2</i>                 | G/A            | G           | 1.38x10 <sup>-16</sup>       | (9)        | G                         | 1            | 3.15x10 <sup>-02</sup>       |
| rs10100465                   | 8        | 118626279        | <i>Mx10D30</i>               | A/G            | G           | 2.85x10 <sup>-11</sup>       | (6)        | G                         | 1            | 1.39x10 <sup>-01</sup>       |
| rs6478108                    | 9        | 117558703        | <i>TNFSF15</i>               | G/A            | A           | 3.39x10 <sup>-21</sup>       | (9)        | C                         | 1            | 3.88x10 <sup>-02</sup>       |
| rs10817758                   | 9        | 118143933        | <i>DECI</i>                  | T/C            | T           | 1.15x10 <sup>-08</sup>       | <b>(4)</b> | T                         | 1            | 3.54x10 <sup>-01</sup>       |
| rs149308743                  | 9        | 139258965        | <i>CARD9</i>                 | T/C            | T           | 2.09x10 <sup>-08</sup>       | (2)        | T                         | 0.514        | 9.79x10 <sup>-01</sup>       |
| rs58600253                   | 10       | 64507904         | intergenic                   | T/C            | T           | 3.02x10 <sup>-12</sup>       | <b>(4)</b> | T                         | 0.987        | 3.17x10 <sup>-01</sup>       |
| rs780668                     | 10       | 73111408         | <i>SLC29A3</i>               | T/C            | T           | 2.17x10 <sup>-09</sup>       | (2)        | T                         | 1            | 4.46x10 <sup>-02</sup>       |

|                  |           |                 |                     |            |          |                              |      |          |       |                              |
|------------------|-----------|-----------------|---------------------|------------|----------|------------------------------|------|----------|-------|------------------------------|
| rs663743         | 11        | 64107735        | <i>CCDC88B</i>      | A/G        | A        | 8.84x10 <sup>-14</sup>       | (4)  | A        | 0.985 | 2.14x10 <sup>-02</sup>       |
| rs925368         | 12        | 110390979       | <i>GIT2</i>         | C/T        | C        | 9.18x10 <sup>-17</sup>       | (8)  | C        | 0.877 | 7.80x10 <sup>-01</sup>       |
| rs671            | 12        | 112241766       | <i>ALDH2</i>        | A/G        | A        | 2.00x10 <sup>-20</sup>       | (8)  | A        | 1     | 2.33x10 <sup>-01</sup>       |
| <b>rs3764147</b> | <b>13</b> | <b>44457925</b> | <b><i>LACCI</i></b> | <b>A/G</b> | <b>G</b> | <b>3.72x10<sup>-54</sup></b> | (9)  | <b>G</b> | 1     | <b>6.56x10<sup>-05</sup></b> |
| rs8002861        | 13        | 44474517        | <i>LACCI</i>        | G/A        | A        | 1.07x10 <sup>-12</sup>       | (4)  | A        | 1     | 5.70x10 <sup>-02</sup>       |
| rs142179458      | 14        | 62203623        | <i>HIF1A</i>        | G/A        | A        | 4.95x10 <sup>-09</sup>       | (10) | A        | 0.687 | 1.52x10 <sup>-01</sup>       |
| rs77061563       | 16        | 11452542        | <i>LOC388210</i>    | T/C        | C        | 6.23x10 <sup>-15</sup>       | (4)  | T        | 0.904 | 7.08x10 <sup>-01</sup>       |
| rs9302752        | 16        | 50719103        | <i>NOD2</i>         | A/G        | G        | 3.77x10 <sup>-40</sup>       | (9)  | C        | 1     | 9.83x10 <sup>-02</sup>       |
| rs16948876       | 16        | 50854418        | <i>CYLD</i>         | A/G        | A        | 1.64x10 <sup>-10</sup>       | (1)  | A        | 0.777 | 2.17x10 <sup>-01</sup>       |
| rs75680863       | 22        | 31007023        | <i>TCN2</i>         | T/A        | A        | 8.37x10 <sup>-21</sup>       | (8)  | T        | 0.804 | 2.54x10 <sup>-01</sup>       |

£ rs145562243 is not part of the 1000 Genomes project (Phase 1 and 3)

# imputed using the 1000 Genomes Phase 1 reference panel.

Bold typeface indicates SNPs replicated in the GWAS discovery sample

Table S4. SNPs in high linkage disequilibrium ( $r^2>0.8$ ) with rs3764147 in the 1000 Genomes KHV population

| SNP Id     | Position <sup>§</sup> | Alleles | MAF    | Distance | Dprime | R <sup>2</sup> | Correlated Alleles | RegulomeDB | Function | GWAS <i>P</i>          | GWAS Type | GWAS Information |
|------------|-----------------------|---------|--------|----------|--------|----------------|--------------------|------------|----------|------------------------|-----------|------------------|
| rs3764147  | chr13:44457925        | (A/G)   | 0.3586 | 0        | 1      | 1              | A=A,G=G            | 1f         | missense | 6.56x10 <sup>-05</sup> | genotyped | 1                |
| rs1932990  | chr13:44460242        | (C/T)   | 0.3586 | 2317     | 1      | 1              | A=C,G=T            | 6          | NA       | 6.56x10 <sup>-05</sup> | imputed   | 1                |
| rs9567307  | chr13:44471877        | (A/G)   | 0.3586 | 13952    | 1      | 1              | A=A,G=G            | 6          | NA       | 6.57x10 <sup>-05</sup> | imputed   | 0.999            |
| rs2121034  | chr13:44473866        | (G/T)   | 0.3586 | 15941    | 1      | 1              | A=G,G=T            | 7          | NA       | 6.59x10 <sup>-05</sup> | imputed   | 0.998            |
| rs2121033  | chr13:44475052        | (C/G)   | 0.3586 | 17127    | 0.978  | 0.9566         | A=C,G=G            | 6          | NA       | 0.000113101            | imputed   | 0.998            |
| rs1373904  | chr13:44475398        | (A/G)   | 0.3586 | 17473    | 0.978  | 0.9566         | A=A,G=G            | 5          | NA       | 0.000114411            | imputed   | 0.998            |
| rs7995004  | chr13:44478820        | (C/T)   | 0.3586 | 20895    | 0.978  | 0.9566         | A=C,G=T            | 7          | NA       | 0.000114902            | imputed   | 0.999            |
| rs9316058  | chr13:44485076        | (G/C)   | 0.3636 | 27151    | 0.9779 | 0.9355         | A=G,G=C            | 6          | NA       | 0.000137552            | imputed   | 0.983            |
| rs61960013 | chr13:44490181        | (C/G)   | 0.3687 | 32256    | 0.9777 | 0.915          | A=C,G=G            | 5          | NA       | 0.00240748             | imputed   | 0.961            |
| rs6561151  | chr13:44484706        | (G/A)   | 0.3586 | 26781    | 0.9561 | 0.9141         | A=G,G=A            | 5          | NA       | 0.00025133             | imputed   | 0.991            |

<sup>§</sup> positions are given according to the hg19 reference build

Table S5. Association statistics of genome-wide suggestive HLA SNPs in the discovery cohort and the replication cohort

| SNP         | Position <sup>s</sup> | m/M   | MAF   | info  | Discovery |      |                           |          | Replication |    |                           |                           |
|-------------|-----------------------|-------|-------|-------|-----------|------|---------------------------|----------|-------------|----|---------------------------|---------------------------|
|             |                       |       |       |       | RA        | nfam | <i>P</i>                  | MAF      | info        | RA | <i>P</i> <sup>##</sup>    | OR <sup>##</sup> [95% CI] |
| rs1265048   | 31081409              | C/T   | 0.462 | 1     | T         | 310  | 8.72049x10 <sup>-06</sup> | 0.468884 | 0.942       | T  | 1.58285x10 <sup>-06</sup> | 0.721 ]0 - 0.81]          |
| rs707913    | 31084787              | G/A   | 0.252 | 0.997 | A         | 298  | 3.11437x10 <sup>-06</sup> | 0.269246 | 0.985       | A  | 0.0162387                 | 0.851 ]0 - 0.96]          |
| rs1265045   | 31085340              | A/G   | 0.252 | 0.997 | G         | 299  | 3.17807x10 <sup>-06</sup> | 0.267198 | 0.979       | G  | 0.01828185                | 0.853 ]0 - 0.97]          |
| rs28383830  | 31088950              | TGG/T | 0.301 | 0.995 | T         | 331  | 3.80686x10 <sup>-06</sup> | 0.318851 | 0.967       | T  | 0.0194322                 | 0.86 ]0 - 0.97]           |
| rs3094208   | 31090672              | G/A   | 0.426 | 0.999 | A         | 320  | 1.07251x10 <sup>-06</sup> | 0.443509 | 0.997       | A  | 0.02495445                | 0.874 ]0 - 0.98]          |
| rs3130998   | 31090945              | T/C   | 0.431 | 0.999 | C         | 321  | 1.13543x10 <sup>-06</sup> | 0.447631 | 0.992       | C  | 0.02938365                | 0.878 ]0 - 0.98]          |
| rs3132542   | 31091163              | A/G   | 0.431 | 0.999 | G         | 318  | 1.14391x10 <sup>-06</sup> | 0.447556 | 0.993       | G  | 0.02978155                | 0.878 ]0 - 0.98]          |
| rs3095310   | 31091447              | T/C   | 0.431 | 0.999 | C         | 318  | 1.16338x10 <sup>-06</sup> | 0.44754  | 0.993       | C  | 0.03009215                | 0.879 ]0 - 0.98]          |
| rs3095309   | 31091475              | T/C   | 0.476 | 0.999 | T         | 324  | 8.16477x10 <sup>-09</sup> | 0.444361 | 0.977       | T  | 9.46x10 <sup>-05</sup>    | 1.297 [1.16 - Inf[        |
| rs3094206   | 31091642              | G/C   | 0.416 | 0.999 | C         | 324  | 2.11699x10 <sup>-06</sup> | 0.437176 | 0.993       | C  | 0.00424399                | 0.835 ]0 - 0.93]          |
| rs3094205   | 31091862              | G/A   | 0.395 | 1     | A         | 318  | 3.91571x10 <sup>-07</sup> | 0.415089 | 1           | A  | 0.0289926                 | 0.877 ]0 - 0.98]          |
| rs3094204   | 31091992              | A/G   | 0.391 | 1     | A         | 324  | 1.38138x10 <sup>-07</sup> | 0.376639 | 0.983       | A  | 0.000178394               | 1.29 [1.15 - Inf[         |
| rs3094199   | 31093326              | A/G   | 0.184 | 0.998 | A         | 221  | 5.19623x10 <sup>-07</sup> | 0.171306 | 0.998       | A  | 2.29996x10 <sup>-05</sup> | 1.475 [1.26 - Inf[        |
| rs3094197   | 31093485              | A/G   | 0.184 | 0.998 | A         | 221  | 5.252x10 <sup>-07</sup>   | 0.171714 | 1           | A  | 2.37825x10 <sup>-05</sup> | 1.473 [1.26 - Inf[        |
| rs3094196   | 31093947              | G/A   | 0.269 | 0.997 | A         | 305  | 4.94733x10 <sup>-08</sup> | 0.304487 | 0.974       | A  | 4.70x10 <sup>-04</sup>    | 0.789 ]0 - 0.89]          |
| rs3131005   | 31095864              | G/A   | 0.18  | 0.997 | G         | 221  | 1.39111x10 <sup>-06</sup> | 0.169985 | 0.994       | G  | 1.84629x10 <sup>-05</sup> | 1.481 [1.26 - Inf[        |
| rs2844634   | 31096184              | C/G   | 0.269 | 0.998 | G         | 307  | 1.73449x10 <sup>-08</sup> | 0.302326 | 1           | G  | 4.65x10 <sup>-04</sup>    | 0.793 ]0 - 0.89]          |
| rs2844633   | 31096189              | T/C   | 0.269 | 0.998 | C         | 307  | 1.73308x10 <sup>-08</sup> | 0.302055 | 1           | C  | 4.20x10 <sup>-04</sup>    | 0.791 ]0 - 0.89]          |
| rs10947140  | 31102143              | A/G   | 0.364 | 0.991 | G         | 337  | 7.46156x10 <sup>-06</sup> | 0.37956  | 0.938       | G  | 0.000196483               | 0.778 ]0 - 0.87]          |
| rs3132557   | 31106409              | G/A   | 0.384 | 0.989 | A         | 319  | 6.16345x10 <sup>-06</sup> | 0.377354 | 0.937       | A  | 0.000297875               | 0.784 ]0 - 0.88]          |
| rs114240643 | 31108628              | G/A   | 0.117 | 0.994 | G         | 147  | 9.02682x10 <sup>-06</sup> | 0.113536 | 0.972       | G  | 8.44205x10 <sup>-10</sup> | 2.042 [1.66 - Inf[        |
| rs1265082   | 31111606              | A/G   | 0.236 | 0.997 | G         | 274  | 7.19662x10 <sup>-07</sup> | 0.243239 | 0.96        | G  | 0.000474965               | 0.773 ]0 - 0.88]          |
| rs1265113   | 31117577              | G/C   | 0.237 | 0.998 | C         | 274  | 8.35912x10 <sup>-07</sup> | 0.24291  | 0.962       | C  | 0.000486452               | 0.773 ]0 - 0.88]          |
| rs1265110   | 31119422              | T/C   | 0.237 | 0.999 | C         | 274  | 9.12075x10 <sup>-07</sup> | 0.242722 | 0.963       | C  | 0.000494401               | 0.774 ]0 - 0.88]          |
| rs1265107   | 31121529              | T/G   | 0.237 | 0.999 | G         | 274  | 9.33801x10 <sup>-07</sup> | 0.242684 | 0.963       | G  | 0.000496658               | 0.774 ]0 - 0.88]          |

| SNP         | Position <sup>§</sup> | m/M     | MAF   | info  | Discovery |      |                           |          | Replication |      |                           |                           |
|-------------|-----------------------|---------|-------|-------|-----------|------|---------------------------|----------|-------------|------|---------------------------|---------------------------|
|             |                       |         |       |       | RA        | nfam | <i>P</i>                  | MAF      | info        | RA   | <i>P</i> <sup>**</sup>    | OR <sup>**</sup> [95% CI] |
| rs1265163   | 31134087              | G/C     | 0.237 | 0.998 | C         | 273  | 1.78593x10 <sup>-06</sup> | 0.242372 | 0.966       | C    | 0.00050538                | 0.774 ]0 - 0.88]          |
| rs3094194   | 31136240              | G/A     | 0.46  | 1     | G         | 314  | 1.42614x10 <sup>-08</sup> | 0.444076 | 0.989       | G    | 5.03x10 <sup>-06</sup>    | 1.359 [1.21 - Inf[        |
| rs9281239   | 31137715              | CCAGA/C | 0.275 | 0.997 | C         | 302  | 8.95487x10 <sup>-07</sup> | 0.279159 | 0.969       | C    | 0.00090405                | 0.793 ]0 - 0.9]           |
| rs1265160   | 31138371              | A/G     | 0.244 | 0.989 | G         | 328  | 1.94129x10 <sup>-06</sup> | 0.254178 | 0.951       | G    | 0.000305988               | 0.767 ]0 - 0.87]          |
| rs9461650   | 31143241              | A/G     | 0.298 | 1     | A         | 271  | 9.52788x10 <sup>-07</sup> | 0.28186  | 0.954       | A    | 3.60472x10 <sup>-07</sup> | 1.479 [1.3 - Inf[         |
| rs3734869   | 31143639              | A/G     | 0.134 | 1     | A         | 159  | 8.86805x10 <sup>-06</sup> | 0.136638 | 0.956       | A    | 7.63355x10 <sup>-09</sup> | 1.852 [1.54 - Inf[        |
| rs56178408  | 31150039              | T/C     | 0.121 | 0.999 | T         | 150  | 9.42962x10 <sup>-06</sup> | 0.123997 | 0.973       | T    | 4.71539x10 <sup>-10</sup> | 2.015 [1.66 - Inf[        |
| rs138693838 | 31150159              | CTG/C   | 0.134 | 0.999 | CTG       | 160  | 9.02978x10 <sup>-06</sup> | 0.136464 | 0.956       | CTG  | 7.26615x10 <sup>-09</sup> | 1.855 [1.54 - Inf[        |
| rs4713440   | 31150323              | A/C     | 0.121 | 0.999 | A         | 150  | 9.39967x10 <sup>-06</sup> | 0.12465  | 0.969       | A    | 4.67131x10 <sup>-10</sup> | 2.015 [1.66 - Inf[        |
| rs9468884   | 31151319              | C/T     | 0.121 | 0.999 | C         | 150  | 9.45919x10 <sup>-06</sup> | 0.124037 | 0.972       | C    | 4.68199x10 <sup>-10</sup> | 2.016 [1.66 - Inf[        |
| rs9468885   | 31151413              | C/A     | 0.134 | 0.999 | C         | 160  | 9.06342x10 <sup>-06</sup> | 0.136441 | 0.956       | C    | 7.15915x10 <sup>-09</sup> | 1.855 [1.54 - Inf[        |
| rs9468886   | 31151573              | A/G     | 0.121 | 0.999 | A         | 150  | 9.45767x10 <sup>-06</sup> | 0.124042 | 0.972       | A    | 4.75245x10 <sup>-10</sup> | 2.015 [1.65 - Inf[        |
| rs6913894   | 31151997              | A/G     | 0.121 | 0.999 | A         | 150  | 9.41752x10 <sup>-06</sup> | 0.122963 | 0.972       | A    | 9.85525x10 <sup>-10</sup> | 1.996 [1.64 - Inf[        |
| rs6913631   | 31152098              | C/A     | 0.121 | 0.999 | C         | 150  | 9.47041x10 <sup>-06</sup> | 0.124082 | 0.973       | C    | 4.76474x10 <sup>-10</sup> | 2.015 [1.65 - Inf[        |
| rs56332747  | 31152321              | A/G     | 0.121 | 0.999 | A         | 150  | 9.47286x10 <sup>-06</sup> | 0.124044 | 0.972       | A    | 4.75571x10 <sup>-10</sup> | 2.015 [1.65 - Inf[        |
| rs9501351   | 31153126              | T/C     | 0.121 | 0.999 | T         | 150  | 9.49217x10 <sup>-06</sup> | 0.124042 | 0.972       | T    | 4.75975x10 <sup>-10</sup> | 2.015 [1.65 - Inf[        |
| rs9501506   | 31153573              | C/T     | 0.121 | 0.999 | C         | 150  | 9.49869x10 <sup>-06</sup> | 0.124041 | 0.972       | C    | 4.76662x10 <sup>-10</sup> | 2.015 [1.65 - Inf[        |
| rs9501507   | 31153716              | C/T     | 0.121 | 0.999 | C         | 150  | 9.49891x10 <sup>-06</sup> | 0.124079 | 0.973       | C    | 4.7744x10 <sup>-10</sup>  | 2.015 [1.65 - Inf[        |
| rs115737821 | 31154138              | G/C     | 0.121 | 0.999 | G         | 150  | 9.5077x10 <sup>-06</sup>  | 0.123598 | 0.972       | G    | 7.067x10 <sup>-10</sup>   | 2.001 [1.64 - Inf[        |
| rs17191040  | 31154206              | G/T     | 0.121 | 0.999 | G         | 150  | 9.5077x10 <sup>-06</sup>  | 0.123598 | 0.972       | G    | 7.067x10 <sup>-10</sup>   | 2.001 [1.64 - Inf[        |
| rs17197402  | 31154384              | A/G     | 0.121 | 0.999 | A         | 150  | 9.51401x10 <sup>-06</sup> | 0.123598 | 0.972       | A    | 7.07455x10 <sup>-10</sup> | 2.001 [1.64 - Inf[        |
| rs199987285 | 31154473              | CTTG/C  | 0.121 | 0.999 | CTTG      | 150  | 9.51424x10 <sup>-06</sup> | 0.123598 | 0.972       | CTTG | 7.0731x10 <sup>-10</sup>  | 2.001 [1.64 - Inf[        |
| rs149432671 | 31156350              | C/A     | 0.121 | 0.999 | C         | 150  | 9.43943x10 <sup>-06</sup> | 0.122507 | 0.972       | C    | 1.46689x10 <sup>-09</sup> | 1.982 [1.63 - Inf[        |
| rs9500884   | 31165733              | T/C     | 0.12  | 0.998 | T         | 154  | 9.4223x10 <sup>-06</sup>  | 0.114105 | 0.977       | T    | 1.92309x10 <sup>-09</sup> | 2.005 [1.64 - Inf[        |
| rs9501079   | 31175097              | A/G     | 0.123 | 1     | A         | 154  | 8.68744x10 <sup>-06</sup> | 0.12375  | 0.984       | A    | 5.21245x10 <sup>-11</sup> | 2.093 [1.72 - Inf[        |
| rs9501082   | 31175251              | T/C     | 0.123 | 1     | T         | 154  | 8.68744x10 <sup>-06</sup> | 0.12375  | 0.984       | T    | 5.2169x10 <sup>-11</sup>  | 2.093 [1.72 - Inf[        |
| rs4516988   | 31176602              | G/A     | 0.123 | 0.999 | G         | 155  | 9.3182x10 <sup>-06</sup>  | 0.123715 | 0.984       | G    | 5.21045x10 <sup>-11</sup> | 2.093 [1.72 - Inf[        |
| rs9501513   | 31176678              | G/A     | 0.123 | 0.999 | G         | 154  | 9.48551x10 <sup>-06</sup> | 0.123717 | 0.984       | G    | 5.2056x10 <sup>-11</sup>  | 2.093 [1.72 - Inf[        |



| SNP         | Position <sup>s</sup> | m/M    | MAF   | info  | Discovery |      |                           | Replication |       |      |                           |                    |
|-------------|-----------------------|--------|-------|-------|-----------|------|---------------------------|-------------|-------|------|---------------------------|--------------------|
|             |                       |        |       |       | RA        | nfam | P                         | MAF         | info  | RA   | P**                       | OR** [95% CI]      |
| rs3130513   | 31178084              | G/C    | 0.364 | 0.998 | C         | 330  | 2.30119x10 <sup>-06</sup> | 0.385403    | 0.962 | C    | 0.072923                  | 0.901 ]0 - 1.01]   |
| rs145021772 | 31189460              | T/C    | 0.157 | 1     | T         | 189  | 8.92082x10 <sup>-06</sup> | 0.151984    | 0.992 | T    | 2.91541x10 <sup>-05</sup> | 1.493 [1.26 - Inf[ |
| rs201234764 | 31190027              | G/GC   | 0.157 | 1     | G         | 189  | 8.91635x10 <sup>-06</sup> | 0.151987    | 0.992 | G    | 2.92239x10 <sup>-05</sup> | 1.493 [1.26 - Inf[ |
| rs113565451 | 31190175              | T/C    | 0.157 | 1     | T         | 189  | 8.91635x10 <sup>-06</sup> | 0.151985    | 0.992 | T    | 2.92303x10 <sup>-05</sup> | 1.493 [1.26 - Inf[ |
| rs35391481  | 31190736              | A/C    | 0.157 | 1     | A         | 198  | 8.77935x10 <sup>-06</sup> | 0.152039    | 0.992 | A    | 2.94642x10 <sup>-05</sup> | 1.492 [1.26 - Inf[ |
| rs12662501  | 31190850              | T/C    | 0.157 | 1     | T         | 187  | 8.98763x10 <sup>-06</sup> | 0.151986    | 0.992 | T    | 2.92634x10 <sup>-05</sup> | 1.493 [1.26 - Inf[ |
| rs12662527  | 31190897              | A/G    | 0.157 | 1     | A         | 188  | 8.91189x10 <sup>-06</sup> | 0.15244     | 0.989 | A    | 3.10144x10 <sup>-05</sup> | 1.491 [1.26 - Inf[ |
| rs35891864  | 31191099              | A/G    | 0.157 | 1     | A         | 188  | 8.91189x10 <sup>-06</sup> | 0.151987    | 0.992 | A    | 2.93037x10 <sup>-05</sup> | 1.492 [1.26 - Inf[ |
| rs141822551 | 31191249              | A/AC   | 0.148 | 0.968 | A         | 201  | 3.75455x10 <sup>-06</sup> | 0.138323    | 0.972 | A    | 1.49189x10 <sup>-07</sup> | 1.725 [1.44 - Inf[ |
| rs139975409 | 31191259              | A/C    | 0.148 | 0.968 | A         | 201  | 3.75455x10 <sup>-06</sup> | 0.138323    | 0.972 | A    | 1.49227x10 <sup>-07</sup> | 1.725 [1.44 - Inf[ |
| rs113831989 | 31191294              | T/C    | 0.148 | 0.968 | T         | 201  | 3.75455x10 <sup>-06</sup> | 0.138323    | 0.972 | T    | 1.49234x10 <sup>-07</sup> | 1.725 [1.44 - Inf[ |
| rs112056872 | 31192675              | T/A    | 0.157 | 1     | T         | 206  | 8.9523x10 <sup>-06</sup>  | 0.152397    | 0.992 | T    | 3.01669x10 <sup>-05</sup> | 1.491 [1.26 - Inf[ |
| rs2394887   | 31194711              | T/G    | 0.157 | 1     | T         | 188  | 8.87668x10 <sup>-06</sup> | 0.15226     | 0.993 | T    | 2.9419x10 <sup>-05</sup>  | 1.492 [1.26 - Inf[ |
| rs112815193 | 31196390              | A/G    | 0.157 | 1     | A         | 189  | 8.80734x10 <sup>-06</sup> | 0.152571    | 0.993 | A    | 2.81927x10 <sup>-05</sup> | 1.493 [1.26 - Inf[ |
| rs56210254  | 31196640              | G/A    | 0.157 | 1     | G         | 188  | 8.86354x10 <sup>-06</sup> | 0.152454    | 0.994 | G    | 2.80283x10 <sup>-05</sup> | 1.493 [1.26 - Inf[ |
| rs12664433  | 31200672              | A/G    | 0.172 | 0.996 | A         | 205  | 9.68689x10 <sup>-07</sup> | 0.164657    | 0.994 | A    | 1.61681x10 <sup>-06</sup> | 1.568 [1.33 - Inf[ |
| rs112758902 | 31201534              | T/C    | 0.17  | 1     | T         | 198  | 8.82611x10 <sup>-07</sup> | 0.164638    | 0.995 | T    | 1.62742x10 <sup>-06</sup> | 1.567 [1.33 - Inf[ |
| rs55783607  | 31202764              | C/T    | 0.17  | 1     | C         | 198  | 8.80925x10 <sup>-07</sup> | 0.164638    | 0.995 | C    | 1.65595x10 <sup>-06</sup> | 1.567 [1.33 - Inf[ |
| rs72863879  | 31203352              | A/G    | 0.17  | 1     | A         | 198  | 8.80204x10 <sup>-07</sup> | 0.164644    | 0.995 | A    | 1.6662x10 <sup>-06</sup>  | 1.567 [1.33 - Inf[ |
| rs113288104 | 31204402              | T/G    | 0.17  | 1     | T         | 198  | 8.78767x10 <sup>-07</sup> | 0.164652    | 0.995 | T    | 1.68731x10 <sup>-06</sup> | 1.566 [1.33 - Inf[ |
| rs377461698 | 31205030              | C/A    | 0.17  | 1     | C         | 198  | 8.7781x10 <sup>-07</sup>  | 0.164658    | 0.995 | C    | 1.70092x10 <sup>-06</sup> | 1.566 [1.33 - Inf[ |
| rs371249684 | 31205031              | C/A    | 0.17  | 1     | C         | 198  | 8.7781x10 <sup>-07</sup>  | 0.164658    | 0.995 | C    | 1.70092x10 <sup>-06</sup> | 1.566 [1.33 - Inf[ |
| rs3869118   | 31206136              | C/G    | 0.17  | 1     | C         | 198  | 8.76142x10 <sup>-07</sup> | 0.164671    | 0.995 | C    | 1.73001x10 <sup>-06</sup> | 1.565 [1.33 - Inf[ |
| rs113390008 | 31207351              | A/G    | 0.17  | 1     | A         | 197  | 8.79774x10 <sup>-07</sup> | 0.164792    | 0.995 | A    | 1.70099x10 <sup>-06</sup> | 1.566 [1.33 - Inf[ |
| rs111411820 | 31207589              | A/C    | 0.171 | 1     | A         | 196  | 1.10717x10 <sup>-06</sup> | 0.166734    | 0.995 | A    | 4.47998x10 <sup>-06</sup> | 1.531 [1.3 - Inf[  |
| rs12665166  | 31208242              | T/C    | 0.171 | 1     | T         | 196  | 1.10717x10 <sup>-06</sup> | 0.166777    | 0.995 | T    | 4.56799x10 <sup>-06</sup> | 1.53 [1.3 - Inf[   |
| rs35593555  | 31208289              | C/CATG | 0.351 | 1     | CATG      | 308  | 1.13294x10 <sup>-06</sup> | 0.376349    | 0.994 | CATG | 0.04523695                | 0.888 ]0 - 1]      |
| rs3095250   | 31208340              | T/C    | 0.394 | 1     | C         | 314  | 7.17926x10 <sup>-08</sup> | 0.412424    | 0.991 | C    | 3.13x10 <sup>-02</sup>    | 0.879 ]0 - 0.99]   |

| SNP         | Position <sup>§</sup> | m/M | Discovery |       |    |      | Replication               |          |       |    |                           |                    |
|-------------|-----------------------|-----|-----------|-------|----|------|---------------------------|----------|-------|----|---------------------------|--------------------|
|             |                       |     | MAF       | info  | RA | nfam | P                         | MAF      | info  | RA | P**                       | OR** [95% CI]      |
| rs3130534   | 31209045              | A/G | 0.351     | 1     | G  | 308  | 1.13294x10 <sup>-06</sup> | 0.376372 | 0.994 | G  | 0.04525615                | 0.888 ]0 - 1]      |
| rs112030670 | 31209380              | A/G | 0.169     | 1     | A  | 197  | 8.92517x10 <sup>-07</sup> | 0.164788 | 0.996 | A  | 1.76596x10 <sup>-06</sup> | 1.564 [1.33 - Inf[ |
| rs114475699 | 31211201              | C/T | 0.169     | 1     | C  | 197  | 8.99479x10 <sup>-07</sup> | 0.164842 | 0.996 | C  | 1.71991x10 <sup>-06</sup> | 1.565 [1.33 - Inf[ |
| rs4332019   | 31213413              | G/T | 0.171     | 1     | G  | 199  | 1.10093x10 <sup>-06</sup> | 0.166998 | 0.995 | G  | 4.6198x10 <sup>-06</sup>  | 1.529 [1.3 - Inf[  |
| rs2394897   | 31213502              | A/G | 0.171     | 1     | A  | 197  | 1.10776x10 <sup>-06</sup> | 0.166952 | 0.996 | A  | 4.58201x10 <sup>-06</sup> | 1.53 [1.3 - Inf[   |
| rs2394898   | 31213583              | C/T | 0.377     | 0.911 | T  | 395  | 1.84941x10 <sup>-06</sup> | 0.377365 | 0.924 | T  | 0.00396969                | 0.829 ]0 - 0.93]   |
| rs79997604  | 31213587              | T/C | 0.377     | 0.911 | C  | 395  | 1.85077x10 <sup>-06</sup> | 0.377365 | 0.924 | C  | 0.00396964                | 0.829 ]0 - 0.93]   |
| rs3899471   | 31215037              | C/T | 0.171     | 1     | C  | 198  | 1.10836x10 <sup>-06</sup> | 0.166989 | 0.996 | C  | 4.59355x10 <sup>-06</sup> | 1.529 [1.3 - Inf[  |
| rs12662550  | 31215732              | G/A | 0.171     | 1     | G  | 198  | 1.10866x10 <sup>-06</sup> | 0.167012 | 0.996 | G  | 4.59927x10 <sup>-06</sup> | 1.529 [1.3 - Inf[  |
| rs12665531  | 31215916              | A/G | 0.171     | 0.999 | A  | 201  | 1.00621x10 <sup>-06</sup> | 0.167492 | 0.994 | A  | 3.7092x10 <sup>-06</sup>  | 1.536 [1.31 - Inf[ |
| rs2394904   | 31216105              | A/G | 0.171     | 1     | A  | 198  | 1.10866x10 <sup>-06</sup> | 0.167025 | 0.996 | A  | 4.6026x10 <sup>-06</sup>  | 1.529 [1.3 - Inf[  |
| rs2394907   | 31217943              | T/C | 0.348     | 1     | C  | 309  | 8.43286x10 <sup>-07</sup> | 0.370554 | 0.997 | C  | 0.0370317                 | 0.882 ]0 - 0.99]   |
| rs55651925  | 31218131              | C/G | 0.169     | 0.999 | C  | 199  | 9.16257x10 <sup>-07</sup> | 0.164949 | 0.996 | C  | 1.63857x10 <sup>-06</sup> | 1.566 [1.33 - Inf[ |
| rs4084262   | 31218889              | T/C | 0.169     | 0.999 | T  | 205  | 9.23004x10 <sup>-07</sup> | 0.165075 | 0.996 | T  | 1.62957x10 <sup>-06</sup> | 1.566 [1.33 - Inf[ |
| rs3130434   | 31219803              | C/G | 0.379     | 0.982 | G  | 332  | 1.70931x10 <sup>-07</sup> | 0.382905 | 0.995 | G  | 0.0326289                 | 0.882 ]0 - 0.99]   |
| rs3130435   | 31219805              | A/G | 0.373     | 0.981 | G  | 334  | 1.12853x10 <sup>-07</sup> | 0.382028 | 0.996 | G  | 0.0250199                 | 0.875 ]0 - 0.98]   |
| rs3130540   | 31219862              | C/T | 0.373     | 0.982 | T  | 333  | 1.14159x10 <sup>-07</sup> | 0.382299 | 0.997 | T  | 0.0246597                 | 0.875 ]0 - 0.98]   |
| rs9264179   | 31219869              | C/T | 0.379     | 0.982 | T  | 332  | 1.69298x10 <sup>-07</sup> | 0.383698 | 0.996 | T  | 0.0275646                 | 0.878 ]0 - 0.98]   |
| rs9264180   | 31219902              | A/C | 0.377     | 0.981 | C  | 335  | 1.67864x10 <sup>-07</sup> | 0.3894   | 1     | C  | 0.0303032                 | 0.881 ]0 - 0.98]   |
| rs9264181   | 31219922              | T/C | 0.311     | 0.977 | C  | 334  | 6.92365x10 <sup>-06</sup> | 0.317469 | 1     | C  | 0.01907375                | 0.866 ]0 - 0.97]   |
| rs9264183   | 31219934              | G/A | 0.311     | 0.977 | A  | 334  | 6.92657x10 <sup>-06</sup> | 0.317469 | 1     | A  | 0.01907375                | 0.866 ]0 - 0.97]   |
| rs56375204  | 31219935              | C/G | 0.175     | 0.984 | C  | 232  | 1.94489x10 <sup>-06</sup> | 0.171714 | 1     | C  | 9.0263x10 <sup>-06</sup>  | 1.485 [1.27 - Inf[ |
| rs55685143  | 31219936              | T/G | 0.175     | 0.984 | T  | 232  | 1.94489x10 <sup>-06</sup> | 0.171444 | 1     | T  | 1.00655x10 <sup>-05</sup> | 1.483 [1.27 - Inf[ |
| rs9264184   | 31219945              | A/G | 0.311     | 0.977 | G  | 334  | 6.92495x10 <sup>-06</sup> | 0.317469 | 1     | G  | 0.01907375                | 0.866 ]0 - 0.97]   |
| rs55839536  | 31219958              | A/G | 0.173     | 0.984 | A  | 232  | 1.62703x10 <sup>-06</sup> | 0.169551 | 1     | A  | 3.35542x10 <sup>-06</sup> | 1.519 [1.3 - Inf[  |
| rs9264186   | 31220017              | A/G | 0.374     | 0.982 | G  | 337  | 1.18063x10 <sup>-07</sup> | 0.38314  | 0.998 | G  | 0.0250835                 | 0.876 ]0 - 0.98]   |
| rs9264187   | 31220027              | C/T | 0.379     | 0.982 | T  | 335  | 1.77849x10 <sup>-07</sup> | 0.384213 | 0.997 | T  | 0.0307139                 | 0.881 ]0 - 0.98]   |
| rs9264188   | 31220109              | T/C | 0.373     | 0.981 | C  | 335  | 1.14434x10 <sup>-07</sup> | 0.382047 | 0.997 | C  | 0.0236131                 | 0.874 ]0 - 0.98]   |

| SNP         | Position <sup>\$</sup> | m/M    | MAF   | info  | Discovery |      |                           |          |       | Replication |                           |                    |
|-------------|------------------------|--------|-------|-------|-----------|------|---------------------------|----------|-------|-------------|---------------------------|--------------------|
|             |                        |        |       |       | RA        | nfam | <i>P</i>                  | MAF      | info  | RA          | <i>P</i> **               | OR** [95% CI]      |
| rs3095257   | 31220318               | T/G    | 0.375 | 0.981 | G         | 354  | 1.04746x10 <sup>-07</sup> | 0.384173 | 0.997 | G           | 0.0168978                 | 0.866 ]0 - 0.97]   |
| rs2394945   | 31220971               | G/C    | 0.353 | 0.984 | G         | 327  | 4.19088x10 <sup>-08</sup> | 0.348447 | 0.971 | G           | 9.20x10 <sup>-07</sup>    | 1.416 [1.25 - Inf[ |
| rs2524084   | 31241639               | G/A    | 0.369 | 0.999 | A         | 317  | 3.32959x10 <sup>-06</sup> | 0.385343 | 1     | A           | 0.00050099                | 0.795 ]0 - 0.89]   |
| rs12662096  | 31242445               | C/T    | 0.131 | 0.998 | C         | 166  | 3.52123x10 <sup>-06</sup> | 0.125198 | 0.998 | C           | 8.505x10 <sup>-11</sup>   | 2.058 [1.69 - Inf[ |
| rs2524075   | 31243859               | T/C    | 0.194 | 0.999 | C         | 239  | 9.63573x10 <sup>-06</sup> | 0.208626 | 0.994 | C           | 0.0054809                 | 0.808 ]0 - 0.93]   |
| rs9468913   | 31244332               | T/C    | 0.132 | 1     | T         | 165  | 3.6746x10 <sup>-06</sup>  | 0.125633 | 0.999 | T           | 3.0757x10 <sup>-11</sup>  | 2.095 [1.72 - Inf[ |
| rs72855954  | 31246969               | G/A    | 0.159 | 0.996 | G         | 200  | 6.16496x10 <sup>-06</sup> | 0.153597 | 1     | G           | 1.10058x10 <sup>-06</sup> | 1.608 [1.36 - Inf[ |
| rs2853946   | 31247203               | T/A    | 0.33  | 0.998 | T         | 305  | 1.10848x10 <sup>-07</sup> | 0.321525 | 1     | T           | 5.0475x10 <sup>-06</sup>  | 1.392 [1.23 - Inf[ |
| rs28457789  | 31247801               | G/T    | 0.132 | 0.999 | G         | 165  | 3.76142x10 <sup>-06</sup> | 0.125461 | 0.998 | G           | 2.38057x10 <sup>-11</sup> | 2.106 [1.73 - Inf[ |
| rs28709322  | 31247804               | A/G    | 0.132 | 0.999 | A         | 165  | 3.76227x10 <sup>-06</sup> | 0.125459 | 0.998 | A           | 2.3711x10 <sup>-11</sup>  | 2.107 [1.73 - Inf[ |
| rs17192281  | 31248075               | A/G    | 0.133 | 0.998 | A         | 167  | 4.26831x10 <sup>-06</sup> | 0.128141 | 0.994 | A           | 4.16853x10 <sup>-10</sup> | 1.983 [1.64 - Inf[ |
| rs17192288  | 31248091               | A/G    | 0.131 | 0.999 | A         | 166  | 3.79097x10 <sup>-06</sup> | 0.125431 | 0.998 | A           | 2.31154x10 <sup>-11</sup> | 2.108 [1.73 - Inf[ |
| rs17192295  | 31248114               | T/C    | 0.131 | 0.999 | T         | 166  | 3.79358x10 <sup>-06</sup> | 0.125429 | 0.998 | T           | 2.30558x10 <sup>-11</sup> | 2.108 [1.73 - Inf[ |
| rs17192302  | 31248256               | T/C    | 0.131 | 0.999 | T         | 166  | 3.80848x10 <sup>-06</sup> | 0.125413 | 0.998 | T           | 2.27169x10 <sup>-11</sup> | 2.109 [1.73 - Inf[ |
| rs17192323  | 31248324               | T/C    | 0.131 | 0.999 | T         | 166  | 3.81642x10 <sup>-06</sup> | 0.125405 | 0.998 | T           | 2.25474x10 <sup>-11</sup> | 2.109 [1.73 - Inf[ |
| rs17198664  | 31248382               | T/C    | 0.133 | 0.998 | T         | 167  | 4.33799x10 <sup>-06</sup> | 0.12811  | 0.994 | T           | 4.00321x10 <sup>-10</sup> | 1.985 [1.64 - Inf[ |
| rs2844606   | 31248432               | A/G    | 0.472 | 0.996 | G         | 339  | 6.73388x10 <sup>-06</sup> | 0.485447 | 0.994 | G           | 0.000870425               | 0.806 ]0 - 0.9]    |
| rs2844605   | 31248591               | A/C    | 0.473 | 0.996 | C         | 339  | 6.76544x10 <sup>-06</sup> | 0.485469 | 0.994 | C           | 0.000863865               | 0.805 ]0 - 0.9]    |
| rs17198706  | 31248693               | G/C    | 0.131 | 0.999 | G         | 166  | 3.86318x10 <sup>-06</sup> | 0.125358 | 0.998 | G           | 2.15749x10 <sup>-11</sup> | 2.111 [1.74 - Inf[ |
| rs58114162  | 31248825               | T/C    | 0.131 | 0.999 | T         | 166  | 3.88432x10 <sup>-06</sup> | 0.125337 | 0.998 | T           | 2.11841x10 <sup>-11</sup> | 2.112 [1.74 - Inf[ |
| rs73728770  | 31248887               | C/G    | 0.131 | 0.999 | C         | 166  | 3.89267x10 <sup>-06</sup> | 0.125328 | 0.998 | C           | 2.1005x10 <sup>-11</sup>  | 2.112 [1.74 - Inf[ |
| rs189616187 | 31248995               | T/C    | 0.131 | 0.999 | T         | 166  | 3.91138x10 <sup>-06</sup> | 0.125309 | 0.998 | T           | 2.06818x10 <sup>-11</sup> | 2.113 [1.74 - Inf[ |
| rs2253489   | 31249195               | G/C    | 0.131 | 0.999 | G         | 166  | 3.94824x10 <sup>-06</sup> | 0.125276 | 0.998 | G           | 2.00547x10 <sup>-11</sup> | 2.114 [1.74 - Inf[ |
| rs73392854  | 31249326               | G/A    | 0.131 | 0.999 | G         | 167  | 3.95785x10 <sup>-06</sup> | 0.125982 | 0.996 | G           | 1.45965x10 <sup>-11</sup> | 2.126 [1.75 - Inf[ |
| rs141206831 | 31249358               | A/AAAG | 0.131 | 0.997 | A         | 169  | 4.35254x10 <sup>-06</sup> | 0.125577 | 0.995 | A           | 1.64104x10 <sup>-11</sup> | 2.123 [1.75 - Inf[ |
| rs28383843  | 31249893               | GT/G   | 0.133 | 0.999 | GT        | 168  | 3.73449x10 <sup>-06</sup> | 0.127243 | 0.996 | GT          | 1.48942x10 <sup>-11</sup> | 2.118 [1.74 - Inf[ |
| rs114612857 | 31250876               | G/C    | 0.134 | 0.999 | G         | 169  | 3.74927x10 <sup>-06</sup> | 0.129976 | 0.999 | G           | 5.6673x10 <sup>-11</sup>  | 2.046 [1.69 - Inf[ |
| rs6921855   | 31251312               | C/T    | 0.164 | 0.935 | T         | 293  | 1.12988x10 <sup>-06</sup> | 0.180483 | 0.888 | T           | 0.000234215               | 0.723 ]0 - 0.84]   |

| SNP         | Position <sup>s</sup> | m/M  | MAF   | info  | Discovery |      |                           |          | Replication |    |                           |                    |
|-------------|-----------------------|------|-------|-------|-----------|------|---------------------------|----------|-------------|----|---------------------------|--------------------|
|             |                       |      |       |       | RA        | nfam | P                         | MAF      | info        | RA | P**                       | OR** [95% CI]      |
| rs2524058   | 31251569              | A/G  | 0.488 | 0.998 | G         | 339  | 1.77248x10 <sup>-06</sup> | 0.492191 | 0.99        | G  | 0.000635135               | 0.801 ]0 - 0.9]    |
| rs6899660   | 31251643              | G/A  | 0.187 | 1     | A         | 229  | 1.59688x10 <sup>-06</sup> | 0.202864 | 0.986       | A  | 0.000893955               | 0.769 ]0 - 0.88]   |
| rs2524057   | 31251895              | G/A  | 0.304 | 1     | G         | 281  | 4.0282x10 <sup>-07</sup>  | 0.296222 | 0.998       | G  | 1.7932x10 <sup>-08</sup>  | 1.53 [1.34 - Inf[  |
| rs115182712 | 31251954              | G/A  | 0.133 | 0.999 | G         | 169  | 3.77605x10 <sup>-06</sup> | 0.129955 | 0.999       | G  | 5.58695x10 <sup>-11</sup> | 2.047 [1.69 - Inf[ |
| rs114020623 | 31251962              | T/C  | 0.133 | 0.999 | T         | 169  | 3.77605x10 <sup>-06</sup> | 0.129955 | 0.999       | T  | 5.58695x10 <sup>-11</sup> | 2.047 [1.69 - Inf[ |
| rs115699806 | 31252031              | G/A  | 0.133 | 0.999 | G         | 169  | 3.77713x10 <sup>-06</sup> | 0.12966  | 0.996       | G  | 5.43885x10 <sup>-11</sup> | 2.051 [1.69 - Inf[ |
| rs115931507 | 31252406              | C/T  | 0.133 | 0.999 | C         | 169  | 3.78687x10 <sup>-06</sup> | 0.129945 | 0.999       | C  | 5.54655x10 <sup>-11</sup> | 2.047 [1.69 - Inf[ |
| rs116281893 | 31252527              | C/T  | 0.133 | 0.999 | C         | 169  | 3.79012x10 <sup>-06</sup> | 0.129942 | 0.999       | C  | 5.5382x10 <sup>-11</sup>  | 2.047 [1.69 - Inf[ |
| rs9348860   | 31252667              | C/T  | 0.187 | 1     | T         | 229  | 1.58306x10 <sup>-06</sup> | 0.203671 | 0.984       | T  | 0.00105205                | 0.772 ]0 - 0.89]   |
| rs9348861   | 31252722              | G/A  | 0.187 | 1     | A         | 229  | 1.58214x10 <sup>-06</sup> | 0.202924 | 0.986       | A  | 0.000880905               | 0.769 ]0 - 0.88]   |
| rs9348862   | 31252747              | C/T  | 0.187 | 1     | T         | 229  | 1.58182x10 <sup>-06</sup> | 0.202925 | 0.986       | T  | 0.00088099                | 0.769 ]0 - 0.88]   |
| rs9368670   | 31252882              | T/C  | 0.187 | 1     | C         | 229  | 1.58182x10 <sup>-06</sup> | 0.202934 | 0.986       | C  | 0.0008783                 | 0.769 ]0 - 0.88]   |
| rs116350468 | 31252951              | T/G  | 0.133 | 0.999 | T         | 169  | 3.80534x10 <sup>-06</sup> | 0.12993  | 0.999       | T  | 5.5031x10 <sup>-11</sup>  | 2.048 [1.69 - Inf[ |
| rs115727572 | 31253034              | G/T  | 0.133 | 0.999 | G         | 169  | 3.80865x10 <sup>-06</sup> | 0.129926 | 0.999       | G  | 5.48845x10 <sup>-11</sup> | 2.048 [1.69 - Inf[ |
| rs114206206 | 31253468              | T/G  | 0.133 | 0.999 | T         | 169  | 3.82846x10 <sup>-06</sup> | 0.12991  | 0.999       | T  | 5.43405x10 <sup>-11</sup> | 2.048 [1.69 - Inf[ |
| rs114798972 | 31253514              | T/C  | 0.133 | 0.999 | T         | 169  | 3.83177x10 <sup>-06</sup> | 0.129909 | 0.999       | T  | 5.42715x10 <sup>-11</sup> | 2.048 [1.69 - Inf[ |
| rs73728779  | 31253605              | C/T  | 0.136 | 0.995 | C         | 192  | 7.24496x10 <sup>-06</sup> | 0.133893 | 0.984       | C  | 5.7844x10 <sup>-10</sup>  | 1.95 [1.62 - Inf[  |
| rs73728781  | 31253619              | T/C  | 0.136 | 0.994 | T         | 187  | 5.19599x10 <sup>-06</sup> | 0.134276 | 0.984       | T  | 1.2662x10 <sup>-09</sup>  | 1.917 [1.59 - Inf[ |
| rs59217589  | 31254280              | A/T  | 0.133 | 1     | A         | 169  | 3.85852x10 <sup>-06</sup> | 0.129886 | 0.999       | A  | 5.35205x10 <sup>-11</sup> | 2.049 [1.69 - Inf[ |
| rs58410461  | 31254299              | C/A  | 0.133 | 1     | C         | 169  | 3.86191x10 <sup>-06</sup> | 0.129885 | 0.999       | C  | 5.34815x10 <sup>-11</sup> | 2.049 [1.69 - Inf[ |
| rs58022700  | 31254334              | T/C  | 0.133 | 1     | T         | 169  | 3.86303x10 <sup>-06</sup> | 0.129884 | 0.999       | T  | 5.3448x10 <sup>-11</sup>  | 2.049 [1.69 - Inf[ |
| rs373238011 | 31254364              | C/CT | 0.304 | 1     | C         | 281  | 4.08278x10 <sup>-07</sup> | 0.296201 | 0.999       | C  | 1.71315x10 <sup>-08</sup> | 1.53 [1.34 - Inf[  |
| rs58860177  | 31254485              | C/T  | 0.133 | 1     | C         | 169  | 3.8664x10 <sup>-06</sup>  | 0.12988  | 0.999       | C  | 5.33195x10 <sup>-11</sup> | 2.049 [1.69 - Inf[ |
| rs56328367  | 31254594              | C/T  | 0.133 | 1     | C         | 169  | 3.87203x10 <sup>-06</sup> | 0.129877 | 0.999       | C  | 5.32345x10 <sup>-11</sup> | 2.049 [1.69 - Inf[ |
| rs9380236   | 31254664              | G/A  | 0.187 | 1     | A         | 229  | 1.58182x10 <sup>-06</sup> | 0.20308  | 0.987       | A  | 0.00084798                | 0.768 ]0 - 0.88]   |
| rs55822325  | 31254691              | G/A  | 0.133 | 1     | G         | 169  | 3.87316x10 <sup>-06</sup> | 0.129874 | 0.999       | G  | 5.3097x10 <sup>-11</sup>  | 2.049 [1.69 - Inf[ |
| rs9368671   | 31254704              | T/C  | 0.187 | 1     | C         | 229  | 1.58182x10 <sup>-06</sup> | 0.203085 | 0.987       | C  | 0.00084659                | 0.768 ]0 - 0.88]   |
| rs369387030 | 31254836              | T/TC | 0.187 | 1     | TC        | 229  | 1.58182x10 <sup>-06</sup> | 0.203094 | 0.987       | TC | 0.000845165               | 0.768 ]0 - 0.88]   |

| SNP         | Position <sup>\$</sup> | m/M       | MAF   | info  | Discovery |      |                           |          | Replication |         |                           |                           |
|-------------|------------------------|-----------|-------|-------|-----------|------|---------------------------|----------|-------------|---------|---------------------------|---------------------------|
|             |                        |           |       |       | RA        | nfam | <i>P</i>                  | MAF      | info        | RA      | <i>P</i> <sup>**</sup>    | OR <sup>**</sup> [95% CI] |
| rs201734761 | 31254964               | G/GAAA    | 0.135 | 0.999 | G         | 170  | 4.80941x10 <sup>-06</sup> | 0.132857 | 0.993       | G       | 6.5957x10 <sup>-10</sup>  | 1.943 [1.61 - Inf[        |
| rs199720990 | 31254972               | C/A       | 0.133 | 1     | C         | 169  | 3.88336x10 <sup>-06</sup> | 0.129867 | 0.999       | C       | 5.284x10 <sup>-11</sup>   | 2.049 [1.69 - Inf[        |
| rs72861464  | 31255063               | G/A       | 0.187 | 1     | A         | 229  | 1.58182x10 <sup>-06</sup> | 0.203109 | 0.987       | A       | 0.000841955               | 0.768 ]0 - 0.88]          |
| rs57599285  | 31255183               | T/C       | 0.133 | 1     | T         | 169  | 3.89018x10 <sup>-06</sup> | 0.129862 | 0.999       | T       | 5.2683x10 <sup>-11</sup>  | 2.049 [1.69 - Inf[        |
| rs16899147  | 31255201               | G/A       | 0.187 | 1     | A         | 229  | 1.58182x10 <sup>-06</sup> | 0.20312  | 0.987       | A       | 0.000839995               | 0.768 ]0 - 0.88]          |
| rs57742463  | 31255210               | A/C       | 0.133 | 1     | A         | 169  | 3.89245x10 <sup>-06</sup> | 0.129861 | 0.999       | A       | 5.26505x10 <sup>-11</sup> | 2.049 [1.69 - Inf[        |
| rs72861465  | 31255344               | A/G       | 0.187 | 1     | G         | 229  | 1.58182x10 <sup>-06</sup> | 0.203129 | 0.987       | G       | 0.000837985               | 0.768 ]0 - 0.88]          |
| rs114598080 | 31255442               | A/G       | 0.133 | 1     | A         | 169  | 3.9016x10 <sup>-06</sup>  | 0.13007  | 1           | A       | 4.39264x10 <sup>-11</sup> | 2.055 [1.7 - Inf[         |
| rs55825863  | 31255465               | A/C       | 0.133 | 1     | A         | 169  | 3.9016x10 <sup>-06</sup>  | 0.130064 | 1           | A       | 4.41027x10 <sup>-11</sup> | 2.055 [1.7 - Inf[         |
| rs56184612  | 31255523               | G/A       | 0.133 | 1     | G         | 169  | 3.90389x10 <sup>-06</sup> | 0.130064 | 1           | G       | 4.41026x10 <sup>-11</sup> | 2.055 [1.7 - Inf[         |
| rs56016471  | 31255555               | C/A       | 0.133 | 1     | C         | 169  | 3.90504x10 <sup>-06</sup> | 0.130064 | 1           | C       | 4.41026x10 <sup>-11</sup> | 2.055 [1.7 - Inf[         |
| rs55918251  | 31255811               | G/A       | 0.133 | 1     | G         | 169  | 3.91308x10 <sup>-06</sup> | 0.130065 | 1           | G       | 4.40947x10 <sup>-11</sup> | 2.055 [1.7 - Inf[         |
| rs2524049   | 31255953               | G/C       | 0.304 | 1     | G         | 281  | 4.11721x10 <sup>-07</sup> | 0.296192 | 1           | G       | 1.68619x10 <sup>-08</sup> | 1.53 [1.35 - Inf[         |
| rs17198727  | 31256013               | T/C       | 0.187 | 1     | C         | 229  | 1.58182x10 <sup>-06</sup> | 0.203174 | 0.987       | C       | 0.00082846                | 0.768 ]0 - 0.88]          |
| rs17192393  | 31256065               | G/C       | 0.133 | 1     | G         | 169  | 3.92231x10 <sup>-06</sup> | 0.130064 | 1           | G       | 4.41029x10 <sup>-11</sup> | 2.055 [1.7 - Inf[         |
| rs9366776   | 31256630               | A/G       | 0.187 | 1     | G         | 229  | 1.58182x10 <sup>-06</sup> | 0.203217 | 0.987       | G       | 0.00081942                | 0.768 ]0 - 0.88]          |
| rs17192421  | 31256693               | C/T       | 0.133 | 1     | C         | 168  | 3.94602x10 <sup>-06</sup> | 0.130065 | 1           | C       | 4.40948x10 <sup>-11</sup> | 2.055 [1.7 - Inf[         |
| rs17198776  | 31256732               | T/C       | 0.133 | 1     | T         | 167  | 3.94836x10 <sup>-06</sup> | 0.130065 | 1           | T       | 4.40948x10 <sup>-11</sup> | 2.055 [1.7 - Inf[         |
| rs17198783  | 31256746               | C/T       | 0.133 | 1     | C         | 167  | 3.94836x10 <sup>-06</sup> | 0.130113 | 0.999       | C       | 4.19371x10 <sup>-11</sup> | 2.057 [1.7 - Inf[         |
| rs2524044   | 31256753               | G/T       | 0.304 | 1     | G         | 280  | 4.17908x10 <sup>-07</sup> | 0.296217 | 0.999       | G       | 1.68302x10 <sup>-08</sup> | 1.53 [1.35 - Inf[         |
| rs10947169  | 31256916               | C/T       | 0.187 | 1     | T         | 229  | 1.58182x10 <sup>-06</sup> | 0.203238 | 0.987       | T       | 0.0008152                 | 0.768 ]0 - 0.88]          |
| rs114015300 | 31256965               | A/C       | 0.133 | 1     | A         | 167  | 3.95081x10 <sup>-06</sup> | 0.130065 | 1           | A       | 4.40947x10 <sup>-11</sup> | 2.055 [1.7 - Inf[         |
| rs115007911 | 31256982               | A/C       | 0.133 | 1     | A         | 167  | 3.95163x10 <sup>-06</sup> | 0.130065 | 1           | A       | 4.40947x10 <sup>-11</sup> | 2.055 [1.7 - Inf[         |
| rs146303266 | 31257093               | GTGTCTC/G | 0.133 | 1     | GTGTCTC   | 167  | 3.95492x10 <sup>-06</sup> | 0.130065 | 1           | GTGTCTC | 4.40947x10 <sup>-11</sup> | 2.055 [1.7 - Inf[         |
| rs115226524 | 31257120               | C/T       | 0.133 | 1     | C         | 167  | 3.95656x10 <sup>-06</sup> | 0.130065 | 1           | C       | 4.40866x10 <sup>-11</sup> | 2.055 [1.7 - Inf[         |
| rs2524042   | 31257160               | G/C       | 0.304 | 1     | G         | 280  | 4.14596x10 <sup>-07</sup> | 0.296216 | 0.999       | G       | 1.67362x10 <sup>-08</sup> | 1.531 [1.35 - Inf[        |
| rs115482903 | 31257198               | A/G       | 0.133 | 1     | A         | 167  | 3.96233x10 <sup>-06</sup> | 0.130065 | 1           | A       | 4.40866x10 <sup>-11</sup> | 2.055 [1.7 - Inf[         |
| rs116736925 | 31257229               | A/G       | 0.133 | 1     | A         | 167  | 3.96399x10 <sup>-06</sup> | 0.130065 | 1           | A       | 4.40866x10 <sup>-11</sup> | 2.055 [1.7 - Inf[         |

| SNP         | Position <sup>§</sup> | m/M     | MAF   | info  | Discovery |      |                           | Replication |       |    |                           |                    |
|-------------|-----------------------|---------|-------|-------|-----------|------|---------------------------|-------------|-------|----|---------------------------|--------------------|
|             |                       |         |       |       | RA        | nfam | <i>P</i>                  | MAF         | info  | RA | <i>P</i> **               | OR** [95% CI]      |
| rs115504545 | 31257251              | G/A     | 0.133 | 1     | G         | 167  | 3.96564x10 <sup>-06</sup> | 0.130065    | 1     | G  | 4.40785x10 <sup>-11</sup> | 2.055 [1.7 - Inf[  |
| rs116337797 | 31257422              | A/G     | 0.133 | 1     | A         | 167  | 3.97645x10 <sup>-06</sup> | 0.130065    | 1     | A  | 4.40705x10 <sup>-11</sup> | 2.055 [1.7 - Inf[  |
| rs115651636 | 31257533              | C/T     | 0.133 | 1     | C         | 167  | 3.98147x10 <sup>-06</sup> | 0.130065    | 1     | C  | 4.40703x10 <sup>-11</sup> | 2.055 [1.7 - Inf[  |
| rs114110521 | 31257617              | A/G     | 0.133 | 1     | A         | 167  | 3.98398x10 <sup>-06</sup> | 0.130065    | 1     | A  | 4.40703x10 <sup>-11</sup> | 2.055 [1.7 - Inf[  |
| rs115545796 | 31258036              | C/A     | 0.133 | 1     | C         | 167  | 3.98987x10 <sup>-06</sup> | 0.130065    | 1     | C  | 4.40705x10 <sup>-11</sup> | 2.055 [1.7 - Inf[  |
| rs182445956 | 31258046              | C/T     | 0.133 | 1     | C         | 167  | 3.98987x10 <sup>-06</sup> | 0.130065    | 1     | C  | 4.40705x10 <sup>-11</sup> | 2.055 [1.7 - Inf[  |
| rs2524039   | 31258226              | G/A     | 0.304 | 1     | G         | 280  | 4.17399x10 <sup>-07</sup> | 0.296253    | 0.999 | G  | 1.6586x10 <sup>-08</sup>  | 1.531 [1.35 - Inf[ |
| rs114093160 | 31258371              | A/G     | 0.133 | 1     | A         | 170  | 4.00562x10 <sup>-06</sup> | 0.130079    | 1     | A  | 4.37174x10 <sup>-11</sup> | 2.055 [1.7 - Inf[  |
| rs367893790 | 31258626              | C/CATAT | 0.133 | 1     | C         | 167  | 3.99833x10 <sup>-06</sup> | 0.130066    | 1     | C  | 4.40624x10 <sup>-11</sup> | 2.055 [1.7 - Inf[  |
| rs2256583   | 31258846              | C/T     | 0.304 | 1     | C         | 280  | 4.18126x10 <sup>-07</sup> | 0.296261    | 0.999 | C  | 1.65498x10 <sup>-08</sup> | 1.531 [1.35 - Inf[ |
| rs3873377   | 31258868              | C/T     | 0.187 | 1     | T         | 229  | 1.58182x10 <sup>-06</sup> | 0.203506    | 0.988 | T  | 0.0007632                 | 0.767 ]0 - 0.88]   |
| rs78950083  | 31258986              | C/T     | 0.133 | 1     | C         | 167  | 4.00087x10 <sup>-06</sup> | 0.130066    | 1     | C  | 4.40624x10 <sup>-11</sup> | 2.055 [1.7 - Inf[  |
| rs16899170  | 31259017              | C/T     | 0.133 | 1     | C         | 167  | 4.00087x10 <sup>-06</sup> | 0.130066    | 1     | C  | 4.40624x10 <sup>-11</sup> | 2.055 [1.7 - Inf[  |
| rs4307215   | 31259188              | GTT/G   | 0.371 | 0.982 | G         | 367  | 6.25105x10 <sup>-07</sup> | 0.393949    | 0.948 | G  | 0.0329502                 | 0.877 ]0 - 0.99]   |
| rs35667233  | 31259269              | C/T     | 0.133 | 1     | C         | 167  | 4.00087x10 <sup>-06</sup> | 0.130066    | 1     | C  | 4.40544x10 <sup>-11</sup> | 2.055 [1.7 - Inf[  |
| rs34115632  | 31259298              | G/A     | 0.133 | 1     | G         | 167  | 4.00087x10 <sup>-06</sup> | 0.130066    | 1     | G  | 4.40544x10 <sup>-11</sup> | 2.055 [1.7 - Inf[  |
| rs36087596  | 31259299              | C/CT    | 0.133 | 1     | C         | 167  | 4.00087x10 <sup>-06</sup> | 0.130066    | 1     | C  | 4.40544x10 <sup>-11</sup> | 2.055 [1.7 - Inf[  |
| rs35401506  | 31259332              | C/T     | 0.133 | 1     | C         | 167  | 4.00087x10 <sup>-06</sup> | 0.130066    | 1     | C  | 4.40544x10 <sup>-11</sup> | 2.055 [1.7 - Inf[  |
| rs36060788  | 31259338              | G/A     | 0.133 | 1     | G         | 167  | 4.00087x10 <sup>-06</sup> | 0.130066    | 1     | G  | 4.40544x10 <sup>-11</sup> | 2.055 [1.7 - Inf[  |
| rs35870025  | 31259435              | T/C     | 0.133 | 1     | T         | 167  | 4.00087x10 <sup>-06</sup> | 0.130066    | 1     | T  | 4.40544x10 <sup>-11</sup> | 2.055 [1.7 - Inf[  |
| rs34743644  | 31259443              | T/C     | 0.133 | 1     | T         | 167  | 4.00087x10 <sup>-06</sup> | 0.130066    | 1     | T  | 4.40544x10 <sup>-11</sup> | 2.055 [1.7 - Inf[  |
| rs116506525 | 31259458              | C/T     | 0.133 | 1     | C         | 167  | 4.00087x10 <sup>-06</sup> | 0.130066    | 1     | C  | 4.40544x10 <sup>-11</sup> | 2.055 [1.7 - Inf[  |
| rs116030808 | 31259495              | G/A     | 0.133 | 1     | G         | 167  | 4.00087x10 <sup>-06</sup> | 0.130066    | 1     | G  | 4.40544x10 <sup>-11</sup> | 2.055 [1.7 - Inf[  |
| rs115175858 | 31259543              | C/T     | 0.133 | 1     | C         | 167  | 4.00087x10 <sup>-06</sup> | 0.130066    | 1     | C  | 4.40544x10 <sup>-11</sup> | 2.055 [1.7 - Inf[  |
| rs147841590 | 31259588              | G/GA    | 0.133 | 1     | G         | 167  | 4.00087x10 <sup>-06</sup> | 0.130076    | 1     | G  | 4.40336x10 <sup>-11</sup> | 2.055 [1.7 - Inf[  |
| rs114454776 | 31259605              | A/G     | 0.133 | 1     | A         | 167  | 4.00087x10 <sup>-06</sup> | 0.130076    | 1     | A  | 4.40336x10 <sup>-11</sup> | 2.055 [1.7 - Inf[  |
| rs115106318 | 31259704              | G/A     | 0.133 | 1     | G         | 167  | 4.00087x10 <sup>-06</sup> | 0.130066    | 1     | G  | 4.40544x10 <sup>-11</sup> | 2.055 [1.7 - Inf[  |
| rs34332804  | 31259729              | C/G     | 0.133 | 1     | C         | 167  | 4.00087x10 <sup>-06</sup> | 0.130066    | 1     | C  | 4.40544x10 <sup>-11</sup> | 2.055 [1.7 - Inf[  |

| SNP         | Position <sup>\$</sup> | m/M  | Discovery |       |    |      | Replication               |          |       |    |                           |                   |
|-------------|------------------------|------|-----------|-------|----|------|---------------------------|----------|-------|----|---------------------------|-------------------|
|             |                        |      | MAF       | info  | RA | nfam | <i>P</i>                  | MAF      | info  | RA | <i>P</i> **               | OR** [95% CI]     |
| rs34254374  | 31259834               | G/T  | 0.133     | 1     | G  | 167  | 4.00087x10 <sup>-06</sup> | 0.130066 | 1     | G  | 4.40544x10 <sup>-11</sup> | 2.055 [1.7 - Inf[ |
| rs35206735  | 31259837               | A/G  | 0.133     | 1     | A  | 167  | 4.00087x10 <sup>-06</sup> | 0.130066 | 1     | A  | 4.40544x10 <sup>-11</sup> | 2.055 [1.7 - Inf[ |
| rs114500903 | 31259869               | C/T  | 0.133     | 1     | C  | 167  | 4.00087x10 <sup>-06</sup> | 0.130066 | 1     | C  | 4.40544x10 <sup>-11</sup> | 2.055 [1.7 - Inf[ |
| rs116452682 | 31259870               | A/G  | 0.133     | 1     | A  | 167  | 4.00087x10 <sup>-06</sup> | 0.130066 | 1     | A  | 4.40544x10 <sup>-11</sup> | 2.055 [1.7 - Inf[ |
| rs6916525   | 31259902               | G/A  | 0.187     | 1     | A  | 229  | 1.58182x10 <sup>-06</sup> | 0.203556 | 0.989 | A  | 0.00075227                | 0.766 ]0 - 0.88]  |
| rs6939681   | 31259952               | G/T  | 0.187     | 1     | T  | 229  | 1.58182x10 <sup>-06</sup> | 0.203582 | 0.988 | T  | 0.00074003                | 0.766 ]0 - 0.88]  |
| rs34925694  | 31259955               | G/A  | 0.133     | 1     | G  | 167  | 4.00087x10 <sup>-06</sup> | 0.130066 | 1     | G  | 4.40544x10 <sup>-11</sup> | 2.055 [1.7 - Inf[ |
| rs34505728  | 31260004               | A/C  | 0.133     | 1     | A  | 167  | 4.00087x10 <sup>-06</sup> | 0.130066 | 1     | A  | 4.40542x10 <sup>-11</sup> | 2.055 [1.7 - Inf[ |
| rs35298376  | 31260040               | G/T  | 0.133     | 1     | G  | 167  | 4.00087x10 <sup>-06</sup> | 0.130066 | 1     | G  | 4.40463x10 <sup>-11</sup> | 2.055 [1.7 - Inf[ |
| rs35389342  | 31260049               | C/T  | 0.133     | 1     | C  | 167  | 4.00087x10 <sup>-06</sup> | 0.130066 | 1     | C  | 4.40463x10 <sup>-11</sup> | 2.055 [1.7 - Inf[ |
| rs35235581  | 31260105               | A/G  | 0.133     | 1     | A  | 167  | 4.00087x10 <sup>-06</sup> | 0.130066 | 1     | A  | 4.40463x10 <sup>-11</sup> | 2.055 [1.7 - Inf[ |
| rs35626283  | 31260168               | CT/C | 0.133     | 1     | CT | 167  | 4.00087x10 <sup>-06</sup> | 0.130066 | 1     | CT | 4.40463x10 <sup>-11</sup> | 2.055 [1.7 - Inf[ |
| rs114392121 | 31260185               | C/T  | 0.133     | 1     | C  | 167  | 4.00087x10 <sup>-06</sup> | 0.130066 | 1     | C  | 4.40463x10 <sup>-11</sup> | 2.055 [1.7 - Inf[ |
| rs115042633 | 31260201               | A/T  | 0.133     | 1     | A  | 167  | 4.00087x10 <sup>-06</sup> | 0.130066 | 1     | A  | 4.40463x10 <sup>-11</sup> | 2.055 [1.7 - Inf[ |
| rs9357122   | 31260345               | C/T  | 0.187     | 1     | T  | 229  | 1.58182x10 <sup>-06</sup> | 0.20359  | 0.989 | T  | 0.000745405               | 0.766 ]0 - 0.88]  |
| rs117127791 | 31260398               | G/A  | 0.133     | 1     | G  | 167  | 4.00087x10 <sup>-06</sup> | 0.130066 | 1     | G  | 4.40463x10 <sup>-11</sup> | 2.055 [1.7 - Inf[ |
| rs114601215 | 31260462               | G/C  | 0.133     | 1     | G  | 167  | 4.00002x10 <sup>-06</sup> | 0.130066 | 1     | G  | 4.40463x10 <sup>-11</sup> | 2.055 [1.7 - Inf[ |
| rs9394051   | 31260569               | C/G  | 0.187     | 1     | G  | 231  | 1.54218x10 <sup>-06</sup> | 0.203612 | 0.989 | G  | 0.000741785               | 0.766 ]0 - 0.88]  |
| rs114489270 | 31260583               | C/T  | 0.133     | 1     | C  | 167  | 4.00002x10 <sup>-06</sup> | 0.130066 | 1     | C  | 4.40462x10 <sup>-11</sup> | 2.055 [1.7 - Inf[ |
| rs116548532 | 31260594               | G/T  | 0.133     | 1     | G  | 167  | 4.00002x10 <sup>-06</sup> | 0.130066 | 1     | G  | 4.40462x10 <sup>-11</sup> | 2.055 [1.7 - Inf[ |
| rs116537416 | 31260633               | C/T  | 0.133     | 1     | C  | 167  | 4.00002x10 <sup>-06</sup> | 0.130067 | 1     | C  | 4.40383x10 <sup>-11</sup> | 2.055 [1.7 - Inf[ |
| rs9394052   | 31260708               | T/C  | 0.187     | 1     | C  | 231  | 1.51956x10 <sup>-06</sup> | 0.203627 | 0.989 | C  | 0.000739345               | 0.766 ]0 - 0.88]  |
| rs55993314  | 31261056               | T/C  | 0.133     | 1     | T  | 167  | 3.99833x10 <sup>-06</sup> | 0.130067 | 1     | T  | 4.40382x10 <sup>-11</sup> | 2.055 [1.7 - Inf[ |
| rs16899178  | 31261137               | T/C  | 0.133     | 1     | T  | 167  | 3.99833x10 <sup>-06</sup> | 0.130078 | 1     | T  | 4.37508x10 <sup>-11</sup> | 2.055 [1.7 - Inf[ |
| rs56409019  | 31261358               | G/C  | 0.133     | 1     | G  | 167  | 3.99833x10 <sup>-06</sup> | 0.130067 | 1     | G  | 4.40383x10 <sup>-11</sup> | 2.055 [1.7 - Inf[ |
| rs55793836  | 31261393               | T/C  | 0.133     | 1     | T  | 167  | 3.99833x10 <sup>-06</sup> | 0.130067 | 1     | T  | 4.40383x10 <sup>-11</sup> | 2.055 [1.7 - Inf[ |
| rs9295969   | 31261470               | A/G  | 0.188     | 0.928 | G  | 418  | 1.46444x10 <sup>-06</sup> | 0.203731 | 0.99  | G  | 0.000719405               | 0.766 ]0 - 0.88]  |
| rs34504767  | 31261492               | T/C  | 0.133     | 1     | T  | 167  | 3.99833x10 <sup>-06</sup> | 0.130084 | 1     | T  | 4.32812x10 <sup>-11</sup> | 2.055 [1.7 - Inf[ |

| SNP         | Position <sup>§</sup> | m/M | Discovery |       |    |      | Replication               |          |       |    |                           |                    |
|-------------|-----------------------|-----|-----------|-------|----|------|---------------------------|----------|-------|----|---------------------------|--------------------|
|             |                       |     | MAF       | info  | RA | nfam | P                         | MAF      | info  | RA | P**                       | OR** [95% CI]      |
| rs115748458 | 31261570              | G/T | 0.133     | 1     | G  | 167  | 3.99833x10 <sup>-06</sup> | 0.130084 | 1     | G  | 4.32812x10 <sup>-11</sup> | 2.055 [1.7 - Inf[  |
| rs116134275 | 31261571              | C/T | 0.133     | 1     | C  | 167  | 3.99833x10 <sup>-06</sup> | 0.130084 | 1     | C  | 4.32812x10 <sup>-11</sup> | 2.055 [1.7 - Inf[  |
| rs35742578  | 31261645              | A/G | 0.133     | 1     | A  | 167  | 3.99833x10 <sup>-06</sup> | 0.130084 | 1     | A  | 4.32812x10 <sup>-11</sup> | 2.055 [1.7 - Inf[  |
| rs35196124  | 31261777              | T/A | 0.133     | 1     | T  | 167  | 3.99833x10 <sup>-06</sup> | 0.130084 | 1     | T  | 4.32733x10 <sup>-11</sup> | 2.055 [1.7 - Inf[  |
| rs35933419  | 31261781              | G/A | 0.133     | 1     | G  | 167  | 3.99833x10 <sup>-06</sup> | 0.130084 | 1     | G  | 4.32733x10 <sup>-11</sup> | 2.055 [1.7 - Inf[  |
| rs114265643 | 31261851              | T/C | 0.133     | 1     | T  | 167  | 3.99833x10 <sup>-06</sup> | 0.130084 | 1     | T  | 4.32733x10 <sup>-11</sup> | 2.055 [1.7 - Inf[  |
| rs187999352 | 31261887              | T/A | 0.133     | 1     | T  | 167  | 3.99833x10 <sup>-06</sup> | 0.130084 | 1     | T  | 4.32733x10 <sup>-11</sup> | 2.055 [1.7 - Inf[  |
| rs192233466 | 31261888              | A/T | 0.133     | 1     | A  | 167  | 3.99833x10 <sup>-06</sup> | 0.130084 | 1     | A  | 4.32733x10 <sup>-11</sup> | 2.055 [1.7 - Inf[  |
| rs2524152   | 31261929              | T/C | 0.303     | 0.993 | T  | 301  | 3.73601x10 <sup>-07</sup> | 0.296316 | 0.999 | T  | 1.60616x10 <sup>-08</sup> | 1.531 [1.35 - Inf[ |
| rs35611056  | 31261956              | G/A | 0.133     | 1     | G  | 167  | 3.99833x10 <sup>-06</sup> | 0.130052 | 0.999 | G  | 4.28072x10 <sup>-11</sup> | 2.056 [1.7 - Inf[  |
| rs34187356  | 31261983              | C/T | 0.133     | 1     | C  | 167  | 3.99833x10 <sup>-06</sup> | 0.130052 | 0.999 | C  | 4.28072x10 <sup>-11</sup> | 2.056 [1.7 - Inf[  |
| rs56042166  | 31262024              | G/A | 0.133     | 1     | G  | 167  | 3.99833x10 <sup>-06</sup> | 0.130052 | 0.999 | G  | 4.28072x10 <sup>-11</sup> | 2.056 [1.7 - Inf[  |
| rs2524150   | 31262650              | A/T | 0.301     | 0.988 | A  | 306  | 3.7192x10 <sup>-07</sup>  | 0.296332 | 0.999 | A  | 1.60888x10 <sup>-08</sup> | 1.531 [1.35 - Inf[ |
| rs2524149   | 31262651              | T/C | 0.301     | 0.988 | T  | 306  | 3.72358x10 <sup>-07</sup> | 0.296332 | 0.999 | T  | 1.60888x10 <sup>-08</sup> | 1.531 [1.35 - Inf[ |
| rs189869162 | 31262677              | C/T | 0.133     | 1     | C  | 167  | 3.99833x10 <sup>-06</sup> | 0.130068 | 1     | C  | 4.39983x10 <sup>-11</sup> | 2.055 [1.7 - Inf[  |
| rs115667045 | 31262717              | A/T | 0.133     | 1     | A  | 167  | 3.99833x10 <sup>-06</sup> | 0.130068 | 1     | A  | 4.39982x10 <sup>-11</sup> | 2.055 [1.7 - Inf[  |
| rs114899495 | 31262761              | T/C | 0.133     | 1     | T  | 167  | 3.99833x10 <sup>-06</sup> | 0.130068 | 1     | T  | 4.39982x10 <sup>-11</sup> | 2.055 [1.7 - Inf[  |
| rs116654277 | 31262769              | T/C | 0.133     | 1     | T  | 167  | 3.99833x10 <sup>-06</sup> | 0.130068 | 1     | T  | 4.39982x10 <sup>-11</sup> | 2.055 [1.7 - Inf[  |
| rs2524147   | 31262781              | A/G | 0.3       | 0.987 | A  | 306  | 3.71854x10 <sup>-07</sup> | 0.29637  | 0.999 | A  | 1.61089x10 <sup>-08</sup> | 1.531 [1.35 - Inf[ |
| rs2524146   | 31262783              | C/T | 0.3       | 0.987 | C  | 307  | 3.7245x10 <sup>-07</sup>  | 0.29637  | 0.999 | C  | 1.61089x10 <sup>-08</sup> | 1.531 [1.35 - Inf[ |
| rs116405890 | 31262870              | T/C | 0.133     | 1     | T  | 167  | 3.99833x10 <sup>-06</sup> | 0.130068 | 1     | T  | 4.39982x10 <sup>-11</sup> | 2.055 [1.7 - Inf[  |
| rs115219503 | 31262959              | C/T | 0.133     | 1     | C  | 167  | 3.99833x10 <sup>-06</sup> | 0.130085 | 1     | C  | 4.38813x10 <sup>-11</sup> | 2.055 [1.7 - Inf[  |
| rs115973915 | 31263349              | A/C | 0.133     | 1     | A  | 167  | 4.00378x10 <sup>-06</sup> | 0.130068 | 1     | A  | 4.39821x10 <sup>-11</sup> | 2.055 [1.7 - Inf[  |
| rs114016160 | 31263410              | A/G | 0.133     | 1     | A  | 167  | 4.00463x10 <sup>-06</sup> | 0.130069 | 1     | A  | 4.39742x10 <sup>-11</sup> | 2.055 [1.7 - Inf[  |
| rs115101855 | 31263482              | T/A | 0.133     | 1     | T  | 167  | 4.00447x10 <sup>-06</sup> | 0.130069 | 1     | T  | 4.39742x10 <sup>-11</sup> | 2.055 [1.7 - Inf[  |
| rs114601085 | 31263548              | T/C | 0.133     | 1     | T  | 167  | 4.00583x10 <sup>-06</sup> | 0.130069 | 1     | T  | 4.39742x10 <sup>-11</sup> | 2.055 [1.7 - Inf[  |
| rs114294380 | 31263601              | G/T | 0.133     | 1     | G  | 167  | 4.00702x10 <sup>-06</sup> | 0.130069 | 1     | G  | 4.39742x10 <sup>-11</sup> | 2.055 [1.7 - Inf[  |
| rs200307568 | 31263721              | T/G | 0.133     | 1     | T  | 167  | 4.0079x10 <sup>-06</sup>  | 0.130069 | 1     | T  | 4.39743x10 <sup>-11</sup> | 2.055 [1.7 - Inf[  |



| SNP         | Position <sup>s</sup> | m/M     | Discovery |       |       |      | Replication               |          |       |       |                           |                    |
|-------------|-----------------------|---------|-----------|-------|-------|------|---------------------------|----------|-------|-------|---------------------------|--------------------|
|             |                       |         | MAF       | info  | RA    | nfam | P                         | MAF      | info  | RA    | P**                       | OR** [95% CI]      |
| rs114583506 | 31263801              | T/G     | 0.133     | 1     | T     | 167  | 4.00927x10 <sup>-06</sup> | 0.130069 | 1     | T     | 4.39742x10 <sup>-11</sup> | 2.055 [1.7 - Inf[  |
| rs116165038 | 31263852              | C/G     | 0.136     | 0.99  | C     | 181  | 6.72289x10 <sup>-06</sup> | 0.130097 | 1     | C     | 4.39803x10 <sup>-11</sup> | 2.055 [1.7 - Inf[  |
| rs115865502 | 31264178              | T/C     | 0.133     | 1     | T     | 167  | 4.01408x10 <sup>-06</sup> | 0.130069 | 1     | T     | 4.39582x10 <sup>-11</sup> | 2.055 [1.7 - Inf[  |
| rs115228090 | 31264284              | T/C     | 0.132     | 0.996 | T     | 170  | 3.89798x10 <sup>-06</sup> | 0.127262 | 0.982 | T     | 5.62565x10 <sup>-11</sup> | 2.073 [1.71 - Inf[ |
| rs115805679 | 31264288              | C/T     | 0.132     | 0.996 | C     | 170  | 3.89999x10 <sup>-06</sup> | 0.127214 | 0.982 | C     | 5.4538x10 <sup>-11</sup>  | 2.075 [1.71 - Inf[ |
| rs115494471 | 31264408              | T/C     | 0.133     | 1     | T     | 167  | 4.01494x10 <sup>-06</sup> | 0.130069 | 1     | T     | 4.39583x10 <sup>-11</sup> | 2.055 [1.7 - Inf[  |
| rs114973736 | 31264497              | C/T     | 0.133     | 1     | C     | 167  | 4.01494x10 <sup>-06</sup> | 0.130069 | 1     | C     | 4.39583x10 <sup>-11</sup> | 2.055 [1.7 - Inf[  |
| rs115964138 | 31264512              | A/G     | 0.133     | 1     | A     | 167  | 4.01494x10 <sup>-06</sup> | 0.130069 | 1     | A     | 4.39583x10 <sup>-11</sup> | 2.055 [1.7 - Inf[  |
| rs116334679 | 31264517              | C/T     | 0.133     | 1     | C     | 167  | 4.01494x10 <sup>-06</sup> | 0.130069 | 1     | C     | 4.39583x10 <sup>-11</sup> | 2.055 [1.7 - Inf[  |
| rs115700453 | 31264577              | C/T     | 0.133     | 1     | C     | 167  | 4.01494x10 <sup>-06</sup> | 0.130069 | 1     | C     | 4.39582x10 <sup>-11</sup> | 2.055 [1.7 - Inf[  |
| rs200436274 | 31264580              | T/TC    | 0.133     | 1     | T     | 167  | 4.01494x10 <sup>-06</sup> | 0.130069 | 1     | T     | 4.39503x10 <sup>-11</sup> | 2.055 [1.7 - Inf[  |
| rs574228159 | 31264583              | T/G     | 0.133     | 1     | T     | 167  | 4.01494x10 <sup>-06</sup> | 0.130069 | 1     | T     | 4.39503x10 <sup>-11</sup> | 2.055 [1.7 - Inf[  |
| rs9366777   | 31264715              | T/A     | 0.188     | 1     | A     | 229  | 2.65474x10 <sup>-06</sup> | 0.205846 | 0.988 | T     | 0.5                       | ns                 |
| rs114770325 | 31264845              | C/T     | 0.133     | 1     | C     | 167  | 4.01371x10 <sup>-06</sup> | 0.13007  | 1     | C     | 4.39264x10 <sup>-11</sup> | 2.055 [1.7 - Inf[  |
| rs114904826 | 31264960              | C/T     | 0.133     | 1     | C     | 167  | 4.01097x10 <sup>-06</sup> | 0.13007  | 1     | C     | 4.39264x10 <sup>-11</sup> | 2.055 [1.7 - Inf[  |
| rs115753074 | 31265168              | A/G     | 0.133     | 1     | A     | 167  | 4.00754x10 <sup>-06</sup> | 0.13007  | 1     | A     | 4.39324x10 <sup>-11</sup> | 2.055 [1.7 - Inf[  |
| rs115975714 | 31265242              | G/T     | 0.133     | 1     | G     | 167  | 4.00617x10 <sup>-06</sup> | 0.130071 | 1     | G     | 4.38807x10 <sup>-11</sup> | 2.055 [1.7 - Inf[  |
| rs17198811  | 31265634              | T/C     | 0.133     | 1     | T     | 167  | 4.00275x10 <sup>-06</sup> | 0.130072 | 1     | T     | 4.38595x10 <sup>-11</sup> | 2.055 [1.7 - Inf[  |
| rs17198818  | 31265695              | A/G     | 0.133     | 1     | A     | 167  | 4.00139x10 <sup>-06</sup> | 0.130073 | 1     | A     | 4.38258x10 <sup>-11</sup> | 2.055 [1.7 - Inf[  |
| rs3828860   | 31265736              | T/C     | 0.133     | 1     | T     | 167  | 4.00139x10 <sup>-06</sup> | 0.130073 | 1     | T     | 4.3826x10 <sup>-11</sup>  | 2.055 [1.7 - Inf[  |
| rs17192470  | 31265743              | T/C     | 0.133     | 1     | T     | 167  | 4.00275x10 <sup>-06</sup> | 0.130072 | 1     | T     | 4.38339x10 <sup>-11</sup> | 2.055 [1.7 - Inf[  |
| rs17192491  | 31265788              | G/C     | 0.133     | 1     | G     | 167  | 4.00002x10 <sup>-06</sup> | 0.130073 | 1     | G     | 4.37889x10 <sup>-11</sup> | 2.055 [1.7 - Inf[  |
| rs17198839  | 31265807              | C/A     | 0.133     | 1     | C     | 167  | 4.00002x10 <sup>-06</sup> | 0.130073 | 1     | C     | 4.37889x10 <sup>-11</sup> | 2.055 [1.7 - Inf[  |
| rs9348864   | 31265855              | C/T     | 0.17      | 0.998 | T     | 269  | 3.00517x10 <sup>-06</sup> | 0.190582 | 0.996 | T     | 0.001920905               | 0.78 ]0 - 0.9]     |
| rs17198860  | 31265875              | A/G     | 0.133     | 1     | A     | 167  | 4.00002x10 <sup>-06</sup> | 0.130074 | 1     | A     | 4.37294x10 <sup>-11</sup> | 2.055 [1.7 - Inf[  |
| rs148136265 | 31265884              | A/ACAAT | 0.17      | 0.999 | ACAAT | 261  | 3.00195x10 <sup>-06</sup> | 0.190855 | 0.996 | ACAAT | 0.00164068                | 0.776 ]0 - 0.89]   |
| rs17192498  | 31265887              | G/A     | 0.138     | 0.983 | G     | 254  | 6.55644x10 <sup>-06</sup> | 0.138722 | 0.948 | G     | 1.37604x10 <sup>-10</sup> | 2.01 [1.66 - Inf[  |
| rs17192505  | 31265910              | G/T     | 0.133     | 1     | G     | 167  | 4.00172x10 <sup>-06</sup> | 0.130091 | 1     | G     | 4.31903x10 <sup>-11</sup> | 2.055 [1.7 - Inf[  |

| SNP         | Position <sup>§</sup> | m/M  | MAF   | info  | Discovery |      |                           | Replication |       |    |                           |                    |
|-------------|-----------------------|------|-------|-------|-----------|------|---------------------------|-------------|-------|----|---------------------------|--------------------|
|             |                       |      |       |       | RA        | nfam | <i>P</i>                  | MAF         | info  | RA | <i>P</i> **               | OR** [95% CI]      |
| rs17192512  | 31265914              | G/A  | 0.133 | 1     | G         | 167  | 4.00002x10 <sup>-06</sup> | 0.130074    | 1     | G  | 4.37245x10 <sup>-11</sup> | 2.055 [1.7 - Inf[  |
| rs17192533  | 31266085              | G/C  | 0.135 | 1     | G         | 166  | 5.13922x10 <sup>-06</sup> | 0.132485    | 0.994 | G  | 2.87749x10 <sup>-10</sup> | 1.976 [1.64 - Inf[ |
| rs17198909  | 31266189              | T/A  | 0.133 | 0.997 | T         | 166  | 5.45889x10 <sup>-06</sup> | 0.129273    | 0.995 | T  | 5.70035x10 <sup>-11</sup> | 2.053 [1.69 - Inf[ |
| rs138758697 | 31266310              | A/AG | 0.133 | 1     | A         | 167  | 4.00002x10 <sup>-06</sup> | 0.130074    | 1     | A  | 4.37559x10 <sup>-11</sup> | 2.055 [1.7 - Inf[  |
| rs16899203  | 31266335              | C/T  | 0.133 | 1     | C         | 167  | 4.00002x10 <sup>-06</sup> | 0.130073    | 1     | C  | 4.37718x10 <sup>-11</sup> | 2.055 [1.7 - Inf[  |
| rs139795635 | 31266411              | TA/T | 0.133 | 1     | TA        | 167  | 4.00002x10 <sup>-06</sup> | 0.130074    | 1     | TA | 4.37304x10 <sup>-11</sup> | 2.055 [1.7 - Inf[  |
| rs115491491 | 31266465              | G/A  | 0.133 | 1     | G         | 167  | 4.00002x10 <sup>-06</sup> | 0.130074    | 1     | G  | 4.37064x10 <sup>-11</sup> | 2.055 [1.7 - Inf[  |
| rs116364562 | 31266479              | C/G  | 0.133 | 1     | C         | 167  | 4.00002x10 <sup>-06</sup> | 0.130074    | 1     | C  | 4.37064x10 <sup>-11</sup> | 2.055 [1.7 - Inf[  |
| rs201641102 | 31267776              | G/A  | 0.133 | 1     | G         | 167  | 3.99833x10 <sup>-06</sup> | 0.13008     | 0.999 | G  | 4.33859x10 <sup>-11</sup> | 2.055 [1.7 - Inf[  |
| rs116647350 | 31268833              | A/G  | 0.133 | 1     | A         | 167  | 3.99833x10 <sup>-06</sup> | 0.130079    | 0.999 | A  | 4.33426x10 <sup>-11</sup> | 2.055 [1.7 - Inf[  |
| rs12663075  | 31269256              | A/C  | 0.133 | 1     | A         | 167  | 3.99833x10 <sup>-06</sup> | 0.130082    | 0.999 | A  | 4.33811x10 <sup>-11</sup> | 2.055 [1.7 - Inf[  |
| rs56138398  | 31269299              | C/G  | 0.133 | 1     | C         | 167  | 3.99833x10 <sup>-06</sup> | 0.130081    | 0.999 | C  | 4.32352x10 <sup>-11</sup> | 2.056 [1.7 - Inf[  |
| rs3915970   | 31269460              | C/T  | 0.135 | 1     | C         | 166  | 5.15058x10 <sup>-06</sup> | 0.132603    | 0.993 | C  | 2.82343x10 <sup>-10</sup> | 1.977 [1.64 - Inf[ |
| rs2854007   | 31313586              | G/A  | 0.134 | 1     | G         | 167  | 8.10524x10 <sup>-06</sup> | 0.134388    | 0.989 | G  | 2.24385x10 <sup>-10</sup> | 1.962 [1.63 - Inf[ |
| rs2854006   | 31313591              | A/G  | 0.134 | 1     | A         | 167  | 8.10524x10 <sup>-06</sup> | 0.134387    | 0.989 | A  | 2.24389x10 <sup>-10</sup> | 1.962 [1.63 - Inf[ |
| rs2596526   | 31313724              | C/T  | 0.134 | 0.999 | C         | 167  | 8.15884x10 <sup>-06</sup> | 0.132264    | 0.997 | C  | 9.99385x10 <sup>-11</sup> | 1.997 [1.66 - Inf[ |
| rs2596524   | 31313906              | A/G  | 0.134 | 1     | A         | 167  | 8.10206x10 <sup>-06</sup> | 0.132368    | 0.998 | A  | 1.09354x10 <sup>-10</sup> | 1.993 [1.65 - Inf[ |
| rs7453967   | 31314243              | G/T  | 0.134 | 1     | G         | 165  | 8.26057x10 <sup>-06</sup> | 0.132291    | 0.997 | G  | 1.04372x10 <sup>-10</sup> | 1.995 [1.65 - Inf[ |
| rs4475359   | 31314298              | T/G  | 0.136 | 1     | T         | 164  | 8.91404x10 <sup>-06</sup> | 0.136445    | 0.987 | T  | 5.2197x10 <sup>-10</sup>  | 1.926 [1.6 - Inf[  |
| rs9265929   | 31314313              | C/T  | 0.134 | 1     | C         | 166  | 8.13151x10 <sup>-06</sup> | 0.132359    | 0.998 | C  | 1.10244x10 <sup>-10</sup> | 1.992 [1.65 - Inf[ |
| rs9265930   | 31314347              | A/C  | 0.134 | 1     | A         | 166  | 8.13151x10 <sup>-06</sup> | 0.132359    | 0.998 | A  | 1.10298x10 <sup>-10</sup> | 1.992 [1.65 - Inf[ |
| rs2508000   | 31314588              | T/C  | 0.134 | 1     | T         | 166  | 8.13151x10 <sup>-06</sup> | 0.132354    | 0.998 | T  | 1.10754x10 <sup>-10</sup> | 1.992 [1.65 - Inf[ |
| rs9265950   | 31315261              | C/A  | 0.134 | 0.999 | C         | 178  | 7.4791x10 <sup>-06</sup>  | 0.134039    | 0.989 | C  | 2.58221x10 <sup>-10</sup> | 1.96 [1.63 - Inf[  |
| rs9265959   | 31315425              | T/C  | 0.134 | 1     | T         | 166  | 8.13151x10 <sup>-06</sup> | 0.132336    | 0.998 | T  | 1.12515x10 <sup>-10</sup> | 1.992 [1.65 - Inf[ |
| rs9265963   | 31315540              | A/G  | 0.134 | 1     | A         | 166  | 8.13151x10 <sup>-06</sup> | 0.132334    | 0.998 | A  | 1.12709x10 <sup>-10</sup> | 1.991 [1.65 - Inf[ |
| rs2596520   | 31316481              | T/C  | 0.134 | 0.999 | T         | 166  | 8.31101x10 <sup>-06</sup> | 0.132288    | 0.998 | T  | 1.1321x10 <sup>-10</sup>  | 1.992 [1.65 - Inf[ |
| rs2596519   | 31316563              | T/A  | 0.134 | 0.999 | T         | 166  | 8.31101x10 <sup>-06</sup> | 0.132289    | 0.998 | T  | 1.13392x10 <sup>-10</sup> | 1.992 [1.65 - Inf[ |
| rs2596518   | 31316759              | G/A  | 0.134 | 1     | G         | 166  | 8.13487x10 <sup>-06</sup> | 0.132313    | 0.998 | G  | 1.14603x10 <sup>-10</sup> | 1.991 [1.65 - Inf[ |

| SNP         | Position <sup>§</sup> | m/M     | MAF   | info  | Discovery |      |                           |           | Replication |       |                           |                    |
|-------------|-----------------------|---------|-------|-------|-----------|------|---------------------------|-----------|-------------|-------|---------------------------|--------------------|
|             |                       |         |       |       | RA        | nfam | P                         | MAF       | info        | RA    | P**                       | OR** [95% CI]      |
| rs2523620   | 31317514              | C/A     | 0.134 | 1     | C         | 167  | 8.11875x10 <sup>-06</sup> | 0.132311  | 0.998       | C     | 1.15886x10 <sup>-10</sup> | 1.991 [1.65 - Inf[ |
| rs2596515   | 31317619              | A/G     | 0.134 | 1     | A         | 167  | 8.11061x10 <sup>-06</sup> | 0.13231   | 0.998       | A     | 1.16083x10 <sup>-10</sup> | 1.991 [1.65 - Inf[ |
| rs2596513   | 31317762              | G/A     | 0.134 | 1     | G         | 167  | 8.09789x10 <sup>-06</sup> | 0.132309  | 0.997       | G     | 1.16282x10 <sup>-10</sup> | 1.991 [1.65 - Inf[ |
| rs2596511   | 31317855              | T/A     | 0.134 | 1     | T         | 169  | 8.08291x10 <sup>-06</sup> | 0.13237   | 0.997       | T     | 1.23237x10 <sup>-10</sup> | 1.989 [1.65 - Inf[ |
| rs2523618   | 31318303              | C/T     | 0.134 | 0.999 | C         | 171  | 7.82489x10 <sup>-06</sup> | 0.132286  | 0.996       | C     | 1.21028x10 <sup>-10</sup> | 1.991 [1.65 - Inf[ |
| rs2442724   | 31319907              | C/T     | 0.134 | 0.998 | C         | 177  | 5.98684x10 <sup>-06</sup> | 0.132108  | 0.985       | C     | 1.77509x10 <sup>-10</sup> | 1.985 [1.64 - Inf[ |
| rs1065386   | 31324547              | C/G     | 0.442 | 0.945 | G         | 421  | 3.87273x10 <sup>-07</sup> | 0.442768  | 0.83        | G     | 0.00413253                | 0.82 ]0 - 0.93]    |
| rs1050570   | 31324549              | C/T     | 0.442 | 0.945 | T         | 421  | 3.8725x10 <sup>-07</sup>  | 0.442768  | 0.83        | T     | 0.004132705               | 0.82 ]0 - 0.93]    |
| rs2523656   | 31444048              | C/G     | 0.469 | 0.995 | G         | 330  | 9.65793x10 <sup>-06</sup> | 0.461882  | 0.949       | G     | 0.0169342                 | 0.863 ]0 - 0.97]   |
| rs2523647   | 31449778              | G/A     | 0.457 | 0.994 | A         | 339  | 2.61139x10 <sup>-06</sup> | 0.452727  | 0.958       | A     | 0.00641935                | 0.842 ]0 - 0.94]   |
| rs78485683  | 31456691              | CTT/CT  | 0.394 | 0.987 | CT        | 358  | 9.15212x10 <sup>-06</sup> | 0.401221  | 0.976       | CT    | 0.134367                  | 0.925 ]0 - 1.04]   |
| rs10661543  | 31462605              | CAAAA/C | 0.188 | 0.993 | C         | 259  | 7.77775x10 <sup>-06</sup> | 0.206645  | 0.929       | CAAAA | 0.5                       | ns                 |
| rs375883533 | 31470020              | A/G     | 0.083 | 0.978 | A         | 111  | 9.74943x10 <sup>-06</sup> | 0.0685344 | 0.926       | A     | 1.35607x10 <sup>-09</sup> | 2.568 [1.94 - Inf[ |
| rs3830668   | 31502882              | A/ATGT  | 0.181 | 0.992 | ATGT      | 254  | 5.22218x10 <sup>-06</sup> | 0.199162  | 0.967       | ATGT  | 0.4264245                 | 0.984 ]0 - 1.13]   |
| rs61523215  | 32415606              | A/AT    | 0.176 | 0.981 | AT        | 241  | 5.09436x10 <sup>-06</sup> | 0.16619   | 0.857       | AT    | 0.00476605                | 0.778 ]0 - 0.91]   |
| rs116673414 | 32593097              | G/T     | 0.151 | 0.978 | G         | 217  | 7.9479x10 <sup>-06</sup>  | 0.145342  | 0.938       | G     | 7.2913x10 <sup>-09</sup>  | 1.828 [1.52 - Inf[ |
| rs35675538  | 32593127              | T/C     | 0.151 | 0.978 | T         | 217  | 8.18407x10 <sup>-06</sup> | 0.147271  | 0.945       | T     | 1.38032x10 <sup>-08</sup> | 1.796 [1.5 - Inf[  |
| rs9272346   | 32604372              | G/A     | 0.469 | 0.904 | G         | 430  | 5.47794x10 <sup>-06</sup> | 0.429895  | 0.86        | G     | 6.5357x10 <sup>-13</sup>  | 1.71 [1.51 - Inf[  |
| rs3187964   | 32605207              | C/G     | 0.457 | 0.916 | C         | 419  | 1.28095x10 <sup>-06</sup> | 0.426129  | 0.863       | C     | 5.2794x10 <sup>-13</sup>  | 1.717 [1.51 - Inf[ |
| rs707951    | 32609813              | T/C     | 0.313 | 0.976 | T         | 343  | 3.37407x10 <sup>-06</sup> | 0.274689  | 0.841       | T     | 2.96954x10 <sup>-10</sup> | 1.696 [1.47 - Inf[ |
| rs9272776   | 32610270              | T/C     | 0.349 | 0.982 | T         | 366  | 6.55514x10 <sup>-06</sup> | 0.309258  | 0.866       | T     | 3.77476x10 <sup>-10</sup> | 1.649 [1.44 - Inf[ |
| rs78570891  | 32611590              | G/A     | 0.365 | 0.946 | G         | 427  | 2.73452x10 <sup>-06</sup> | 0.338893  | 0.806       | G     | 3.66137x10 <sup>-09</sup> | 1.605 [1.4 - Inf[  |
| rs9273508   | 32628439              | A/G     | 0.295 | 0.974 | G         | 378  | 7.2503x10 <sup>-06</sup>  | 0.324356  | 0.897       | G     | 0.000165505               | 0.763 ]0 - 0.86]   |
| rs17212014  | 32637472              | T/C     | 0.206 | 0.935 | C         | 365  | 6.13472x10 <sup>-07</sup> | 0.222999  | 0.826       | C     | 0.0401682                 | 0.857 ]0 - 0.99]   |
| rs28371211  | 32637528              | A/C     | 0.209 | 0.941 | C         | 363  | 3.47303x10 <sup>-07</sup> | 0.225738  | 0.835       | C     | 0.02366855                | 0.841 ]0 - 0.97]   |

RA = risk allele; MAF = minor allele frequency; info = information; OR = odds ratio

<sup>§</sup> positions are given according to the hg19 genome build

\* with respect to the minor allele

# one-tailed test

Table S6. LD-based clumping of replicated SNPs within the HLA region in the case/control replication sample

| Lead SNP    | Discovery <i>P</i>     | Replication <i>P</i> * | Clumped SNPs                                                                                                                                                                                                                                                                                                                                                                                                                                                                                                                                                                                                                                                                                                                                                                                                                                                                                                                                                                                                                                                                                                                                                                                                                                                                                                                                                                                                                                                                                                                                                                                                                                                                                                                                                                                                                                                                                                                                                                                                                                                                                                                                                                                                                                                                                                                                                                                                                                                                                                                                                                                                                                                                                                                                                                                                                                                                                                                                                                                                                                                                                                                       |
|-------------|------------------------|------------------------|------------------------------------------------------------------------------------------------------------------------------------------------------------------------------------------------------------------------------------------------------------------------------------------------------------------------------------------------------------------------------------------------------------------------------------------------------------------------------------------------------------------------------------------------------------------------------------------------------------------------------------------------------------------------------------------------------------------------------------------------------------------------------------------------------------------------------------------------------------------------------------------------------------------------------------------------------------------------------------------------------------------------------------------------------------------------------------------------------------------------------------------------------------------------------------------------------------------------------------------------------------------------------------------------------------------------------------------------------------------------------------------------------------------------------------------------------------------------------------------------------------------------------------------------------------------------------------------------------------------------------------------------------------------------------------------------------------------------------------------------------------------------------------------------------------------------------------------------------------------------------------------------------------------------------------------------------------------------------------------------------------------------------------------------------------------------------------------------------------------------------------------------------------------------------------------------------------------------------------------------------------------------------------------------------------------------------------------------------------------------------------------------------------------------------------------------------------------------------------------------------------------------------------------------------------------------------------------------------------------------------------------------------------------------------------------------------------------------------------------------------------------------------------------------------------------------------------------------------------------------------------------------------------------------------------------------------------------------------------------------------------------------------------------------------------------------------------------------------------------------------------|
| rs114598080 | 3.90x10 <sup>-06</sup> | 4.39x10 <sup>-11</sup> | rs72855954, 6:31264583:G:T, rs111411820, rs112030670, rs112056872, rs112758902, rs112815193, rs113288104, rs113390008, rs113565451, rs113831989, rs114015300, rs114016160, rs114020623, rs114093160, rs114110521, rs114206206, rs114240643, rs114265643, rs114294380, rs114392121, rs114454776, rs114475699, rs114489270, rs114500903, rs114583506, rs114601085, rs114601215, rs114612857, rs114770325, rs114798972, rs114899495, rs114904826, rs114973736, rs115007911, rs115042633, rs115101855, rs115106318, rs115175858, rs115182712, rs115219503, rs115226524, rs115228090, rs115482903, rs115491491, rs115494471, rs115504545, rs115545796, rs115651636, rs115667045, rs115699806, rs115700453, rs115727572, rs115737821, rs115748458, rs115753074, rs115805679, rs115865502, rs115931507, rs115964138, rs115973915, rs115975714, rs116030808, rs116134275, rs116165038, rs116281893, rs116334679, rs116337797, rs116350468, rs116364562, rs116405890, rs116452682, rs116506525, rs116537416, rs116548532, rs116647350, rs116654277, rs116736925, rs117127791, rs12662096, rs12662501, rs12662527, rs12662550, rs12663075, rs12664433, rs12665166, rs12665531, rs138693838, rs138758697, rs139795635, rs139975409, rs141206831, rs141822551, rs145021772, rs146303266, rs147841590, rs149432671, rs16899170, rs16899178, rs16899203, rs17191040, rs17192281, rs17192288, rs17192295, rs17192302, rs17192323, rs17192393, rs17192421, rs17192470, rs17192491, rs17192498, rs17192505, rs17192512, rs17192533, rs17197402, rs17198664, rs17198706, rs17198776, rs17198783, rs17198811, rs17198818, rs17198839, rs17198860, rs17198909, rs182445956, rs187999352, rs189616187, rs189869162, rs192233466, rs199720990, rs199987285, rs200307568, rs200436274, rs201234764, rs201641102, rs201734761, rs2253489, rs2394887, rs2394897, rs2394904, rs2442724, rs2508000, rs2523618, rs2523620, rs2596511, rs2596513, rs2596515, rs2596518, rs2596519, rs2596520, rs2596524, rs2596526, rs28383843, rs28457789, rs2854006, rs2854007, rs28709322, rs34115632, rs34187356, rs34254374, rs34332804, rs34504767, rs34505728, rs34743644, rs34925694, rs35196124, rs35206735, rs35235581, rs35298376, rs35389342, rs35391481, rs35401506, rs35611056, rs35626283, rs35667233, rs35742578, rs35870025, rs35891864, rs35933419, rs36060788, rs36087596, rs367893790, rs371249684, rs3734869, rs375883533, rs377461698, rs3828860, rs3869118, rs3899471, rs3915970, rs4084262, rs4332019, rs4475359, rs4516988, rs4713440, rs55651925, rs55685143, rs55783607, rs55793836, rs55822325, rs55825863, rs55839536, rs55918251, rs55993314, rs56016471, rs56042166, rs56138398, rs56178408, rs56184612, rs56210254, rs56328367, rs56332747, rs56375204, rs56409019, rs57599285, rs57742463, rs58022700, rs58114162, rs58410461, rs58860177, rs59217589, rs6913631, rs6913894, rs72863879, rs73392854, rs73728770, rs73728779, rs73728781, rs7453967, rs78950083, rs9265929, rs9265930, rs9265950, rs9265959, rs9265963, rs9468884, rs9468885, rs9468886, rs9468913, rs9500884, rs9501079, rs9501082, rs9501351, rs9501506, rs9501507, rs9501513 |
| rs2853946   | 1.11x10 <sup>-07</sup> | 5.05x10 <sup>-06</sup> | rs2524152, rs2524150, rs2524149, rs2524147, rs2524146, rs2256583, rs2524039, rs2524042, rs2524044, rs2524049, rs373238011, rs2524057, rs9461650, rs2394945                                                                                                                                                                                                                                                                                                                                                                                                                                                                                                                                                                                                                                                                                                                                                                                                                                                                                                                                                                                                                                                                                                                                                                                                                                                                                                                                                                                                                                                                                                                                                                                                                                                                                                                                                                                                                                                                                                                                                                                                                                                                                                                                                                                                                                                                                                                                                                                                                                                                                                                                                                                                                                                                                                                                                                                                                                                                                                                                                                         |

| Lead SNP    | Discovery <i>P</i>     | Replication <i>P</i> * | Clumped SNPs                                                                                                                                                                                                                                                                                        |
|-------------|------------------------|------------------------|-----------------------------------------------------------------------------------------------------------------------------------------------------------------------------------------------------------------------------------------------------------------------------------------------------|
| rs3094197   | 5.25x10 <sup>-07</sup> | 2.38x10 <sup>-05</sup> | rs3131005, rs3094199                                                                                                                                                                                                                                                                                |
| rs2844633   | 1.73x10 <sup>-08</sup> | 4.20x10 <sup>-04</sup> | rs2844634, 6:31085340:G:A, 6:31091642:C:G, rs10947140, rs1265082, rs1265107, rs1265110, rs1265113, rs1265160, rs1265163, rs28383830, rs3094196, rs707913, rs9281239                                                                                                                                 |
| rs2524084   | 3.33x10 <sup>-06</sup> | 5.01x10 <sup>-04</sup> | rs79997604, rs2394898                                                                                                                                                                                                                                                                               |
| rs9264181   | 6.92x10 <sup>-06</sup> | 1.91x10 <sup>-02</sup> | 6:31091862, 6:31208289:CATG:C, rs2394907, rs3095250, rs3095257, rs3130434, rs3130435, rs3130534, rs3130540, rs9264179, rs9264180, rs9264183, rs9264184, rs9264186, rs9264187, rs9264188                                                                                                             |
| rs3187964   | 1.28x10 <sup>-06</sup> | 5.28x10 <sup>-13</sup> | rs9272346, rs707951, rs9272776, rs78570891                                                                                                                                                                                                                                                          |
| rs116673414 | 7.95x10 <sup>-06</sup> | 7.29x10 <sup>-09</sup> | rs35675538                                                                                                                                                                                                                                                                                          |
| rs1265048   | 8.72x10 <sup>-06</sup> | 1.58x10 <sup>-06</sup> |                                                                                                                                                                                                                                                                                                     |
| rs3094194   | 1.43x10 <sup>-08</sup> | 5.03x10 <sup>-06</sup> |                                                                                                                                                                                                                                                                                                     |
| rs3095309   | 8.16x10 <sup>-09</sup> | 9.46x10 <sup>-05</sup> | 6:31091862, 6:31090672:A:G, 6:31090945:C:T, 6:31091163:G:A, 6:31091447:C:T                                                                                                                                                                                                                          |
| rs9273508   | 7.25x10 <sup>-06</sup> | 1.66x10 <sup>-04</sup> | rs28371211, rs17212014                                                                                                                                                                                                                                                                              |
| rs6921855   | 1.13x10 <sup>-06</sup> | 2.34x10 <sup>-04</sup> | 6:31252667:T:C, 6:31252722:A:G, 6:31252747:T:C, 6:31252882:C:T, rs10947169, rs148136265, rs16899147, rs17198727, rs2524075, rs369387030, rs3873377, rs6899660, rs6916525, rs6939681, rs72861464, rs72861465, rs9295969, rs9348864, rs9357122, rs9366776, rs9368671, rs9380236, rs9394051, rs9394052 |
| rs3132557   | 6.16x10 <sup>-06</sup> | 2.98x10 <sup>-04</sup> |                                                                                                                                                                                                                                                                                                     |
| rs2524058   | 1.77x10 <sup>-06</sup> | 6.35x10 <sup>-04</sup> | rs2844605, rs2844606                                                                                                                                                                                                                                                                                |
| rs1065386   | 3.87x10 <sup>-07</sup> | 4.13x10 <sup>-03</sup> | rs1050570                                                                                                                                                                                                                                                                                           |
| rs61523215  | 5.09x10 <sup>-06</sup> | 4.77x10 <sup>-03</sup> |                                                                                                                                                                                                                                                                                                     |
| rs2523647   | 2.61x10 <sup>-06</sup> | 6.42x10 <sup>-03</sup> | rs2523656                                                                                                                                                                                                                                                                                           |

\* one-tailed test

Table S7. Results of the multivariate analysis within the HLA region in the case/control replication sample

| SNP<br>(chr:position <sup>\$</sup> ) | m/M | Gene            | MAF  | Discovery GWAS         |                    | Replication cohort     |                           |                        |                           |
|--------------------------------------|-----|-----------------|------|------------------------|--------------------|------------------------|---------------------------|------------------------|---------------------------|
|                                      |     |                 |      | Univariate analysis    |                    | Univariate analysis    |                           | Multivariate analysis  |                           |
|                                      |     |                 |      | <i>P</i>               | OR [CI 95%]        | <i>P</i> <sup>#</sup>  | OR <sup>*#</sup> [CI 95%] | <i>P</i> <sup>#</sup>  | OR <sup>*#</sup> [CI 95%] |
| rs1265048<br>(6:31081409)            | C/T | <i>C6orf15</i>  | 0.49 | 8.72x10 <sup>-06</sup> | 0.63 [0.52 -0.63]  | 1.58x10 <sup>-06</sup> | 0.72 ]0 - 0.81]           | 1.11x10 <sup>-02</sup> | 0.83 [0.72-0.96]          |
| rs114598080<br>(6:31255442)          | A/G | <i>HLA-C</i>    | 0.10 | 3.90x10 <sup>-06</sup> | 1.85 [1.39 -2.44]  | 4.39x10 <sup>-11</sup> | 2.06 [1.7 - Inf[          | 3.75x10 <sup>-05</sup> | 1.64 [1.29 -2.09]         |
| rs3187964<br>(6:32605207)            | C/G | <i>HLA-DQA1</i> | 0.41 | 1.28x10 <sup>-06</sup> | 1.52 [1.25 - 1.85] | 5.28x10 <sup>-13</sup> | 1.72 [1.51 - Inf[         | 7.80x10 <sup>-08</sup> | 1.53 [1.31 - 1.79]        |
| rs1065386<br>(6:31324547)            | C/G | <i>HLA-B</i>    | 0.44 | 3.87x10 <sup>-07</sup> | 0.57 [0.37-0.78]   | 4.13x10 <sup>-03</sup> | 0.82 ]0 - 0.93]           | 2.20x10 <sup>-01</sup> |                           |

m/M = minor/Major alleles; MAF = minor allele frequency; OR = odds ratio; CI = confidence interval

<sup>\$</sup> positions are given according to the hg19 genome build

\* with respect to the minor allele

<sup>#</sup> one-tailed test

Table S8. SNPs in high linkage disequilibrium ( $r^2>0.8$ ) with rs114598080 in the 1000 genomes KHV population

| SNP Id      | Position <sup>s</sup> | Alleles | MAF    | Distance | Dprime | R <sup>2</sup> | Correlated Alleles | RegulomeDB | Function | GWAS <i>P</i>             | Replication <i>P</i> <sup>#</sup> |
|-------------|-----------------------|---------|--------|----------|--------|----------------|--------------------|------------|----------|---------------------------|-----------------------------------|
| rs73392854  | 31249326              | (A/G)   | 0.1212 | -6116    | 1      | 1              | G=A,A=G            | 6          | NA       | 3.95785x10 <sup>-06</sup> | 1.45965x10 <sup>-11</sup>         |
| rs28383843  | 31249893              | (-/T)   | 0.1212 | -5549    | 1      | 1              | G=-,A=T            | 6          | NA       | 3.73449x10 <sup>-06</sup> | 1.48942x10 <sup>-11</sup>         |
| rs141206831 | 31249358              | (AAG/-) | 0.1212 | -6084    | 1      | 1              | G=AAG,A=-          | .          | NA       | 4.35254x10 <sup>-06</sup> | 1.64104x10 <sup>-11</sup>         |
| rs189616187 | 31248995              | (C/T)   | 0.1212 | -6447    | 1      | 1              | G=C,A=T            | 6          | NA       | 3.91138x10 <sup>-06</sup> | 2.06818x10 <sup>-11</sup>         |
| rs73728770  | 31248887              | (G/C)   | 0.1212 | -6555    | 1      | 1              | G=G,A=C            | 7          | NA       | 3.89267x10 <sup>-06</sup> | 2.1005x10 <sup>-11</sup>          |
| rs58114162  | 31248825              | (C/T)   | 0.1212 | -6617    | 1      | 1              | G=C,A=T            | 7          | NA       | 3.88432x10 <sup>-06</sup> | 2.11841x10 <sup>-11</sup>         |
| rs17198706  | 31248693              | (C/G)   | 0.1212 | -6749    | 1      | 1              | G=C,A=G            | 7          | NA       | 3.86318x10 <sup>-06</sup> | 2.15749x10 <sup>-11</sup>         |
| rs17192323  | 31248324              | (C/T)   | 0.1212 | -7118    | 1      | 1              | G=C,A=T            | 6          | NA       | 3.81642x10 <sup>-06</sup> | 2.25474x10 <sup>-11</sup>         |
| rs17192302  | 31248256              | (C/T)   | 0.1212 | -7186    | 1      | 1              | G=C,A=T            | 7          | NA       | 3.80848x10 <sup>-06</sup> | 2.27169x10 <sup>-11</sup>         |
| rs17192295  | 31248114              | (C/T)   | 0.1212 | -7328    | 1      | 1              | G=C,A=T            | 7          | NA       | 3.79358x10 <sup>-06</sup> | 2.30558x10 <sup>-11</sup>         |
| rs17192288  | 31248091              | (G/A)   | 0.1212 | -7351    | 1      | 1              | G=G,A=A            | 6          | NA       | 3.79097x10 <sup>-06</sup> | 2.31154x10 <sup>-11</sup>         |
| rs28709322  | 31247804              | (G/A)   | 0.1212 | -7638    | 1      | 1              | G=G,A=A            | 6          | NA       | 3.76227x10 <sup>-06</sup> | 2.3711x10 <sup>-11</sup>          |
| rs28457789  | 31247801              | (T/G)   | 0.1212 | -7641    | 1      | 1              | G=T,A=G            | 6          | NA       | 3.76142x10 <sup>-06</sup> | 2.38057x10 <sup>-11</sup>         |
| rs9468913   | 31244332              | (C/T)   | 0.1212 | -11110   | 1      | 1              | G=C,A=T            | 7          | NA       | 3.6746x10 <sup>-06</sup>  | 3.0757x10 <sup>-11</sup>          |
| rs17198783  | 31256746              | (T/C)   | 0.1212 | 1304     | 1      | 1              | G=T,A=C            | 5          | NA       | 3.94836x10 <sup>-06</sup> | 4.19371x10 <sup>-11</sup>         |
| rs35611056  | 31261956              | (A/G)   | 0.1212 | 6514     | 1      | 1              | G=A,A=G            | 7          | NA       | 3.99833x10 <sup>-06</sup> | 4.28072x10 <sup>-11</sup>         |
| rs34187356  | 31261983              | (T/C)   | 0.1212 | 6541     | 1      | 1              | G=T,A=C            | 5          | NA       | 3.99833x10 <sup>-06</sup> | 4.28072x10 <sup>-11</sup>         |
| rs56042166  | 31262024              | (A/G)   | 0.1212 | 6582     | 1      | 1              | G=A,A=G            | 5          | NA       | 3.99833x10 <sup>-06</sup> | 4.28072x10 <sup>-11</sup>         |
| rs17192505  | 31265910              | (T/G)   | 0.1212 | 10468    | 1      | 1              | G=T,A=G            | 5          | NA       | 4.00172x10 <sup>-06</sup> | 4.31903x10 <sup>-11</sup>         |
| rs56138398  | 31269299              | (G/C)   | 0.1212 | 13857    | 1      | 1              | G=G,A=C            | 5          | NA       | 3.99833x10 <sup>-06</sup> | 4.32352x10 <sup>-11</sup>         |
| rs35196124  | 31261777              | (A/T)   | 0.1212 | 6335     | 1      | 1              | G=A,A=T            | 7          | NA       | 3.99833x10 <sup>-06</sup> | 4.32733x10 <sup>-11</sup>         |
| rs35933419  | 31261781              | (A/G)   | 0.1212 | 6339     | 1      | 1              | G=A,A=G            | 7          | NA       | 3.99833x10 <sup>-06</sup> | 4.32733x10 <sup>-11</sup>         |
| rs114265643 | 31261851              | (C/T)   | 0.1212 | 6409     | 1      | 1              | G=C,A=T            | 6          | NA       | 3.99833x10 <sup>-06</sup> | 4.32733x10 <sup>-11</sup>         |
| rs187999352 | 31261887              | (A/T)   | 0.1212 | 6445     | 1      | 1              | G=A,A=T            | 6          | NA       | 3.99833x10 <sup>-06</sup> | 4.32733x10 <sup>-11</sup>         |
| rs192233466 | 31261888              | (T/A)   | 0.1212 | 6446     | 1      | 1              | G=T,A=A            | 6          | NA       | 3.99833x10 <sup>-06</sup> | 4.32733x10 <sup>-11</sup>         |
| rs34504767  | 31261492              | (C/T)   | 0.1212 | 6050     | 1      | 1              | G=C,A=T            | 3a         | NA       | 3.99833x10 <sup>-06</sup> | 4.32812x10 <sup>-11</sup>         |
| rs115748458 | 31261570              | (T/G)   | 0.1212 | 6128     | 1      | 1              | G=T,A=G            | 7          | NA       | 3.99833x10 <sup>-06</sup> | 4.32812x10 <sup>-11</sup>         |

| SNP Id      | Position <sup>s</sup> | Alleles | MAF    | Distance | Dprime | R <sup>2</sup> | Correlated Alleles | RegulomeDB | Function | GWAS <i>P</i>             | Replication <i>P</i> <sup>#</sup> |
|-------------|-----------------------|---------|--------|----------|--------|----------------|--------------------|------------|----------|---------------------------|-----------------------------------|
| rs116134275 | 31261571              | (T/C)   | 0.1212 | 6129     | 1      | 1              | G=T,A=C            | 7          | NA       | 3.99833x10 <sup>-06</sup> | 4.32812x10 <sup>-11</sup>         |
| rs35742578  | 31261645              | (G/A)   | 0.1212 | 6203     | 1      | 1              | G=G,A=A            | 7          | NA       | 3.99833x10 <sup>-06</sup> | 4.32812x10 <sup>-11</sup>         |
| rs116647350 | 31268833              | (G/A)   | 0.1212 | 13391    | 1      | 1              | G=G,A=A            | 4          | NA       | 3.99833x10 <sup>-06</sup> | 4.33426x10 <sup>-11</sup>         |
| rs12663075  | 31269256              | (C/A)   | 0.1212 | 13814    | 1      | 1              | G=C,A=A            | 5          | NA       | 3.99833x10 <sup>-06</sup> | 4.33811x10 <sup>-11</sup>         |
| rs201641102 | 31267776              | (A/G)   | 0.1212 | 12334    | 1      | 1              | G=A,A=G            | 6          | NA       | 3.99833x10 <sup>-06</sup> | 4.33859x10 <sup>-11</sup>         |
| rs115491491 | 31266465              | (A/G)   | 0.1212 | 11023    | 1      | 1              | G=A,A=G            | 7          | NA       | 4.00002x10 <sup>-06</sup> | 4.37064x10 <sup>-11</sup>         |
| rs116364562 | 31266479              | (G/C)   | 0.1212 | 11037    | 1      | 1              | G=G,A=C            | 7          | NA       | 4.00002x10 <sup>-06</sup> | 4.37064x10 <sup>-11</sup>         |
| rs114093160 | 31258371              | (G/A)   | 0.1212 | 2929     | 1      | 1              | G=G,A=A            | 7          | NA       | 4.00562x10 <sup>-06</sup> | 4.37174x10 <sup>-11</sup>         |
| rs17192512  | 31265914              | (A/G)   | 0.1212 | 10472    | 1      | 1              | G=A,A=G            | 5          | NA       | 4.00002x10 <sup>-06</sup> | 4.37245x10 <sup>-11</sup>         |
| rs17198860  | 31265875              | (G/A)   | 0.1212 | 10433    | 1      | 1              | G=G,A=A            | 5          | NA       | 4.00002x10 <sup>-06</sup> | 4.37294x10 <sup>-11</sup>         |
| rs139795635 | 31266411              | (-/A)   | 0.1212 | 10969    | 1      | 1              | G=-,A=A            | 7          | NA       | 4.00002x10 <sup>-06</sup> | 4.37304x10 <sup>-11</sup>         |
| rs16899178  | 31261137              | (C/T)   | 0.1212 | 5695     | 1      | 1              | G=C,A=T            | 2b         | NA       | 3.99833x10 <sup>-06</sup> | 4.37508x10 <sup>-11</sup>         |
| rs138758697 | 31266310              | (G/-)   | 0.1212 | 10868    | 1      | 1              | G=G,A=-            | .          | NA       | 4.00002x10 <sup>-06</sup> | 4.37559x10 <sup>-11</sup>         |
| rs16899203  | 31266335              | (T/C)   | 0.1212 | 10893    | 1      | 1              | G=T,A=C            | 7          | NA       | 4.00002x10 <sup>-06</sup> | 4.37718x10 <sup>-11</sup>         |
| rs17192491  | 31265788              | (C/G)   | 0.1212 | 10346    | 1      | 1              | G=C,A=G            | 5          | NA       | 4.00002x10 <sup>-06</sup> | 4.37889x10 <sup>-11</sup>         |
| rs17198839  | 31265807              | (A/C)   | 0.1212 | 10365    | 1      | 1              | G=A,A=C            | 5          | NA       | 4.00002x10 <sup>-06</sup> | 4.37889x10 <sup>-11</sup>         |
| rs17198818  | 31265695              | (G/A)   | 0.1212 | 10253    | 1      | 1              | G=G,A=A            | 7          | NA       | 4.00139x10 <sup>-06</sup> | 4.38258x10 <sup>-11</sup>         |
| rs3828860   | 31265736              | (C/T)   | 0.1212 | 10294    | 1      | 1              | G=C,A=T            | 7          | NA       | 4.00139x10 <sup>-06</sup> | 4.3826x10 <sup>-11</sup>          |
| rs17192470  | 31265743              | (C/T)   | 0.1212 | 10301    | 1      | 1              | G=C,A=T            | 5          | NA       | 4.00275x10 <sup>-06</sup> | 4.38339x10 <sup>-11</sup>         |
| rs17198811  | 31265634              | (C/T)   | 0.1212 | 10192    | 1      | 1              | G=C,A=T            | 6          | NA       | 4.00275x10 <sup>-06</sup> | 4.38595x10 <sup>-11</sup>         |
| rs115975714 | 31265242              | (T/G)   | 0.1212 | 9800     | 1      | 1              | G=T,A=G            | 7          | NA       | 4.00617x10 <sup>-06</sup> | 4.38807x10 <sup>-11</sup>         |
| rs115219503 | 31262959              | (T/C)   | 0.1212 | 7517     | 1      | 1              | G=T,A=C            | 7          | NA       | 3.99833x10 <sup>-06</sup> | 4.38813x10 <sup>-11</sup>         |
| rs114598080 | 31255442              | (G/A)   | 0.1212 | 0        | 1      | 1              | G=G,A=A            | 7          | NA       | 3.9016x10 <sup>-06</sup>  | 4.39264x10 <sup>-11</sup>         |
| rs114904826 | 31264960              | (T/C)   | 0.1212 | 9518     | 1      | 1              | G=T,A=C            | 7          | NA       | 4.01097x10 <sup>-06</sup> | 4.39264x10 <sup>-11</sup>         |
| rs114770325 | 31264845              | (T/C)   | 0.1212 | 9403     | 1      | 1              | G=T,A=C            | 7          | NA       | 4.01371x10 <sup>-06</sup> | 4.39264x10 <sup>-11</sup>         |
| rs115753074 | 31265168              | (G/A)   | 0.1212 | 9726     | 1      | 1              | G=G,A=A            | 6          | NA       | 4.00754x10 <sup>-06</sup> | 4.39324x10 <sup>-11</sup>         |
| rs200436274 | 31264580              | (C/-)   | 0.1212 | 9138     | 1      | 1              | G=C,A=-            | .          | NA       | 4.01494x10 <sup>-06</sup> | 4.39503x10 <sup>-11</sup>         |
| .           | 31264583              | (G/T)   | 0.1212 | 9141     | 1      | 1              | G=G,A=T            | 7          | .        | 4.01494x10 <sup>-06</sup> | 4.39503x10 <sup>-11</sup>         |
| rs115865502 | 31264178              | (C/T)   | 0.1212 | 8736     | 1      | 1              | G=C,A=T            | 6          | NA       | 4.01408x10 <sup>-06</sup> | 4.39582x10 <sup>-11</sup>         |



| SNP Id      | Position <sup>s</sup> | Alleles | MAF    | Distance | Dprime | R <sup>2</sup> | Correlated Alleles | RegulomeDB | Function | GWAS <i>P</i>             | Replication <i>P</i> <sup>#</sup> |
|-------------|-----------------------|---------|--------|----------|--------|----------------|--------------------|------------|----------|---------------------------|-----------------------------------|
| rs115700453 | 31264577              | (T/C)   | 0.1212 | 9135     | 1      | 1              | G=T,A=C            | 7          | NA       | 4.01494x10 <sup>-06</sup> | 4.39582x10 <sup>-11</sup>         |
| rs115494471 | 31264408              | (C/T)   | 0.1212 | 8966     | 1      | 1              | G=C,A=T            | 7          | NA       | 4.01494x10 <sup>-06</sup> | 4.39583x10 <sup>-11</sup>         |
| rs114973736 | 31264497              | (T/C)   | 0.1212 | 9055     | 1      | 1              | G=T,A=C            | 6          | NA       | 4.01494x10 <sup>-06</sup> | 4.39583x10 <sup>-11</sup>         |
| rs115964138 | 31264512              | (G/A)   | 0.1212 | 9070     | 1      | 1              | G=G,A=A            | 6          | NA       | 4.01494x10 <sup>-06</sup> | 4.39583x10 <sup>-11</sup>         |
| rs116334679 | 31264517              | (T/C)   | 0.1212 | 9075     | 1      | 1              | G=T,A=C            | 6          | NA       | 4.01494x10 <sup>-06</sup> | 4.39583x10 <sup>-11</sup>         |
| rs114601085 | 31263548              | (C/T)   | 0.1212 | 8106     | 1      | 1              | G=C,A=T            | 7          | NA       | 4.00583x10 <sup>-06</sup> | 4.39742x10 <sup>-11</sup>         |
| rs114294380 | 31263601              | (T/G)   | 0.1212 | 8159     | 1      | 1              | G=T,A=G            | 7          | NA       | 4.00702x10 <sup>-06</sup> | 4.39742x10 <sup>-11</sup>         |
| rs115101855 | 31263482              | (A/T)   | 0.1212 | 8040     | 1      | 1              | G=A,A=T            | 6          | NA       | 4.00447x10 <sup>-06</sup> | 4.39742x10 <sup>-11</sup>         |
| rs114016160 | 31263410              | (G/A)   | 0.1212 | 7968     | 1      | 1              | G=G,A=A            | 7          | NA       | 4.00463x10 <sup>-06</sup> | 4.39742x10 <sup>-11</sup>         |
| rs114583506 | 31263801              | (G/T)   | 0.1212 | 8359     | 1      | 1              | G=G,A=T            | 7          | NA       | 4.00927x10 <sup>-06</sup> | 4.39742x10 <sup>-11</sup>         |
| rs200307568 | 31263721              | (G/T)   | 0.1212 | 8279     | 1      | 1              | G=G,A=T            | 7          | NA       | 4.0079x10 <sup>-06</sup>  | 4.39743x10 <sup>-11</sup>         |
| rs116165038 | 31263852              | (G/C)   | 0.1212 | 8410     | 1      | 1              | G=G,A=C            | 6          | NA       | 6.72289x10 <sup>-06</sup> | 4.39803x10 <sup>-11</sup>         |
| rs115973915 | 31263349              | (C/A)   | 0.1212 | 7907     | 1      | 1              | G=C,A=A            | 6          | NA       | 4.00378x10 <sup>-06</sup> | 4.39821x10 <sup>-11</sup>         |
| rs115667045 | 31262717              | (T/A)   | 0.1212 | 7275     | 1      | 1              | G=T,A=A            | 5          | NA       | 3.99833x10 <sup>-06</sup> | 4.39982x10 <sup>-11</sup>         |
| rs114899495 | 31262761              | (C/T)   | 0.1212 | 7319     | 1      | 1              | G=C,A=T            | 5          | NA       | 3.99833x10 <sup>-06</sup> | 4.39982x10 <sup>-11</sup>         |
| rs116654277 | 31262769              | (C/T)   | 0.1212 | 7327     | 1      | 1              | G=C,A=T            | 5          | NA       | 3.99833x10 <sup>-06</sup> | 4.39982x10 <sup>-11</sup>         |
| rs116405890 | 31262870              | (C/T)   | 0.1212 | 7428     | 1      | 1              | G=C,A=T            | 6          | NA       | 3.99833x10 <sup>-06</sup> | 4.39982x10 <sup>-11</sup>         |
| rs189869162 | 31262677              | (T/C)   | 0.1212 | 7235     | 1      | 1              | G=T,A=C            | 5          | NA       | 3.99833x10 <sup>-06</sup> | 4.39983x10 <sup>-11</sup>         |
| rs147841590 | 31259588              | (A/-)   | 0.1212 | 4146     | 1      | 1              | G=A,A=-            | .          | NA       | 4.00087x10 <sup>-06</sup> | 4.40336x10 <sup>-11</sup>         |
| rs114454776 | 31259605              | (G/A)   | 0.1212 | 4163     | 1      | 1              | G=G,A=A            | 6          | NA       | 4.00087x10 <sup>-06</sup> | 4.40336x10 <sup>-11</sup>         |
| rs55993314  | 31261056              | (C/T)   | 0.1212 | 5614     | 1      | 1              | G=C,A=T            | 7          | NA       | 3.99833x10 <sup>-06</sup> | 4.40382x10 <sup>-11</sup>         |
| rs56409019  | 31261358              | (C/G)   | 0.1212 | 5916     | 1      | 1              | G=C,A=G            | 4          | NA       | 3.99833x10 <sup>-06</sup> | 4.40383x10 <sup>-11</sup>         |
| rs55793836  | 31261393              | (C/T)   | 0.1212 | 5951     | 1      | 1              | G=C,A=T            | 4          | NA       | 3.99833x10 <sup>-06</sup> | 4.40383x10 <sup>-11</sup>         |
| rs116537416 | 31260633              | (T/C)   | 0.1212 | 5191     | 1      | 1              | G=T,A=C            | 6          | NA       | 4.00002x10 <sup>-06</sup> | 4.40383x10 <sup>-11</sup>         |
| rs114489270 | 31260583              | (T/C)   | 0.1212 | 5141     | 1      | 1              | G=T,A=C            | 7          | NA       | 4.00002x10 <sup>-06</sup> | 4.40462x10 <sup>-11</sup>         |
| rs116548532 | 31260594              | (T/G)   | 0.1212 | 5152     | 1      | 1              | G=T,A=G            | 7          | NA       | 4.00002x10 <sup>-06</sup> | 4.40462x10 <sup>-11</sup>         |
| rs114601215 | 31260462              | (C/G)   | 0.1212 | 5020     | 1      | 1              | G=C,A=G            | 6          | NA       | 4.00002x10 <sup>-06</sup> | 4.40463x10 <sup>-11</sup>         |
| rs35298376  | 31260040              | (T/G)   | 0.1212 | 4598     | 1      | 1              | G=T,A=G            | 6          | NA       | 4.00087x10 <sup>-06</sup> | 4.40463x10 <sup>-11</sup>         |
| rs35389342  | 31260049              | (T/C)   | 0.1212 | 4607     | 1      | 1              | G=T,A=C            | 6          | NA       | 4.00087x10 <sup>-06</sup> | 4.40463x10 <sup>-11</sup>         |

| SNP Id      | Position <sup>s</sup> | Alleles  | MAF    | Distance | Dprime | R <sup>2</sup> | Correlated Alleles | RegulomeDB | Function | GWAS <i>P</i>             | Replication <i>P</i> <sup>#</sup> |
|-------------|-----------------------|----------|--------|----------|--------|----------------|--------------------|------------|----------|---------------------------|-----------------------------------|
| rs35235581  | 31260105              | (G/A)    | 0.1212 | 4663     | 1      | 1              | G=G,A=A            | 7          | NA       | 4.00087x10 <sup>-06</sup> | 4.40463x10 <sup>-11</sup>         |
| rs35626283  | 31260168              | (-/T)    | 0.1212 | 4726     | 1      | 1              | G=-,A=T            | 7          | NA       | 4.00087x10 <sup>-06</sup> | 4.40463x10 <sup>-11</sup>         |
| rs114392121 | 31260185              | (T/C)    | 0.1212 | 4743     | 1      | 1              | G=T,A=C            | 7          | NA       | 4.00087x10 <sup>-06</sup> | 4.40463x10 <sup>-11</sup>         |
| rs115042633 | 31260201              | (T/A)    | 0.1212 | 4759     | 1      | 1              | G=T,A=A            | 7          | NA       | 4.00087x10 <sup>-06</sup> | 4.40463x10 <sup>-11</sup>         |
| rs117127791 | 31260398              | (A/G)    | 0.1212 | 4956     | 1      | 1              | G=A,A=G            | 6          | NA       | 4.00087x10 <sup>-06</sup> | 4.40463x10 <sup>-11</sup>         |
| rs34505728  | 31260004              | (C/A)    | 0.1212 | 4562     | 1      | 1              | G=C,A=A            | 6          | NA       | 4.00087x10 <sup>-06</sup> | 4.40542x10 <sup>-11</sup>         |
| rs35667233  | 31259269              | (T/C)    | 0.1212 | 3827     | 1      | 1              | G=T,A=C            | 6          | NA       | 4.00087x10 <sup>-06</sup> | 4.40544x10 <sup>-11</sup>         |
| rs34115632  | 31259298              | (A/G)    | 0.1212 | 3856     | 1      | 1              | G=A,A=G            | 7          | NA       | 4.00087x10 <sup>-06</sup> | 4.40544x10 <sup>-11</sup>         |
| rs36087596  | 31259299              | (T/-)    | 0.1212 | 3857     | 1      | 1              | G=T,A=-            | .          | NA       | 4.00087x10 <sup>-06</sup> | 4.40544x10 <sup>-11</sup>         |
| rs35401506  | 31259332              | (T/C)    | 0.1212 | 3890     | 1      | 1              | G=T,A=C            | 7          | NA       | 4.00087x10 <sup>-06</sup> | 4.40544x10 <sup>-11</sup>         |
| rs36060788  | 31259338              | (A/G)    | 0.1212 | 3896     | 1      | 1              | G=A,A=G            | 7          | NA       | 4.00087x10 <sup>-06</sup> | 4.40544x10 <sup>-11</sup>         |
| rs35870025  | 31259435              | (C/T)    | 0.1212 | 3993     | 1      | 1              | G=C,A=T            | 7          | NA       | 4.00087x10 <sup>-06</sup> | 4.40544x10 <sup>-11</sup>         |
| rs34743644  | 31259443              | (C/T)    | 0.1212 | 4001     | 1      | 1              | G=C,A=T            | 7          | NA       | 4.00087x10 <sup>-06</sup> | 4.40544x10 <sup>-11</sup>         |
| rs116506525 | 31259458              | (T/C)    | 0.1212 | 4016     | 1      | 1              | G=T,A=C            | 7          | NA       | 4.00087x10 <sup>-06</sup> | 4.40544x10 <sup>-11</sup>         |
| rs116030808 | 31259495              | (A/G)    | 0.1212 | 4053     | 1      | 1              | G=A,A=G            | 7          | NA       | 4.00087x10 <sup>-06</sup> | 4.40544x10 <sup>-11</sup>         |
| rs115175858 | 31259543              | (T/C)    | 0.1212 | 4101     | 1      | 1              | G=T,A=C            | 7          | NA       | 4.00087x10 <sup>-06</sup> | 4.40544x10 <sup>-11</sup>         |
| rs115106318 | 31259704              | (A/G)    | 0.1212 | 4262     | 1      | 1              | G=A,A=G            | 7          | NA       | 4.00087x10 <sup>-06</sup> | 4.40544x10 <sup>-11</sup>         |
| rs34332804  | 31259729              | (G/C)    | 0.1212 | 4287     | 1      | 1              | G=G,A=C            | 7          | NA       | 4.00087x10 <sup>-06</sup> | 4.40544x10 <sup>-11</sup>         |
| rs34254374  | 31259834              | (T/G)    | 0.1212 | 4392     | 1      | 1              | G=T,A=G            | 7          | NA       | 4.00087x10 <sup>-06</sup> | 4.40544x10 <sup>-11</sup>         |
| rs35206735  | 31259837              | (G/A)    | 0.1212 | 4395     | 1      | 1              | G=G,A=A            | 7          | NA       | 4.00087x10 <sup>-06</sup> | 4.40544x10 <sup>-11</sup>         |
| rs114500903 | 31259869              | (T/C)    | 0.1212 | 4427     | 1      | 1              | G=T,A=C            | 7          | NA       | 4.00087x10 <sup>-06</sup> | 4.40544x10 <sup>-11</sup>         |
| rs116452682 | 31259870              | (G/A)    | 0.1212 | 4428     | 1      | 1              | G=G,A=A            | 7          | NA       | 4.00087x10 <sup>-06</sup> | 4.40544x10 <sup>-11</sup>         |
| rs34925694  | 31259955              | (A/G)    | 0.1212 | 4513     | 1      | 1              | G=A,A=G            | 7          | NA       | 4.00087x10 <sup>-06</sup> | 4.40544x10 <sup>-11</sup>         |
| rs367893790 | 31258626              | (ATAT/-) | 0.1212 | 3184     | 1      | 1              | G=ATAT,A=-         | .          | NA       | 3.99833x10 <sup>-06</sup> | 4.40624x10 <sup>-11</sup>         |
| rs78950083  | 31258986              | (T/C)    | 0.1212 | 3544     | 1      | 1              | G=T,A=C            | 5          | NA       | 4.00087x10 <sup>-06</sup> | 4.40624x10 <sup>-11</sup>         |
| rs16899170  | 31259017              | (T/C)    | 0.1212 | 3575     | 1      | 1              | G=T,A=C            | 5          | NA       | 4.00087x10 <sup>-06</sup> | 4.40624x10 <sup>-11</sup>         |
| rs115651636 | 31257533              | (T/C)    | 0.1212 | 2091     | 1      | 1              | G=T,A=C            | 7          | NA       | 3.98147x10 <sup>-06</sup> | 4.40703x10 <sup>-11</sup>         |
| rs114110521 | 31257617              | (G/A)    | 0.1212 | 2175     | 1      | 1              | G=G,A=A            | 7          | NA       | 3.98398x10 <sup>-06</sup> | 4.40703x10 <sup>-11</sup>         |
| rs116337797 | 31257422              | (G/A)    | 0.1212 | 1980     | 1      | 1              | G=G,A=A            | 5          | NA       | 3.97645x10 <sup>-06</sup> | 4.40705x10 <sup>-11</sup>         |

| SNP Id      | Position <sup>s</sup> | Alleles        | MAF    | Distance | Dprime | R <sup>2</sup> | Correlated Alleles | RegulomeDB | Function | GWAS <i>P</i>             | Replication <i>P</i> <sup>#</sup> |
|-------------|-----------------------|----------------|--------|----------|--------|----------------|--------------------|------------|----------|---------------------------|-----------------------------------|
| rs115545796 | 31258036              | (A/C)          | 0.1212 | 2594     | 1      | 1              | G=A,A=C            | 6          | NA       | 3.98987x10 <sup>-06</sup> | 4.40705x10 <sup>-11</sup>         |
| rs182445956 | 31258046              | (T/C)          | 0.1212 | 2604     | 1      | 1              | G=T,A=C            | 6          | NA       | 3.98987x10 <sup>-06</sup> | 4.40705x10 <sup>-11</sup>         |
| rs115504545 | 31257251              | (A/G)          | 0.1212 | 1809     | 1      | 1              | G=A,A=G            | 5          | NA       | 3.96564x10 <sup>-06</sup> | 4.40785x10 <sup>-11</sup>         |
| rs115226524 | 31257120              | (T/C)          | 0.1212 | 1678     | 1      | 1              | G=T,A=C            | 7          | NA       | 3.95656x10 <sup>-06</sup> | 4.40866x10 <sup>-11</sup>         |
| rs115482903 | 31257198              | (G/A)          | 0.1212 | 1756     | 1      | 1              | G=G,A=A            | 6          | NA       | 3.96233x10 <sup>-06</sup> | 4.40866x10 <sup>-11</sup>         |
| rs116736925 | 31257229              | (G/A)          | 0.1212 | 1787     | 1      | 1              | G=G,A=A            | 7          | NA       | 3.96399x10 <sup>-06</sup> | 4.40866x10 <sup>-11</sup>         |
| rs55918251  | 31255811              | (A/G)          | 0.1212 | 369      | 1      | 1              | G=A,A=G            | 6          | NA       | 3.91308x10 <sup>-06</sup> | 4.40947x10 <sup>-11</sup>         |
| rs114015300 | 31256965              | (C/A)          | 0.1212 | 1523     | 1      | 1              | G=C,A=A            | 7          | NA       | 3.95081x10 <sup>-06</sup> | 4.40947x10 <sup>-11</sup>         |
| rs115007911 | 31256982              | (C/A)          | 0.1212 | 1540     | 1      | 1              | G=C,A=A            | 7          | NA       | 3.95163x10 <sup>-06</sup> | 4.40947x10 <sup>-11</sup>         |
| rs146303266 | 31257093              | (<br>-/TGTCTC) | 0.1212 | 1651     | 1      | 1              | G=-,A=TGTCTC       | 7          | NA       | 3.95492x10 <sup>-06</sup> | 4.40947x10 <sup>-11</sup>         |
| rs17192421  | 31256693              | (T/C)          | 0.1212 | 1251     | 1      | 1              | G=T,A=C            | 5          | NA       | 3.94602x10 <sup>-06</sup> | 4.40948x10 <sup>-11</sup>         |
| rs17198776  | 31256732              | (C/T)          | 0.1212 | 1290     | 1      | 1              | G=C,A=T            | 5          | NA       | 3.94836x10 <sup>-06</sup> | 4.40948x10 <sup>-11</sup>         |
| rs56184612  | 31255523              | (A/G)          | 0.1212 | 81       | 1      | 1              | G=A,A=G            | 5          | NA       | 3.90389x10 <sup>-06</sup> | 4.41026x10 <sup>-11</sup>         |
| rs56016471  | 31255555              | (A/C)          | 0.1212 | 113      | 1      | 1              | G=A,A=C            | 5          | NA       | 3.90504x10 <sup>-06</sup> | 4.41026x10 <sup>-11</sup>         |
| rs55825863  | 31255465              | (C/A)          | 0.1212 | 23       | 1      | 1              | G=C,A=A            | 7          | NA       | 3.9016x10 <sup>-06</sup>  | 4.41027x10 <sup>-11</sup>         |
| rs17192393  | 31256065              | (C/G)          | 0.1212 | 623      | 1      | 1              | G=C,A=G            | 5          | NA       | 3.92231x10 <sup>-06</sup> | 4.41029x10 <sup>-11</sup>         |
| rs57742463  | 31255210              | (C/A)          | 0.1212 | -232     | 1      | 1              | G=C,A=A            | 5          | NA       | 3.89245x10 <sup>-06</sup> | 5.26505x10 <sup>-11</sup>         |
| rs57599285  | 31255183              | (C/T)          | 0.1212 | -259     | 1      | 1              | G=C,A=T            | 5          | NA       | 3.89018x10 <sup>-06</sup> | 5.2683x10 <sup>-11</sup>          |
| rs199720990 | 31254972              | (A/C)          | 0.1212 | -470     | 1      | 1              | G=A,A=C            | 5          | NA       | 3.88336x10 <sup>-06</sup> | 5.284x10 <sup>-11</sup>           |
| rs55822325  | 31254691              | (A/G)          | 0.1212 | -751     | 1      | 1              | G=A,A=G            | 5          | NA       | 3.87316x10 <sup>-06</sup> | 5.3097x10 <sup>-11</sup>          |
| rs56328367  | 31254594              | (T/C)          | 0.1212 | -848     | 1      | 1              | G=T,A=C            | 7          | NA       | 3.87203x10 <sup>-06</sup> | 5.32345x10 <sup>-11</sup>         |
| rs58860177  | 31254485              | (T/C)          | 0.1212 | -957     | 1      | 1              | G=T,A=C            | 7          | NA       | 3.8664x10 <sup>-06</sup>  | 5.33195x10 <sup>-11</sup>         |
| rs58022700  | 31254334              | (C/T)          | 0.1212 | -1108    | 1      | 1              | G=C,A=T            | 5          | NA       | 3.86303x10 <sup>-06</sup> | 5.3448x10 <sup>-11</sup>          |
| rs58410461  | 31254299              | (A/C)          | 0.1212 | -1143    | 1      | 1              | G=A,A=C            | 5          | NA       | 3.86191x10 <sup>-06</sup> | 5.34815x10 <sup>-11</sup>         |
| rs59217589  | 31254280              | (T/A)          | 0.1212 | -1162    | 1      | 1              | G=T,A=A            | 5          | NA       | 3.85852x10 <sup>-06</sup> | 5.35205x10 <sup>-11</sup>         |
| rs114798972 | 31253514              | (C/T)          | 0.1212 | -1928    | 1      | 1              | G=C,A=T            | 3a         | NA       | 3.83177x10 <sup>-06</sup> | 5.42715x10 <sup>-11</sup>         |
| rs114206206 | 31253468              | (G/T)          | 0.1212 | -1974    | 1      | 1              | G=G,A=T            | 2c         | NA       | 3.82846x10 <sup>-06</sup> | 5.43405x10 <sup>-11</sup>         |
| rs115699806 | 31252031              | (A/G)          | 0.1212 | -3411    | 1      | 1              | G=A,A=G            | 5          | NA       | 3.77713x10 <sup>-06</sup> | 5.43885x10 <sup>-11</sup>         |

| SNP Id      | Position <sup>s</sup> | Alleles | MAF    | Distance | Dprime | R <sup>2</sup> | Correlated Alleles | RegulomeDB | Function | GWAS <i>P</i>             | Replication <i>P</i> <sup>#</sup> |
|-------------|-----------------------|---------|--------|----------|--------|----------------|--------------------|------------|----------|---------------------------|-----------------------------------|
| rs115805679 | 31264288              | (T/C)   | 0.1212 | 8846     | 1      | 1              | G=T,A=C            | 7          | NA       | 3.89999x10 <sup>-06</sup> | 5.4538x10 <sup>-11</sup>          |
| rs115727572 | 31253034              | (T/G)   | 0.1212 | -2408    | 1      | 1              | G=T,A=G            | 7          | NA       | 3.80865x10 <sup>-06</sup> | 5.48845x10 <sup>-11</sup>         |
| rs116350468 | 31252951              | (G/T)   | 0.1212 | -2491    | 1      | 1              | G=G,A=T            | 7          | NA       | 3.80534x10 <sup>-06</sup> | 5.5031x10 <sup>-11</sup>          |
| rs116281893 | 31252527              | (T/C)   | 0.1212 | -2915    | 1      | 1              | G=T,A=C            | 6          | NA       | 3.79012x10 <sup>-06</sup> | 5.5382x10 <sup>-11</sup>          |
| rs115931507 | 31252406              | (T/C)   | 0.1212 | -3036    | 1      | 1              | G=T,A=C            | 6          | NA       | 3.78687x10 <sup>-06</sup> | 5.54655x10 <sup>-11</sup>         |
| rs114020623 | 31251962              | (C/T)   | 0.1212 | -3480    | 1      | 1              | G=C,A=T            | 5          | NA       | 3.77605x10 <sup>-06</sup> | 5.58695x10 <sup>-11</sup>         |
| rs115182712 | 31251954              | (A/G)   | 0.1212 | -3488    | 1      | 1              | G=A,A=G            | 5          | NA       | 3.77605x10 <sup>-06</sup> | 5.58695x10 <sup>-11</sup>         |
| rs115228090 | 31264284              | (C/T)   | 0.1212 | 8842     | 1      | 1              | G=C,A=T            | 7          | NA       | 3.89798x10 <sup>-06</sup> | 5.62565x10 <sup>-11</sup>         |
| rs114612857 | 31250876              | (C/G)   | 0.1212 | -4566    | 1      | 1              | G=C,A=G            | 6          | NA       | 3.74927x10 <sup>-06</sup> | 5.6673x10 <sup>-11</sup>          |
| rs17198909  | 31266189              | (A/T)   | 0.1162 | 10747    | 1      | 0.9529         | G=A,A=T            | 6          | NA       | 5.45889x10 <sup>-06</sup> | 5.70035x10 <sup>-11</sup>         |
| rs12662096  | 31242445              | (T/C)   | 0.1212 | -12997   | 1      | 1              | G=T,A=C            | 5          | NA       | 3.52123x10 <sup>-06</sup> | 8.505x10 <sup>-11</sup>           |
| rs17192498  | 31265887              | (A/G)   | 0.1364 | 10445    | 1      | 0.8736         | G=A,A=G            | 5          | NA       | 6.55644x10 <sup>-06</sup> | 1.37604x10 <sup>-10</sup>         |
| rs3915970   | 31269460              | (T/C)   | 0.1212 | 14018    | 1      | 1              | G=T,A=C            | 6          | NA       | 5.15058x10 <sup>-06</sup> | 2.82343x10 <sup>-10</sup>         |
| rs17192533  | 31266085              | (C/G)   | 0.1212 | 10643    | 1      | 1              | G=C,A=G            | 5          | NA       | 5.13922x10 <sup>-06</sup> | 2.87749x10 <sup>-10</sup>         |
| rs17198664  | 31248382              | (C/T)   | 0.1212 | -7060    | 1      | 1              | G=C,A=T            | 7          | NA       | 4.33799x10 <sup>-06</sup> | 4.00321x10 <sup>-10</sup>         |
| rs17192281  | 31248075              | (G/A)   | 0.1212 | -7367    | 1      | 1              | G=G,A=A            | 7          | NA       | 4.26831x10 <sup>-06</sup> | 4.16853x10 <sup>-10</sup>         |
| rs4713440   | 31150323              | (C/A)   | 0.1313 | -105119  | 0.952  | 0.827          | G=C,A=A            | 6          | NA       | 9.39967x10 <sup>-06</sup> | 4.67131x10 <sup>-10</sup>         |
| rs9468884   | 31151319              | (T/C)   | 0.1313 | -104123  | 0.952  | 0.827          | G=T,A=C            | 6          | NA       | 9.45919x10 <sup>-06</sup> | 4.68199x10 <sup>-10</sup>         |
| rs56178408  | 31150039              | (C/T)   | 0.1313 | -105403  | 0.952  | 0.827          | G=C,A=T            | 7          | NA       | 9.42962x10 <sup>-06</sup> | 4.71539x10 <sup>-10</sup>         |
| rs9468886   | 31151573              | (G/A)   | 0.1313 | -103869  | 0.952  | 0.827          | G=G,A=A            | 7          | NA       | 9.45767x10 <sup>-06</sup> | 4.75245x10 <sup>-10</sup>         |
| rs56332747  | 31152321              | (G/A)   | 0.1313 | -103121  | 0.952  | 0.827          | G=G,A=A            | 7          | NA       | 9.47286x10 <sup>-06</sup> | 4.75571x10 <sup>-10</sup>         |
| rs9501351   | 31153126              | (C/T)   | 0.1313 | -102316  | 0.952  | 0.827          | G=C,A=T            | 6          | NA       | 9.49217x10 <sup>-06</sup> | 4.75975x10 <sup>-10</sup>         |
| rs6913631   | 31152098              | (A/C)   | 0.1313 | -103344  | 0.952  | 0.827          | G=A,A=C            | 6          | NA       | 9.47041x10 <sup>-06</sup> | 4.76474x10 <sup>-10</sup>         |
| rs9501506   | 31153573              | (T/C)   | 0.1313 | -101869  | 0.952  | 0.827          | G=T,A=C            | 4          | NA       | 9.49869x10 <sup>-06</sup> | 4.76662x10 <sup>-10</sup>         |
| rs9501507   | 31153716              | (T/C)   | 0.1313 | -101726  | 0.952  | 0.827          | G=T,A=C            | 4          | NA       | 9.49891x10 <sup>-06</sup> | 4.7744x10 <sup>-10</sup>          |
| rs73728779  | 31253605              | (T/C)   | 0.1212 | -1837    | 1      | 1              | G=T,A=C            | 3a         | NA       | 7.24496x10 <sup>-06</sup> | 5.7844x10 <sup>-10</sup>          |
| rs17191040  | 31154206              | (T/G)   | 0.1313 | -101236  | 0.952  | 0.827          | G=T,A=G            | 2c         | NA       | 9.5077x10 <sup>-06</sup>  | 7.067x10 <sup>-10</sup>           |
| rs115737821 | 31154138              | (C/G)   | 0.1313 | -101304  | 0.952  | 0.827          | G=C,A=G            | 4          | NA       | 9.5077x10 <sup>-06</sup>  | 7.067x10 <sup>-10</sup>           |
| rs199987285 | 31154473              | (-/TTG) | 0.1313 | -100969  | 0.952  | 0.827          | G=-,A=TTG          | 3a         | NA       | 9.51424x10 <sup>-06</sup> | 7.0731x10 <sup>-10</sup>          |

| SNP Id      | Position <sup>s</sup> | Alleles | MAF    | Distance | Dprime | R <sup>2</sup> | Correlated Alleles | RegulomeDB | Function | GWAS P                    | Replication P <sup>#</sup> |
|-------------|-----------------------|---------|--------|----------|--------|----------------|--------------------|------------|----------|---------------------------|----------------------------|
| rs17197402  | 31154384              | (G/A)   | 0.1313 | -101058  | 0.952  | 0.827          | G=G,A=A            | 2b         | NA       | 9.51401x10 <sup>-06</sup> | 7.07455x10 <sup>-10</sup>  |
| rs114240643 | 31108628              | (A/G)   | 0.1162 | -146814  | 1      | 0.9529         | G=A,A=G            | 5          | NA       | 9.02682x10 <sup>-06</sup> | 8.44205x10 <sup>-10</sup>  |
| rs73728781  | 31253619              | (C/T)   | 0.1212 | -1823    | 1      | 1              | G=C,A=T            | 4          | NA       | 5.19599x10 <sup>-06</sup> | 1.2662x10 <sup>-09</sup>   |
| rs9500884   | 31165733              | (C/T)   | 0.1111 | -89709   | 1      | 0.9063         | G=C,A=T            | 4          | NA       | 9.4223x10 <sup>-06</sup>  | 1.92309x10 <sup>-09</sup>  |
| rs140174668 | 31168842              | (C/T)   | 0.1162 | -86600   | 1      | 0.9529         | G=C,A=T            | 6          | NA       | 1.95821x10 <sup>-05</sup> | 9.1384x10 <sup>-10</sup>   |
| rs17197422  | 31154447              | (A/G)   | 0.1162 | -100995  | 1      | 0.9529         | G=A,A=G            | 4          | NA       | 1.98368x10 <sup>-05</sup> | 1.06455x10 <sup>-09</sup>  |
| rs9468881   | 31150870              | (C/T)   | 0.1162 | -104572  | 1      | 0.9529         | G=C,A=T            | 7          | NA       | 1.97369x10 <sup>-05</sup> | 1.09292x10 <sup>-09</sup>  |
| rs1841      | 31130760              | (A/G)   | 0.1162 | -124682  | 1      | 0.9529         | G=A,A=G            | 3a         | NA       | 1.64469x10 <sup>-05</sup> | 9.3271x10 <sup>-10</sup>   |
| rs12529697  | 31125407              | (G/A)   | 0.1162 | -130035  | 1      | 0.9529         | G=G,A=A            | 5          | NA       | 1.17501x10 <sup>-05</sup> | 9.2295x10 <sup>-10</sup>   |
| rs56205037  | 31120768              | (C/T)   | 0.1162 | -134674  | 1      | 0.9529         | G=C,A=T            | 5          | NA       | 1.10119x10 <sup>-05</sup> | 1.49721x10 <sup>-09</sup>  |
| rs55898325  | 31120711              | (C/A)   | 0.1162 | -134731  | 1      | 0.9529         | G=C,A=A            | 5          | NA       | 1.12561x10 <sup>-05</sup> | 8.67625x10 <sup>-10</sup>  |
| rs2027937   | 31116502              | (C/T)   | 0.1162 | -138940  | 1      | 0.9529         | G=C,A=T            | 5          | missense | 1.00786x10 <sup>-05</sup> | 8.37735x10 <sup>-10</sup>  |
| rs115320563 | 31188708              | (C/T)   | 0.1111 | -66734   | 1      | 0.9063         | G=C,A=T            | 7          | NA       | 2.34301x10 <sup>-05</sup> | 1.34761x10 <sup>-09</sup>  |
| rs9461662   | 31187103              | (C/G)   | 0.1111 | -68339   | 1      | 0.9063         | G=C,A=G            | 5          | NA       | 1.53515x10 <sup>-05</sup> | 1.01152x10 <sup>-09</sup>  |
| rs9501088   | 31185059              | (T/G)   | 0.1111 | -70383   | 1      | 0.9063         | G=T,A=G            | 6          | NA       | 1.43995x10 <sup>-05</sup> | 1.00998x10 <sup>-09</sup>  |
| rs9501084   | 31184900              | (G/T)   | 0.1111 | -70542   | 1      | 0.9063         | G=G,A=T            | 7          | NA       | 1.43727x10 <sup>-05</sup> | 1.01193x10 <sup>-09</sup>  |
| rs9501522   | 31184425              | (G/A)   | 0.1111 | -71017   | 1      | 0.9063         | G=G,A=A            | 4          | NA       | 1.52153x10 <sup>-05</sup> | 1.01241x10 <sup>-09</sup>  |
| rs80086978  | 31180470              | (T/C)   | 0.1111 | -74972   | 1      | 0.9063         | G=T,A=C            | 6          | NA       | 1.42257x10 <sup>-05</sup> | 1.01323x10 <sup>-09</sup>  |
| rs9461659   | 31175392              | (G/A)   | 0.1111 | -80050   | 1      | 0.9063         | G=G,A=A            | 7          | NA       | 1.28639x10 <sup>-05</sup> | 1.01289x10 <sup>-09</sup>  |
| rs28857280  | 31174810              | (A/G)   | 0.1111 | -80632   | 1      | 0.9063         | G=A,A=G            | 5          | NA       | 1.28639x10 <sup>-05</sup> | 1.01243x10 <sup>-09</sup>  |
| rs28744239  | 31174758              | (G/C)   | 0.1111 | -80684   | 1      | 0.9063         | G=G,A=C            | 7          | NA       | 1.28639x10 <sup>-05</sup> | 4.22851x10 <sup>-10</sup>  |
| rs2394885   | 31174590              | (G/C)   | 0.1111 | -80852   | 1      | 0.9063         | G=G,A=C            | 6          | NA       | 1.28639x10 <sup>-05</sup> | 4.22923x10 <sup>-10</sup>  |
| rs11489178  | 31174036              | (G/A)   | 0.1111 | -81406   | 1      | 0.9063         | G=G,A=A            | 6          | NA       | 1.26653x10 <sup>-05</sup> | 5.0869x10 <sup>-10</sup>   |
| rs12660585  | 31173768              | (A/G)   | 0.1111 | -81674   | 1      | 0.9063         | G=A,A=G            | 5          | NA       | 1.28871x10 <sup>-05</sup> | 4.21949x10 <sup>-10</sup>  |
| rs9263886   | 31172879              | (A/T)   | 0.1111 | -82563   | 1      | 0.9063         | G=A,A=T            | 5          | NA       | 1.28656x10 <sup>-05</sup> | 4.22497x10 <sup>-10</sup>  |
| rs3887383   | 31172317              | (G/A)   | 0.1111 | -83125   | 1      | 0.9063         | G=G,A=A            | 6          | NA       | 1.10757x10 <sup>-05</sup> | 8.83935x10 <sup>-10</sup>  |
| rs9263881   | 31171924              | (A/G)   | 0.1111 | -83518   | 1      | 0.9063         | G=A,A=G            | 4          | NA       | 0.000012814               | 4.27566x10 <sup>-10</sup>  |
| rs73728294  | 31170227              | (A/G)   | 0.1111 | -85215   | 1      | 0.9063         | G=A,A=G            | 2b         | NA       | 1.38521x10 <sup>-05</sup> | 9.35565x10 <sup>-10</sup>  |
| rs9295961   | 31167498              | (T/C)   | 0.1111 | -87944   | 1      | 0.9063         | G=T,A=C            | 5          | NA       | 1.94713x10 <sup>-05</sup> | 1.87753x10 <sup>-09</sup>  |

| SNP Id      | Position <sup>s</sup> | Alleles | MAF    | Distance | Dprime | R <sup>2</sup> | Correlated Alleles | RegulomeDB | Function | GWAS <i>P</i>             | Replication <i>P</i> <sup>#</sup> |
|-------------|-----------------------|---------|--------|----------|--------|----------------|--------------------|------------|----------|---------------------------|-----------------------------------|
| rs886389    | 31166887              | (G/T)   | 0.1111 | -88555   | 1      | 0.9063         | G=G,A=T            | 5          | NA       | 0.000019532               | 1.8745x10 <sup>-09</sup>          |
| rs79278836  | 31166301              | (C/T)   | 0.1111 | -89141   | 1      | 0.9063         | G=C,A=T            | 2b         | NA       | 1.95808x10 <sup>-05</sup> | 1.86502x10 <sup>-09</sup>         |
| rs78429324  | 31166239              | (C/T)   | 0.1111 | -89203   | 1      | 0.9063         | G=C,A=T            | 4          | NA       | 0.000019589               | 1.85775x10 <sup>-09</sup>         |
| rs78517503  | 31164906              | (G/A)   | 0.1111 | -90536   | 1      | 0.9063         | G=G,A=A            | 4          | NA       | 1.96998x10 <sup>-05</sup> | 1.84636x10 <sup>-09</sup>         |
| rs9501071   | 31164471              | (C/G)   | 0.1111 | -90971   | 1      | 0.9063         | G=C,A=G            | 5          | NA       | 0.000019737               | 1.8586x10 <sup>-09</sup>          |
| rs9501070   | 31164224              | (C/G)   | 0.1111 | -91218   | 1      | 0.9063         | G=C,A=G            | 3a         | NA       | 1.97577x10 <sup>-05</sup> | 1.85532x10 <sup>-09</sup>         |
| rs9461657   | 31162648              | (C/A)   | 0.1111 | -92794   | 1      | 0.9063         | G=C,A=A            | 5          | NA       | 1.98535x10 <sup>-05</sup> | 1.84613x10 <sup>-09</sup>         |
| rs9468890   | 31161893              | (T/A)   | 0.1111 | -93549   | 1      | 0.9063         | G=T,A=A            | 5          | NA       | 1.98452x10 <sup>-05</sup> | 2.2017x10 <sup>-09</sup>          |
| rs55938644  | 31161856              | (T/C)   | 0.1111 | -93586   | 1      | 0.9063         | G=T,A=C            | 7          | NA       | 0.000019841               | 2.14865x10 <sup>-09</sup>         |
| rs60851386  | 31161404              | (C/T)   | 0.1111 | -94038   | 1      | 0.9063         | G=C,A=T            | 5          | NA       | 0.000019841               | 2.20605x10 <sup>-09</sup>         |
| rs115923462 | 31161000              | (G/A)   | 0.1111 | -94442   | 1      | 0.9063         | G=G,A=A            | 5          | NA       | 1.99045x10 <sup>-05</sup> | 9.42925x10 <sup>-10</sup>         |
| rs9461653   | 31160553              | (A/G)   | 0.1111 | -94889   | 1      | 0.9063         | G=A,A=G            | 4          | NA       | 1.98326x10 <sup>-05</sup> | 2.20663x10 <sup>-09</sup>         |
| rs12529498  | 31160211              | (A/G)   | 0.1111 | -95231   | 1      | 0.9063         | G=A,A=G            | 5          | NA       | 1.98284x10 <sup>-05</sup> | 2.18687x10 <sup>-09</sup>         |
| rs28617578  | 31159522              | (C/T)   | 0.1111 | -95920   | 1      | 0.9063         | G=C,A=T            | 6          | NA       | 1.98159x10 <sup>-05</sup> | 2.18939x10 <sup>-09</sup>         |
| rs9295959   | 31159041              | (G/A)   | 0.1111 | -96401   | 1      | 0.9063         | G=G,A=A            | .          | NA       | 0.000018979               | 1.92053x10 <sup>-09</sup>         |
| .           | 31158884              | (C/T)   | 0.1111 | -96558   | 1      | 0.9063         | G=C,A=T            | 7          | .        | 2.02316x10 <sup>-05</sup> | 2.14649x10 <sup>-09</sup>         |
| rs368529702 | 31158882              | (C/-)   | 0.1111 | -96560   | 1      | 0.9063         | G=C,A=-            | .          | NA       | 2.02316x10 <sup>-05</sup> | 2.14649x10 <sup>-09</sup>         |
| rs12527342  | 31158505              | (T/C)   | 0.1111 | -96937   | 1      | 0.9063         | G=T,A=C            | 4          | NA       | 1.98117x10 <sup>-05</sup> | 2.20498x10 <sup>-09</sup>         |
| rs60107636  | 31156698              | (C/T)   | 0.1111 | -98744   | 1      | 0.9063         | G=C,A=T            | 7          | NA       | 2.43001x10 <sup>-05</sup> | 2.89518x10 <sup>-09</sup>         |
| rs9468889   | 31155385              | (T/G)   | 0.1111 | -100057  | 1      | 0.9063         | G=T,A=G            | 7          | NA       | 1.97701x10 <sup>-05</sup> | 2.19893x10 <sup>-09</sup>         |
| rs9461652   | 31155187              | (G/A)   | 0.1111 | -100255  | 1      | 0.9063         | G=G,A=A            | 5          | NA       | 1.97576x10 <sup>-05</sup> | 2.18631x10 <sup>-09</sup>         |
| rs3208498   | 31154421              | (C/T)   | 0.1111 | -101021  | 1      | 0.9063         | G=C,A=T            | 2b         | NA       | 1.97369x10 <sup>-05</sup> | 2.20071x10 <sup>-09</sup>         |
| rs17197395  | 31154171              | (A/G)   | 0.1111 | -101271  | 1      | 0.9063         | G=A,A=G            | 4          | NA       | 1.97369x10 <sup>-05</sup> | 2.20019x10 <sup>-09</sup>         |
| rs17197375  | 31154040              | (C/T)   | 0.1111 | -101402  | 1      | 0.9063         | G=C,A=T            | 2b         | NA       | 1.97369x10 <sup>-05</sup> | 2.25288x10 <sup>-09</sup>         |
| rs11970124  | 31153916              | (G/A)   | 0.1111 | -101526  | 1      | 0.9063         | G=G,A=A            | 2b         | NA       | 1.96579x10 <sup>-05</sup> | 2.22493x10 <sup>-09</sup>         |
| rs375415483 | 31152886              | (T/-)   | 0.1111 | -102556  | 1      | 0.9063         | G=T,A=-            | .          | NA       | 1.97039x10 <sup>-05</sup> | 2.13455x10 <sup>-09</sup>         |
| rs9501350   | 31152839              | (C/T)   | 0.1111 | -102603  | 1      | 0.9063         | G=C,A=T            | 6          | NA       | 1.97039x10 <sup>-05</sup> | 2.24887x10 <sup>-09</sup>         |
| rs9501505   | 31152734              | (A/G)   | 0.1111 | -102708  | 1      | 0.9063         | G=A,A=G            | 7          | NA       | 1.97039x10 <sup>-05</sup> | 2.25473x10 <sup>-09</sup>         |
| rs9468887   | 31151690              | (C/G)   | 0.1111 | -103752  | 1      | 0.9063         | G=C,A=G            | 7          | NA       | 1.96709x10 <sup>-05</sup> | 2.2496x10 <sup>-09</sup>          |

| SNP Id      | Position <sup>\$</sup> | Alleles | MAF    | Distance | Dprime | R <sup>2</sup> | Correlated Alleles | RegulomeDB | Function | GWAS <i>P</i>             | Replication <i>P</i> <sup>#</sup> |
|-------------|------------------------|---------|--------|----------|--------|----------------|--------------------|------------|----------|---------------------------|-----------------------------------|
| rs9468880   | 31150858               | (G/A)   | 0.1111 | -104584  | 1      | 0.9063         | G=G,A=A            | 7          | NA       | 1.96504x10 <sup>-05</sup> | 2.26377x10 <sup>-09</sup>         |
| rs4711258   | 31150383               | (G/A)   | 0.1111 | -105059  | 1      | 0.9063         | G=G,A=A            | 7          | NA       | 1.96381x10 <sup>-05</sup> | 2.25141x10 <sup>-09</sup>         |
| rs9501072   | 31164495               | (G/A)   | 0.1162 | -90947   | 0.9505 | 0.8609         | G=G,A=A            | 5          | NA       | 0.000017296               | 1.58476x10 <sup>-09</sup>         |
| .           | 31154981               | (A/G)   | 0.1061 | -100461  | 1      | 0.8602         | G=A,A=G            | .          | .        | 2.10874x10 <sup>-05</sup> | 9.71975x10 <sup>-09</sup>         |
| rs17191139  | 31170821               | (A/T)   | 0.1212 | -84621   | 0.9052 | 0.8193         | G=A,A=T            | 2b         | NA       | 1.78211x10 <sup>-05</sup> | 1.1162x10 <sup>-09</sup>          |
| rs35006917  | 31149015               | (-/A)   | 0.1212 | -106427  | 0.9052 | 0.8193         | G=-,A=A            | 6          | NA       | 1.78244x10 <sup>-05</sup> | 2.84835x10 <sup>-08</sup>         |
| rs11752301  | 31147619               | (T/C)   | 0.1212 | -107823  | 0.9052 | 0.8193         | G=T,A=C            | 6          | NA       | 1.82187x10 <sup>-05</sup> | 3.01398x10 <sup>-08</sup>         |
| rs1052986   | 31146439               | (G/C)   | 0.1212 | -109003  | 0.9052 | 0.8193         | G=G,A=C            | 4          | NA       | 1.81883x10 <sup>-05</sup> | 3.02105x10 <sup>-08</sup>         |
| rs192460891 | 31145000               | (T/G)   | 0.1212 | -110442  | 0.9052 | 0.8193         | G=T,A=G            | 6          | NA       | 0.000018208               | 3.07681x10 <sup>-08</sup>         |
| rs375363217 | 31144887               | (A/G)   | 0.1212 | -110555  | 0.9052 | 0.8193         | G=A,A=G            | 6          | NA       | 0.000018208               | 3.09334x10 <sup>-08</sup>         |
| rs3734872   | 31143804               | (T/G)   | 0.1212 | -111638  | 0.9052 | 0.8193         | G=T,A=G            | 2b         | NA       | 0.000018208               | 3.1296x10 <sup>-08</sup>          |
| rs9468879   | 31143249               | (C/A)   | 0.1212 | -112193  | 0.9052 | 0.8193         | G=C,A=A            | 5          | NA       | 1.81162x10 <sup>-05</sup> | 3.04347x10 <sup>-08</sup>         |
| rs9461649   | 31143158               | (C/T)   | 0.1212 | -112284  | 0.9052 | 0.8193         | G=C,A=T            | 5          | NA       | 1.81126x10 <sup>-05</sup> | 3.03536x10 <sup>-08</sup>         |
| rs9468877   | 31142903               | (G/A)   | 0.1212 | -112539  | 0.9052 | 0.8193         | G=G,A=A            | 4          | NA       | 0.000018109               | 3.0537x10 <sup>-08</sup>          |
| rs9461648   | 31142719               | (T/C)   | 0.1212 | -112723  | 0.9052 | 0.8193         | G=T,A=C            | 3a         | NA       | 1.82153x10 <sup>-05</sup> | 3.03818x10 <sup>-08</sup>         |
| rs2394969   | 31303131               | (T/C)   | 0.1465 | 47689    | 1      | 0.8038         | G=C,A=T            | 6          | NA       | 0.0607003                 | 2.30683x10 <sup>-11</sup>         |

<sup>\$</sup> positions are given according to the hg19 genome build

<sup>#</sup> one-tailed test

Table S9. Single-Tissue eQTL for rs3187964 in the GTEx project

| Gencode Id         | Gene Symbol     | Variant Id         | SNP Id    | P                       | NES   | Tissue                              |
|--------------------|-----------------|--------------------|-----------|-------------------------|-------|-------------------------------------|
| ENSG00000179344.12 | <i>HLA-DQB1</i> | 6_32605207_C_G_b37 | rs3187964 | 3.20x10 <sup>-124</sup> | -1.1  | Muscle - Skeletal                   |
| ENSG00000179344.12 | <i>HLA-DQB1</i> | 6_32605207_C_G_b37 | rs3187964 | 2.90x10 <sup>-122</sup> | -1.1  | Skin - Sun Exposed (Lower leg)      |
| ENSG00000179344.12 | <i>HLA-DQB1</i> | 6_32605207_C_G_b37 | rs3187964 | 3.60x10 <sup>-96</sup>  | -1    | Skin - Not Sun Exposed (Suprapubic) |
| ENSG00000179344.12 | <i>HLA-DQB1</i> | 6_32605207_C_G_b37 | rs3187964 | 3.10x10 <sup>-91</sup>  | -1    | Adipose - Subcutaneous              |
| ENSG00000179344.12 | <i>HLA-DQB1</i> | 6_32605207_C_G_b37 | rs3187964 | 9.80x10 <sup>-91</sup>  | -0.8  | Whole Blood                         |
| ENSG00000179344.12 | <i>HLA-DQB1</i> | 6_32605207_C_G_b37 | rs3187964 | 7.20x10 <sup>-89</sup>  | -0.98 | Thyroid                             |
| ENSG00000179344.12 | <i>HLA-DQB1</i> | 6_32605207_C_G_b37 | rs3187964 | 6.60x10 <sup>-88</sup>  | -0.99 | Nerve - Tibial                      |
| ENSG00000232629.4  | <i>HLA-DQB2</i> | 6_32605207_C_G_b37 | rs3187964 | 1.60x10 <sup>-85</sup>  | 1.1   | Nerve - Tibial                      |
| ENSG00000232629.4  | <i>HLA-DQB2</i> | 6_32605207_C_G_b37 | rs3187964 | 3.60x10 <sup>-82</sup>  | 0.96  | Whole Blood                         |
| ENSG00000179344.12 | <i>HLA-DQB1</i> | 6_32605207_C_G_b37 | rs3187964 | 6.20x10 <sup>-81</sup>  | -0.97 | Esophagus - Mucosa                  |
| ENSG00000179344.12 | <i>HLA-DQB1</i> | 6_32605207_C_G_b37 | rs3187964 | 1.10x10 <sup>-78</sup>  | -0.84 | Artery - Tibial                     |
| ENSG00000232629.4  | <i>HLA-DQB2</i> | 6_32605207_C_G_b37 | rs3187964 | 2.30x10 <sup>-78</sup>  | 0.91  | Artery - Tibial                     |
| ENSG00000232629.4  | <i>HLA-DQB2</i> | 6_32605207_C_G_b37 | rs3187964 | 2.40x10 <sup>-78</sup>  | 0.98  | Lung                                |
| ENSG00000232629.4  | <i>HLA-DQB2</i> | 6_32605207_C_G_b37 | rs3187964 | 2.40x10 <sup>-78</sup>  | 0.97  | Thyroid                             |
| ENSG00000179344.12 | <i>HLA-DQB1</i> | 6_32605207_C_G_b37 | rs3187964 | 2.50x10 <sup>-77</sup>  | -1    | Esophagus - Muscularis              |
| ENSG00000232629.4  | <i>HLA-DQB2</i> | 6_32605207_C_G_b37 | rs3187964 | 4.30x10 <sup>-77</sup>  | 0.97  | Muscle - Skeletal                   |
| ENSG00000232629.4  | <i>HLA-DQB2</i> | 6_32605207_C_G_b37 | rs3187964 | 1.70x10 <sup>-76</sup>  | 1.1   | Adipose - Subcutaneous              |
| ENSG00000179344.12 | <i>HLA-DQB1</i> | 6_32605207_C_G_b37 | rs3187964 | 1.00x10 <sup>-71</sup>  | -0.97 | Breast - Mammary Tissue             |
| ENSG00000179344.12 | <i>HLA-DQB1</i> | 6_32605207_C_G_b37 | rs3187964 | 4.60x10 <sup>-71</sup>  | -0.87 | Lung                                |
| ENSG00000179344.12 | <i>HLA-DQB1</i> | 6_32605207_C_G_b37 | rs3187964 | 5.40x10 <sup>-71</sup>  | -1    | Adipose - Visceral (Omentum)        |
| ENSG00000232629.4  | <i>HLA-DQB2</i> | 6_32605207_C_G_b37 | rs3187964 | 1.60x10 <sup>-69</sup>  | 1.1   | Esophagus - Muscularis              |
| ENSG00000179344.12 | <i>HLA-DQB1</i> | 6_32605207_C_G_b37 | rs3187964 | 9.20x10 <sup>-64</sup>  | -1.1  | Heart - Left Ventricle              |
| ENSG00000196735.7  | <i>HLA-DQA1</i> | 6_32605207_C_G_b37 | rs3187964 | 5.80x10 <sup>-62</sup>  | -0.71 | Lung                                |
| ENSG00000232629.4  | <i>HLA-DQB2</i> | 6_32605207_C_G_b37 | rs3187964 | 8.20x10 <sup>-56</sup>  | 1     | Adipose - Visceral (Omentum)        |
| ENSG00000232629.4  | <i>HLA-DQB2</i> | 6_32605207_C_G_b37 | rs3187964 | 3.90x10 <sup>-55</sup>  | 0.92  | Stomach                             |
| ENSG00000179344.12 | <i>HLA-DQB1</i> | 6_32605207_C_G_b37 | rs3187964 | 1.70x10 <sup>-54</sup>  | -1.1  | Heart - Atrial Appendage            |
| ENSG00000232629.4  | <i>HLA-DQB2</i> | 6_32605207_C_G_b37 | rs3187964 | 9.70x10 <sup>-54</sup>  | 0.97  | Artery - Aorta                      |
| ENSG00000237541.3  | <i>HLA-DQA2</i> | 6_32605207_C_G_b37 | rs3187964 | 3.10x10 <sup>-52</sup>  | 0.94  | Whole Blood                         |



| Gencode Id         | Gene Symbol     | Variant Id         | SNP Id    | P                      | NES   | Tissue                                |
|--------------------|-----------------|--------------------|-----------|------------------------|-------|---------------------------------------|
| ENSG00000179344.12 | <i>HLA-DQB1</i> | 6_32605207_C_G_b37 | rs3187964 | 1.90x10 <sup>-51</sup> | -1    | Esophagus - Gastroesophageal Junction |
| ENSG00000232629.4  | <i>HLA-DQB2</i> | 6_32605207_C_G_b37 | rs3187964 | 6.10x10 <sup>-50</sup> | 0.91  | Colon - Transverse                    |
| ENSG00000237541.3  | <i>HLA-DQA2</i> | 6_32605207_C_G_b37 | rs3187964 | 5.90x10 <sup>-49</sup> | 0.87  | Muscle - Skeletal                     |
| ENSG00000237541.3  | <i>HLA-DQA2</i> | 6_32605207_C_G_b37 | rs3187964 | 3.10x10 <sup>-48</sup> | 0.79  | Skin - Sun Exposed (Lower leg)        |
| ENSG00000237541.3  | <i>HLA-DQA2</i> | 6_32605207_C_G_b37 | rs3187964 | 9.60x10 <sup>-48</sup> | 0.93  | Thyroid                               |
| ENSG00000232629.4  | <i>HLA-DQB2</i> | 6_32605207_C_G_b37 | rs3187964 | 3.40x10 <sup>-46</sup> | 1     | Breast - Mammary Tissue               |
| ENSG00000179344.12 | <i>HLA-DQB1</i> | 6_32605207_C_G_b37 | rs3187964 | 5.80x10 <sup>-46</sup> | -1    | Colon - Sigmoid                       |
| ENSG00000237541.3  | <i>HLA-DQA2</i> | 6_32605207_C_G_b37 | rs3187964 | 2.70x10 <sup>-45</sup> | 0.99  | Adipose - Subcutaneous                |
| ENSG00000237541.3  | <i>HLA-DQA2</i> | 6_32605207_C_G_b37 | rs3187964 | 3.00x10 <sup>-45</sup> | 0.95  | Nerve - Tibial                        |
| ENSG00000232629.4  | <i>HLA-DQB2</i> | 6_32605207_C_G_b37 | rs3187964 | 1.60x10 <sup>-44</sup> | 1.1   | Spleen                                |
| ENSG00000179344.12 | <i>HLA-DQB1</i> | 6_32605207_C_G_b37 | rs3187964 | 2.20x10 <sup>-44</sup> | -0.85 | Colon - Transverse                    |
| ENSG00000232629.4  | <i>HLA-DQB2</i> | 6_32605207_C_G_b37 | rs3187964 | 1.00x10 <sup>-43</sup> | 0.97  | Pancreas                              |
| ENSG00000179344.12 | <i>HLA-DQB1</i> | 6_32605207_C_G_b37 | rs3187964 | 1.10x10 <sup>-43</sup> | -1.1  | Spleen                                |
| ENSG00000237541.3  | <i>HLA-DQA2</i> | 6_32605207_C_G_b37 | rs3187964 | 1.80x10 <sup>-43</sup> | 0.88  | Lung                                  |
| ENSG00000237541.3  | <i>HLA-DQA2</i> | 6_32605207_C_G_b37 | rs3187964 | 7.00x10 <sup>-43</sup> | 0.84  | Artery - Tibial                       |
| ENSG00000179344.12 | <i>HLA-DQB1</i> | 6_32605207_C_G_b37 | rs3187964 | 2.30x10 <sup>-42</sup> | -0.9  | Stomach                               |
| ENSG00000232629.4  | <i>HLA-DQB2</i> | 6_32605207_C_G_b37 | rs3187964 | 3.50x10 <sup>-42</sup> | 0.96  | Heart - Left Ventricle                |
| ENSG00000179344.12 | <i>HLA-DQB1</i> | 6_32605207_C_G_b37 | rs3187964 | 2.20x10 <sup>-41</sup> | -0.99 | Pancreas                              |
| ENSG00000237541.3  | <i>HLA-DQA2</i> | 6_32605207_C_G_b37 | rs3187964 | 6.30x10 <sup>-41</sup> | 0.94  | Esophagus - Muscularis                |
| ENSG00000232629.4  | <i>HLA-DQB2</i> | 6_32605207_C_G_b37 | rs3187964 | 9.90x10 <sup>-41</sup> | 1.1   | Colon - Sigmoid                       |
| ENSG00000232629.4  | <i>HLA-DQB2</i> | 6_32605207_C_G_b37 | rs3187964 | 4.00x10 <sup>-40</sup> | 1.1   | Esophagus - Gastroesophageal Junction |
| ENSG00000179344.12 | <i>HLA-DQB1</i> | 6_32605207_C_G_b37 | rs3187964 | 1.20x10 <sup>-39</sup> | -1    | Testis                                |
| ENSG00000237541.3  | <i>HLA-DQA2</i> | 6_32605207_C_G_b37 | rs3187964 | 3.80x10 <sup>-39</sup> | 0.78  | Esophagus - Mucosa                    |
| ENSG00000232629.4  | <i>HLA-DQB2</i> | 6_32605207_C_G_b37 | rs3187964 | 3.70x10 <sup>-37</sup> | 0.89  | Heart - Atrial Appendage              |
| ENSG00000196735.7  | <i>HLA-DQA1</i> | 6_32605207_C_G_b37 | rs3187964 | 3.50x10 <sup>-36</sup> | -0.36 | Whole Blood                           |
| ENSG00000179344.12 | <i>HLA-DQB1</i> | 6_32605207_C_G_b37 | rs3187964 | 2.80x10 <sup>-35</sup> | -0.73 | Artery - Aorta                        |
| ENSG00000232629.4  | <i>HLA-DQB2</i> | 6_32605207_C_G_b37 | rs3187964 | 6.90x10 <sup>-35</sup> | 1.1   | Cells - EBV-transformed lymphocytes   |
| ENSG00000237541.3  | <i>HLA-DQA2</i> | 6_32605207_C_G_b37 | rs3187964 | 2.70x10 <sup>-33</sup> | 0.95  | Adipose - Visceral (Omentum)          |
| ENSG00000232629.4  | <i>HLA-DQB2</i> | 6_32605207_C_G_b37 | rs3187964 | 2.30x10 <sup>-32</sup> | 0.99  | Testis                                |
| ENSG00000237541.3  | <i>HLA-DQA2</i> | 6_32605207_C_G_b37 | rs3187964 | 7.00x10 <sup>-32</sup> | 0.84  | Colon - Transverse                    |

| Gencode Id         | Gene Symbol         | Variant Id         | SNP Id    | P                      | NES   | Tissue                              |
|--------------------|---------------------|--------------------|-----------|------------------------|-------|-------------------------------------|
| ENSG00000196735.7  | <i>HLA-DQA1</i>     | 6_32605207_C_G_b37 | rs3187964 | 2.40x10 <sup>-31</sup> | -0.52 | Muscle - Skeletal                   |
| ENSG00000237541.3  | <i>HLA-DQA2</i>     | 6_32605207_C_G_b37 | rs3187964 | 4.40x10 <sup>-31</sup> | 0.66  | Skin - Not Sun Exposed (Suprapubic) |
| ENSG00000237541.3  | <i>HLA-DQA2</i>     | 6_32605207_C_G_b37 | rs3187964 | 7.60x10 <sup>-31</sup> | 0.88  | Artery - Aorta                      |
| ENSG00000179344.12 | <i>HLA-DQB1</i>     | 6_32605207_C_G_b37 | rs3187964 | 1.90x10 <sup>-30</sup> | -0.87 | Brain - Caudate (basal ganglia)     |
| ENSG00000237541.3  | <i>HLA-DQA2</i>     | 6_32605207_C_G_b37 | rs3187964 | 2.30x10 <sup>-30</sup> | 0.95  | Breast - Mammary Tissue             |
| ENSG00000196735.7  | <i>HLA-DQA1</i>     | 6_32605207_C_G_b37 | rs3187964 | 3.40x10 <sup>-30</sup> | -0.52 | Thyroid                             |
| ENSG00000179344.12 | <i>HLA-DQB1</i>     | 6_32605207_C_G_b37 | rs3187964 | 9.10x10 <sup>-30</sup> | -1    | Cells - EBV-transformed lymphocytes |
| ENSG00000196735.7  | <i>HLA-DQA1</i>     | 6_32605207_C_G_b37 | rs3187964 | 1.10x10 <sup>-29</sup> | -0.52 | Nerve - Tibial                      |
| ENSG00000223534.1  | <i>HLA-DQB1-AS1</i> | 6_32605207_C_G_b37 | rs3187964 | 2.10x10 <sup>-29</sup> | -0.64 | Muscle - Skeletal                   |
| ENSG00000232629.4  | <i>HLA-DQB2</i>     | 6_32605207_C_G_b37 | rs3187964 | 5.50x10 <sup>-29</sup> | 1     | Pituitary                           |
| ENSG00000196735.7  | <i>HLA-DQA1</i>     | 6_32605207_C_G_b37 | rs3187964 | 5.90x10 <sup>-29</sup> | -0.49 | Esophagus - Mucosa                  |
| ENSG00000237541.3  | <i>HLA-DQA2</i>     | 6_32605207_C_G_b37 | rs3187964 | 1.90x10 <sup>-28</sup> | 0.79  | Stomach                             |
| ENSG00000196735.7  | <i>HLA-DQA1</i>     | 6_32605207_C_G_b37 | rs3187964 | 4.00x10 <sup>-28</sup> | -0.65 | Esophagus - Muscularis              |
| ENSG00000229391.3  | <i>HLA-DRB6</i>     | 6_32605207_C_G_b37 | rs3187964 | 5.00x10 <sup>-28</sup> | 0.72  | Nerve - Tibial                      |
| ENSG00000232629.4  | <i>HLA-DQB2</i>     | 6_32605207_C_G_b37 | rs3187964 | 1.20x10 <sup>-27</sup> | 0.92  | Artery - Coronary                   |
| ENSG00000229391.3  | <i>HLA-DRB6</i>     | 6_32605207_C_G_b37 | rs3187964 | 1.20x10 <sup>-27</sup> | 0.66  | Skin - Sun Exposed (Lower leg)      |
| ENSG00000229391.3  | <i>HLA-DRB6</i>     | 6_32605207_C_G_b37 | rs3187964 | 1.50x10 <sup>-27</sup> | 0.64  | Muscle - Skeletal                   |
| ENSG00000196735.7  | <i>HLA-DQA1</i>     | 6_32605207_C_G_b37 | rs3187964 | 2.50x10 <sup>-27</sup> | -0.43 | Artery - Tibial                     |
| ENSG00000229391.3  | <i>HLA-DRB6</i>     | 6_32605207_C_G_b37 | rs3187964 | 1.50x10 <sup>-26</sup> | 0.65  | Esophagus - Mucosa                  |
| ENSG00000229391.3  | <i>HLA-DRB6</i>     | 6_32605207_C_G_b37 | rs3187964 | 1.60x10 <sup>-26</sup> | 0.77  | Esophagus - Muscularis              |
| ENSG00000179344.12 | <i>HLA-DQB1</i>     | 6_32605207_C_G_b37 | rs3187964 | 4.90x10 <sup>-26</sup> | -0.94 | Prostate                            |
| ENSG00000179344.12 | <i>HLA-DQB1</i>     | 6_32605207_C_G_b37 | rs3187964 | 1.70x10 <sup>-25</sup> | -0.79 | Artery - Coronary                   |
| ENSG00000237541.3  | <i>HLA-DQA2</i>     | 6_32605207_C_G_b37 | rs3187964 | 2.20x10 <sup>-25</sup> | 1     | Cells - EBV-transformed lymphocytes |
| ENSG00000179344.12 | <i>HLA-DQB1</i>     | 6_32605207_C_G_b37 | rs3187964 | 2.90x10 <sup>-25</sup> | -0.87 | Brain - Cerebellum                  |
| ENSG00000232629.4  | <i>HLA-DQB2</i>     | 6_32605207_C_G_b37 | rs3187964 | 7.10x10 <sup>-25</sup> | 1     | Adrenal Gland                       |
| ENSG00000179344.12 | <i>HLA-DQB1</i>     | 6_32605207_C_G_b37 | rs3187964 | 1.60x10 <sup>-24</sup> | -0.94 | Brain - Putamen (basal ganglia)     |
| ENSG00000179344.12 | <i>HLA-DQB1</i>     | 6_32605207_C_G_b37 | rs3187964 | 3.60x10 <sup>-24</sup> | -0.85 | Liver                               |
| ENSG00000232629.4  | <i>HLA-DQB2</i>     | 6_32605207_C_G_b37 | rs3187964 | 6.50x10 <sup>-24</sup> | 0.78  | Small Intestine - Terminal Ileum    |
| ENSG00000179344.12 | <i>HLA-DQB1</i>     | 6_32605207_C_G_b37 | rs3187964 | 6.50x10 <sup>-24</sup> | -0.92 | Pituitary                           |
| ENSG00000229391.3  | <i>HLA-DRB6</i>     | 6_32605207_C_G_b37 | rs3187964 | 8.90x10 <sup>-24</sup> | 0.63  | Lung                                |

| Gencode Id         | Gene Symbol         | Variant Id         | SNP Id    | P                      | NES   | Tissue                                    |
|--------------------|---------------------|--------------------|-----------|------------------------|-------|-------------------------------------------|
| ENSG00000196735.7  | <i>HLA-DQA1</i>     | 6_32605207_C_G_b37 | rs3187964 | 3.00x10 <sup>-23</sup> | -0.5  | Skin - Sun Exposed (Lower leg)            |
| ENSG00000179344.12 | <i>HLA-DQB1</i>     | 6_32605207_C_G_b37 | rs3187964 | 3.10x10 <sup>-23</sup> | -1    | Vagina                                    |
| ENSG00000237541.3  | <i>HLA-DQA2</i>     | 6_32605207_C_G_b37 | rs3187964 | 3.80x10 <sup>-23</sup> | 0.92  | Esophagus - Gastroesophageal Junction     |
| ENSG00000237541.3  | <i>HLA-DQA2</i>     | 6_32605207_C_G_b37 | rs3187964 | 3.90x10 <sup>-23</sup> | 0.92  | Colon - Sigmoid                           |
| ENSG00000179344.12 | <i>HLA-DQB1</i>     | 6_32605207_C_G_b37 | rs3187964 | 6.70x10 <sup>-23</sup> | -0.84 | Brain - Hippocampus                       |
| ENSG00000229391.3  | <i>HLA-DRB6</i>     | 6_32605207_C_G_b37 | rs3187964 | 7.10x10 <sup>-23</sup> | 0.62  | Stomach                                   |
| ENSG00000179344.12 | <i>HLA-DQB1</i>     | 6_32605207_C_G_b37 | rs3187964 | 2.10x10 <sup>-22</sup> | -1    | Brain - Cerebellar Hemisphere             |
| ENSG00000229391.3  | <i>HLA-DRB6</i>     | 6_32605207_C_G_b37 | rs3187964 | 2.30x10 <sup>-22</sup> | 0.71  | Adipose - Subcutaneous                    |
| ENSG00000232629.4  | <i>HLA-DQB2</i>     | 6_32605207_C_G_b37 | rs3187964 | 2.40x10 <sup>-22</sup> | 0.83  | Brain - Caudate (basal ganglia)           |
| ENSG00000179344.12 | <i>HLA-DQB1</i>     | 6_32605207_C_G_b37 | rs3187964 | 3.10x10 <sup>-22</sup> | -1    | Uterus                                    |
| ENSG00000179344.12 | <i>HLA-DQB1</i>     | 6_32605207_C_G_b37 | rs3187964 | 4.20x10 <sup>-22</sup> | -0.81 | Small Intestine - Terminal Ileum          |
| ENSG00000229391.3  | <i>HLA-DRB6</i>     | 6_32605207_C_G_b37 | rs3187964 | 4.40x10 <sup>-22</sup> | 0.63  | Thyroid                                   |
| ENSG00000223534.1  | <i>HLA-DQB1-AS1</i> | 6_32605207_C_G_b37 | rs3187964 | 5.80x10 <sup>-22</sup> | -0.53 | Adipose - Visceral (Omentum)              |
| ENSG00000196735.7  | <i>HLA-DQA1</i>     | 6_32605207_C_G_b37 | rs3187964 | 9.60x10 <sup>-22</sup> | -0.66 | Heart - Atrial Appendage                  |
| ENSG00000237541.3  | <i>HLA-DQA2</i>     | 6_32605207_C_G_b37 | rs3187964 | 2.00x10 <sup>-21</sup> | 0.79  | Heart - Left Ventricle                    |
| ENSG00000196735.7  | <i>HLA-DQA1</i>     | 6_32605207_C_G_b37 | rs3187964 | 2.70x10 <sup>-21</sup> | -0.55 | Adipose - Visceral (Omentum)              |
| ENSG00000223534.1  | <i>HLA-DQB1-AS1</i> | 6_32605207_C_G_b37 | rs3187964 | 3.20x10 <sup>-21</sup> | -0.48 | Skin - Sun Exposed (Lower leg)            |
| ENSG00000196735.7  | <i>HLA-DQA1</i>     | 6_32605207_C_G_b37 | rs3187964 | 3.40x10 <sup>-21</sup> | -0.74 | Esophagus - Gastroesophageal Junction     |
| ENSG00000237541.3  | <i>HLA-DQA2</i>     | 6_32605207_C_G_b37 | rs3187964 | 3.50x10 <sup>-21</sup> | 0.76  | Pancreas                                  |
| ENSG00000223534.1  | <i>HLA-DQB1-AS1</i> | 6_32605207_C_G_b37 | rs3187964 | 3.70x10 <sup>-21</sup> | -0.39 | Whole Blood                               |
| ENSG00000179344.12 | <i>HLA-DQB1</i>     | 6_32605207_C_G_b37 | rs3187964 | 3.90x10 <sup>-21</sup> | -0.89 | Brain - Nucleus accumbens (basal ganglia) |
| ENSG00000196735.7  | <i>HLA-DQA1</i>     | 6_32605207_C_G_b37 | rs3187964 | 4.30x10 <sup>-21</sup> | -0.64 | Heart - Left Ventricle                    |
| ENSG00000196126.6  | <i>HLA-DRB1</i>     | 6_32605207_C_G_b37 | rs3187964 | 6.50x10 <sup>-21</sup> | -0.36 | Skin - Sun Exposed (Lower leg)            |
| ENSG00000196126.6  | <i>HLA-DRB1</i>     | 6_32605207_C_G_b37 | rs3187964 | 1.20x10 <sup>-20</sup> | -0.36 | Lung                                      |
| ENSG00000229391.3  | <i>HLA-DRB6</i>     | 6_32605207_C_G_b37 | rs3187964 | 1.80x10 <sup>-20</sup> | 0.72  | Heart - Left Ventricle                    |
| ENSG00000196735.7  | <i>HLA-DQA1</i>     | 6_32605207_C_G_b37 | rs3187964 | 2.90x10 <sup>-20</sup> | -0.62 | Pancreas                                  |
| ENSG00000229391.3  | <i>HLA-DRB6</i>     | 6_32605207_C_G_b37 | rs3187964 | 2.90x10 <sup>-20</sup> | 0.55  | Whole Blood                               |
| ENSG00000232629.4  | <i>HLA-DQB2</i>     | 6_32605207_C_G_b37 | rs3187964 | 3.30x10 <sup>-20</sup> | 1     | Brain - Hypothalamus                      |
| ENSG00000232629.4  | <i>HLA-DQB2</i>     | 6_32605207_C_G_b37 | rs3187964 | 4.70x10 <sup>-20</sup> | 1.1   | Ovary                                     |
| ENSG00000223534.1  | <i>HLA-DQB1-AS1</i> | 6_32605207_C_G_b37 | rs3187964 | 5.30x10 <sup>-20</sup> | -0.4  | Lung                                      |

| Gencode Id         | Gene Symbol         | Variant Id         | SNP Id    | P                      | NES   | Tissue                              |
|--------------------|---------------------|--------------------|-----------|------------------------|-------|-------------------------------------|
| ENSG00000232629.4  | <i>HLA-DQB2</i>     | 6_32605207_C_G_b37 | rs3187964 | 7.20x10 <sup>-20</sup> | 0.92  | Prostate                            |
| ENSG00000237541.3  | <i>HLA-DQA2</i>     | 6_32605207_C_G_b37 | rs3187964 | 1.20x10 <sup>-19</sup> | 0.95  | Prostate                            |
| ENSG00000229391.3  | <i>HLA-DRB6</i>     | 6_32605207_C_G_b37 | rs3187964 | 1.40x10 <sup>-19</sup> | 0.62  | Artery - Aorta                      |
| ENSG00000196735.7  | <i>HLA-DQA1</i>     | 6_32605207_C_G_b37 | rs3187964 | 1.60x10 <sup>-19</sup> | -0.46 | Skin - Not Sun Exposed (Suprapubic) |
| ENSG00000237541.3  | <i>HLA-DQA2</i>     | 6_32605207_C_G_b37 | rs3187964 | 1.90x10 <sup>-19</sup> | 0.86  | Spleen                              |
| ENSG00000229391.3  | <i>HLA-DRB6</i>     | 6_32605207_C_G_b37 | rs3187964 | 2.70x10 <sup>-19</sup> | 0.65  | Colon - Transverse                  |
| ENSG00000237541.3  | <i>HLA-DQA2</i>     | 6_32605207_C_G_b37 | rs3187964 | 3.50x10 <sup>-19</sup> | 0.92  | Small Intestine - Terminal Ileum    |
| ENSG00000223534.1  | <i>HLA-DQB1-AS1</i> | 6_32605207_C_G_b37 | rs3187964 | 4.10x10 <sup>-19</sup> | -0.52 | Adipose - Subcutaneous              |
| ENSG00000179344.12 | <i>HLA-DQB1</i>     | 6_32605207_C_G_b37 | rs3187964 | 4.30x10 <sup>-19</sup> | -0.86 | Brain - Hypothalamus                |
| ENSG00000223534.1  | <i>HLA-DQB1-AS1</i> | 6_32605207_C_G_b37 | rs3187964 | 4.80x10 <sup>-19</sup> | -0.45 | Esophagus - Mucosa                  |
| ENSG00000229391.3  | <i>HLA-DRB6</i>     | 6_32605207_C_G_b37 | rs3187964 | 5.10x10 <sup>-19</sup> | 0.62  | Skin - Not Sun Exposed (Suprapubic) |
| ENSG00000237541.3  | <i>HLA-DQA2</i>     | 6_32605207_C_G_b37 | rs3187964 | 5.70x10 <sup>-19</sup> | 0.76  | Heart - Atrial Appendage            |
| ENSG00000196126.6  | <i>HLA-DRB1</i>     | 6_32605207_C_G_b37 | rs3187964 | 1.10x10 <sup>-18</sup> | -0.34 | Muscle - Skeletal                   |
| ENSG00000229391.3  | <i>HLA-DRB6</i>     | 6_32605207_C_G_b37 | rs3187964 | 2.10x10 <sup>-18</sup> | 0.47  | Artery - Tibial                     |
| ENSG00000237541.3  | <i>HLA-DQA2</i>     | 6_32605207_C_G_b37 | rs3187964 | 2.70x10 <sup>-18</sup> | 0.88  | Pituitary                           |
| ENSG00000232629.4  | <i>HLA-DQB2</i>     | 6_32605207_C_G_b37 | rs3187964 | 2.70x10 <sup>-18</sup> | 0.84  | Brain - Hippocampus                 |
| ENSG00000196126.6  | <i>HLA-DRB1</i>     | 6_32605207_C_G_b37 | rs3187964 | 4.10x10 <sup>-18</sup> | -0.39 | Thyroid                             |
| ENSG00000237541.3  | <i>HLA-DQA2</i>     | 6_32605207_C_G_b37 | rs3187964 | 4.60x10 <sup>-18</sup> | 0.78  | Testis                              |
| ENSG00000229391.3  | <i>HLA-DRB6</i>     | 6_32605207_C_G_b37 | rs3187964 | 6.90x10 <sup>-18</sup> | 0.65  | Adipose - Visceral (Omentum)        |
| ENSG00000179344.12 | <i>HLA-DQB1</i>     | 6_32605207_C_G_b37 | rs3187964 | 7.50x10 <sup>-18</sup> | -0.95 | Brain - Substantia nigra            |
| ENSG00000232629.4  | <i>HLA-DQB2</i>     | 6_32605207_C_G_b37 | rs3187964 | 1.40x10 <sup>-17</sup> | 0.98  | Uterus                              |
| ENSG00000179344.12 | <i>HLA-DQB1</i>     | 6_32605207_C_G_b37 | rs3187964 | 1.90x10 <sup>-17</sup> | -0.85 | Brain - Spinal cord (cervical c-1)  |
| ENSG00000196735.7  | <i>HLA-DQA1</i>     | 6_32605207_C_G_b37 | rs3187964 | 2.90x10 <sup>-17</sup> | -0.5  | Breast - Mammary Tissue             |
| ENSG00000232629.4  | <i>HLA-DQB2</i>     | 6_32605207_C_G_b37 | rs3187964 | 3.90x10 <sup>-17</sup> | 0.83  | Liver                               |
| ENSG00000223534.1  | <i>HLA-DQB1-AS1</i> | 6_32605207_C_G_b37 | rs3187964 | 4.30x10 <sup>-17</sup> | -0.51 | Heart - Atrial Appendage            |
| ENSG00000179344.12 | <i>HLA-DQB1</i>     | 6_32605207_C_G_b37 | rs3187964 | 8.10x10 <sup>-17</sup> | -0.81 | Brain - Amygdala                    |
| ENSG00000196735.7  | <i>HLA-DQA1</i>     | 6_32605207_C_G_b37 | rs3187964 | 1.30x10 <sup>-16</sup> | -0.41 | Adipose - Subcutaneous              |
| ENSG00000196126.6  | <i>HLA-DRB1</i>     | 6_32605207_C_G_b37 | rs3187964 | 3.30x10 <sup>-16</sup> | -0.35 | Skin - Not Sun Exposed (Suprapubic) |
| ENSG00000223534.1  | <i>HLA-DQB1-AS1</i> | 6_32605207_C_G_b37 | rs3187964 | 3.40x10 <sup>-16</sup> | -0.38 | Thyroid                             |
| ENSG00000223534.1  | <i>HLA-DQB1-AS1</i> | 6_32605207_C_G_b37 | rs3187964 | 3.90x10 <sup>-16</sup> | -0.46 | Artery - Aorta                      |

| Gencode Id         | Gene Symbol         | Variant Id         | SNP Id    | P                      | NES   | Tissue                                    |
|--------------------|---------------------|--------------------|-----------|------------------------|-------|-------------------------------------------|
| ENSG00000237541.3  | <i>HLA-DQA2</i>     | 6_32605207_C_G_b37 | rs3187964 | 6.00x10 <sup>-16</sup> | 0.84  | Brain - Hippocampus                       |
| ENSG00000237541.3  | <i>HLA-DQA2</i>     | 6_32605207_C_G_b37 | rs3187964 | 1.10x10 <sup>-15</sup> | 0.82  | Brain - Nucleus accumbens (basal ganglia) |
| ENSG00000229391.3  | <i>HLA-DRB6</i>     | 6_32605207_C_G_b37 | rs3187964 | 1.90x10 <sup>-15</sup> | 0.61  | Breast - Mammary Tissue                   |
| ENSG00000196735.7  | <i>HLA-DQA1</i>     | 6_32605207_C_G_b37 | rs3187964 | 2.40x10 <sup>-15</sup> | -0.57 | Colon - Sigmoid                           |
| ENSG00000223534.1  | <i>HLA-DQB1-AS1</i> | 6_32605207_C_G_b37 | rs3187964 | 2.40x10 <sup>-15</sup> | -0.36 | Artery - Tibial                           |
| ENSG00000237541.3  | <i>HLA-DQA2</i>     | 6_32605207_C_G_b37 | rs3187964 | 3.10x10 <sup>-15</sup> | 0.79  | Brain - Caudate (basal ganglia)           |
| ENSG00000223534.1  | <i>HLA-DQB1-AS1</i> | 6_32605207_C_G_b37 | rs3187964 | 3.10x10 <sup>-15</sup> | -0.4  | Nerve - Tibial                            |
| ENSG00000196735.7  | <i>HLA-DQA1</i>     | 6_32605207_C_G_b37 | rs3187964 | 3.20x10 <sup>-15</sup> | -0.43 | Stomach                                   |
| ENSG00000229391.3  | <i>HLA-DRB6</i>     | 6_32605207_C_G_b37 | rs3187964 | 6.70x10 <sup>-15</sup> | 0.7   | Esophagus - Gastroesophageal Junction     |
| ENSG00000223534.1  | <i>HLA-DQB1-AS1</i> | 6_32605207_C_G_b37 | rs3187964 | 8.10x10 <sup>-15</sup> | -0.53 | Breast - Mammary Tissue                   |
| ENSG00000232629.4  | <i>HLA-DQB2</i>     | 6_32605207_C_G_b37 | rs3187964 | 8.60x10 <sup>-15</sup> | 0.87  | Brain - Cortex                            |
| ENSG00000237541.3  | <i>HLA-DQA2</i>     | 6_32605207_C_G_b37 | rs3187964 | 9.20x10 <sup>-15</sup> | 0.87  | Adrenal Gland                             |
| ENSG00000232629.4  | <i>HLA-DQB2</i>     | 6_32605207_C_G_b37 | rs3187964 | 1.40x10 <sup>-14</sup> | 0.87  | Brain - Anterior cingulate cortex (BA24)  |
| ENSG00000232629.4  | <i>HLA-DQB2</i>     | 6_32605207_C_G_b37 | rs3187964 | 1.50x10 <sup>-14</sup> | 0.84  | Brain - Substantia nigra                  |
| ENSG00000232629.4  | <i>HLA-DQB2</i>     | 6_32605207_C_G_b37 | rs3187964 | 3.20x10 <sup>-14</sup> | 0.79  | Brain - Putamen (basal ganglia)           |
| ENSG00000179344.12 | <i>HLA-DQB1</i>     | 6_32605207_C_G_b37 | rs3187964 | 3.50x10 <sup>-14</sup> | -0.93 | Minor Salivary Gland                      |
| ENSG00000232629.4  | <i>HLA-DQB2</i>     | 6_32605207_C_G_b37 | rs3187964 | 7.50x10 <sup>-14</sup> | 0.72  | Brain - Nucleus accumbens (basal ganglia) |
| ENSG00000237541.3  | <i>HLA-DQA2</i>     | 6_32605207_C_G_b37 | rs3187964 | 1.10x10 <sup>-13</sup> | 0.79  | Artery - Coronary                         |
| ENSG00000229391.3  | <i>HLA-DRB6</i>     | 6_32605207_C_G_b37 | rs3187964 | 1.10x10 <sup>-13</sup> | 0.6   | Testis                                    |
| ENSG00000196735.7  | <i>HLA-DQA1</i>     | 6_32605207_C_G_b37 | rs3187964 | 1.30x10 <sup>-13</sup> | -0.39 | Artery - Aorta                            |
| ENSG00000196126.6  | <i>HLA-DRB1</i>     | 6_32605207_C_G_b37 | rs3187964 | 1.30x10 <sup>-13</sup> | -0.24 | Artery - Tibial                           |
| ENSG00000229391.3  | <i>HLA-DRB6</i>     | 6_32605207_C_G_b37 | rs3187964 | 1.40x10 <sup>-13</sup> | 0.7   | Colon - Sigmoid                           |
| ENSG00000196735.7  | <i>HLA-DQA1</i>     | 6_32605207_C_G_b37 | rs3187964 | 1.50x10 <sup>-13</sup> | -0.38 | Colon - Transverse                        |
| ENSG00000229391.3  | <i>HLA-DRB6</i>     | 6_32605207_C_G_b37 | rs3187964 | 3.20x10 <sup>-13</sup> | 0.61  | Heart - Atrial Appendage                  |
| ENSG00000229391.3  | <i>HLA-DRB6</i>     | 6_32605207_C_G_b37 | rs3187964 | 5.10x10 <sup>-13</sup> | 0.8   | Cells - EBV-transformed lymphocytes       |
| ENSG00000223534.1  | <i>HLA-DQB1-AS1</i> | 6_32605207_C_G_b37 | rs3187964 | 7.20x10 <sup>-13</sup> | -0.35 | Skin - Not Sun Exposed (Suprapubic)       |
| ENSG00000232629.4  | <i>HLA-DQB2</i>     | 6_32605207_C_G_b37 | rs3187964 | 1.20x10 <sup>-12</sup> | 0.91  | Brain - Frontal Cortex (BA9)              |
| ENSG00000179344.12 | <i>HLA-DQB1</i>     | 6_32605207_C_G_b37 | rs3187964 | 1.40x10 <sup>-12</sup> | -0.71 | Ovary                                     |
| ENSG00000237541.3  | <i>HLA-DQA2</i>     | 6_32605207_C_G_b37 | rs3187964 | 1.90x10 <sup>-12</sup> | 0.88  | Brain - Frontal Cortex (BA9)              |
| ENSG00000232629.4  | <i>HLA-DQB2</i>     | 6_32605207_C_G_b37 | rs3187964 | 2.90x10 <sup>-12</sup> | 0.73  | Brain - Cerebellum                        |

| Gencode Id         | Gene Symbol              | Variant Id         | SNP Id    | P                      | NES   | Tissue                                   |
|--------------------|--------------------------|--------------------|-----------|------------------------|-------|------------------------------------------|
| ENSG00000196301.3  | <i>HLA-DRB9</i>          | 6_32605207_C_G_b37 | rs3187964 | 3.10x10 <sup>-12</sup> | 0.43  | Lung                                     |
| ENSG00000223534.1  | <i>HLA-DQB1-AS1</i>      | 6_32605207_C_G_b37 | rs3187964 | 3.60x10 <sup>-12</sup> | -0.67 | Liver                                    |
| ENSG00000237541.3  | <i>HLA-DQA2</i>          | 6_32605207_C_G_b37 | rs3187964 | 4.50x10 <sup>-12</sup> | 0.9   | Ovary                                    |
| ENSG00000232629.4  | <i>HLA-DQB2</i>          | 6_32605207_C_G_b37 | rs3187964 | 7.60x10 <sup>-12</sup> | 0.34  | Esophagus - Mucosa                       |
| ENSG00000237541.3  | <i>HLA-DQA2</i>          | 6_32605207_C_G_b37 | rs3187964 | 7.70x10 <sup>-12</sup> | 0.8   | Brain - Cortex                           |
| ENSG00000232629.4  | <i>HLA-DQB2</i>          | 6_32605207_C_G_b37 | rs3187964 | 7.80x10 <sup>-12</sup> | 0.88  | Minor Salivary Gland                     |
| ENSG00000196126.6  | <i>HLA-DRB1</i>          | 6_32605207_C_G_b37 | rs3187964 | 8.30x10 <sup>-12</sup> | -0.26 | Esophagus - Mucosa                       |
| ENSG00000237541.3  | <i>HLA-DQA2</i>          | 6_32605207_C_G_b37 | rs3187964 | 9.40x10 <sup>-12</sup> | 0.82  | Brain - Hypothalamus                     |
| ENSG00000237541.3  | <i>HLA-DQA2</i>          | 6_32605207_C_G_b37 | rs3187964 | 1.10x10 <sup>-11</sup> | 0.91  | Uterus                                   |
| ENSG00000196735.7  | <i>HLA-DQA1</i>          | 6_32605207_C_G_b37 | rs3187964 | 1.10x10 <sup>-11</sup> | -0.49 | Spleen                                   |
| ENSG00000179344.12 | <i>HLA-DQB1</i>          | 6_32605207_C_G_b37 | rs3187964 | 1.10x10 <sup>-11</sup> | -0.65 | Adrenal Gland                            |
| ENSG00000229391.3  | <i>HLA-DRB6</i>          | 6_32605207_C_G_b37 | rs3187964 | 1.40x10 <sup>-11</sup> | 0.54  | Pancreas                                 |
| ENSG00000196126.6  | <i>HLA-DRB1</i>          | 6_32605207_C_G_b37 | rs3187964 | 3.30x10 <sup>-11</sup> | -0.29 | Adipose - Subcutaneous                   |
| ENSG00000232629.4  | <i>HLA-DQB2</i>          | 6_32605207_C_G_b37 | rs3187964 | 3.30x10 <sup>-11</sup> | 0.8   | Brain - Spinal cord (cervical c-1)       |
| ENSG00000241287.1  | <i>XXbac-BPG254F23.6</i> | 6_32605207_C_G_b37 | rs3187964 | 4.30x10 <sup>-11</sup> | -0.45 | Nerve - Tibial                           |
| ENSG00000237541.3  | <i>HLA-DQA2</i>          | 6_32605207_C_G_b37 | rs3187964 | 4.50x10 <sup>-11</sup> | 0.91  | Minor Salivary Gland                     |
| ENSG00000223534.1  | <i>HLA-DQB1-AS1</i>      | 6_32605207_C_G_b37 | rs3187964 | 5.70x10 <sup>-11</sup> | -0.34 | Esophagus - Muscularis                   |
| ENSG00000237541.3  | <i>HLA-DQA2</i>          | 6_32605207_C_G_b37 | rs3187964 | 6.60x10 <sup>-11</sup> | 0.75  | Brain - Anterior cingulate cortex (BA24) |
| ENSG00000223534.1  | <i>HLA-DQB1-AS1</i>      | 6_32605207_C_G_b37 | rs3187964 | 6.60x10 <sup>-11</sup> | -0.59 | Spleen                                   |
| ENSG00000196735.7  | <i>HLA-DQA1</i>          | 6_32605207_C_G_b37 | rs3187964 | 6.80x10 <sup>-11</sup> | -0.44 | Pituitary                                |
| ENSG00000196735.7  | <i>HLA-DQA1</i>          | 6_32605207_C_G_b37 | rs3187964 | 7.70x10 <sup>-11</sup> | -0.39 | Brain - Caudate (basal ganglia)          |
| ENSG00000232629.4  | <i>HLA-DQB2</i>          | 6_32605207_C_G_b37 | rs3187964 | 8.80x10 <sup>-11</sup> | 0.79  | Brain - Amygdala                         |
| ENSG00000196126.6  | <i>HLA-DRB1</i>          | 6_32605207_C_G_b37 | rs3187964 | 1.00x10 <sup>-10</sup> | -0.49 | Brain - Frontal Cortex (BA9)             |
| ENSG00000223534.1  | <i>HLA-DQB1-AS1</i>      | 6_32605207_C_G_b37 | rs3187964 | 1.10x10 <sup>-10</sup> | -0.41 | Heart - Left Ventricle                   |
| ENSG00000198502.5  | <i>HLA-DRB5</i>          | 6_32605207_C_G_b37 | rs3187964 | 1.10x10 <sup>-10</sup> | -0.48 | Thyroid                                  |
| ENSG00000232629.4  | <i>HLA-DQB2</i>          | 6_32605207_C_G_b37 | rs3187964 | 1.50x10 <sup>-10</sup> | 0.78  | Brain - Cerebellar Hemisphere            |
| ENSG00000237541.3  | <i>HLA-DQA2</i>          | 6_32605207_C_G_b37 | rs3187964 | 2.00x10 <sup>-10</sup> | 0.72  | Liver                                    |
| ENSG00000223534.1  | <i>HLA-DQB1-AS1</i>      | 6_32605207_C_G_b37 | rs3187964 | 2.40x10 <sup>-10</sup> | -0.46 | Stomach                                  |

| Gencode Id         | Gene Symbol              | Variant Id         | SNP Id    | P                      | NES   | Tissue                                   |
|--------------------|--------------------------|--------------------|-----------|------------------------|-------|------------------------------------------|
| ENSG00000241287.1  | <i>XXbac-BPG254F23.6</i> | 6_32605207_C_G_b37 | rs3187964 | 2.40x10 <sup>-10</sup> | -0.49 | Breast - Mammary Tissue                  |
| ENSG00000229391.3  | <i>HLA-DRB6</i>          | 6_32605207_C_G_b37 | rs3187964 | 2.50x10 <sup>-10</sup> | 0.68  | Spleen                                   |
| ENSG00000198502.5  | <i>HLA-DRB5</i>          | 6_32605207_C_G_b37 | rs3187964 | 2.60x10 <sup>-10</sup> | -0.41 | Esophagus - Mucosa                       |
| ENSG00000196735.7  | <i>HLA-DQA1</i>          | 6_32605207_C_G_b37 | rs3187964 | 3.00x10 <sup>-10</sup> | -0.42 | Artery - Coronary                        |
| ENSG00000229391.3  | <i>HLA-DRB6</i>          | 6_32605207_C_G_b37 | rs3187964 | 3.50x10 <sup>-10</sup> | 0.66  | Liver                                    |
| ENSG00000237541.3  | <i>HLA-DQA2</i>          | 6_32605207_C_G_b37 | rs3187964 | 3.50x10 <sup>-10</sup> | 0.72  | Brain - Putamen (basal ganglia)          |
| ENSG00000237541.3  | <i>HLA-DQA2</i>          | 6_32605207_C_G_b37 | rs3187964 | 3.60x10 <sup>-10</sup> | 0.77  | Brain - Spinal cord (cervical c-1)       |
| ENSG00000196126.6  | <i>HLA-DRB1</i>          | 6_32605207_C_G_b37 | rs3187964 | 5.40x10 <sup>-10</sup> | -0.44 | Heart - Atrial Appendage                 |
| ENSG00000237541.3  | <i>HLA-DQA2</i>          | 6_32605207_C_G_b37 | rs3187964 | 7.70x10 <sup>-10</sup> | 0.8   | Brain - Cerebellar Hemisphere            |
| ENSG00000223534.1  | <i>HLA-DQB1-AS1</i>      | 6_32605207_C_G_b37 | rs3187964 | 8.00x10 <sup>-10</sup> | -0.57 | Brain - Cerebellum                       |
| ENSG00000237541.3  | <i>HLA-DQA2</i>          | 6_32605207_C_G_b37 | rs3187964 | 9.30x10 <sup>-10</sup> | 0.79  | Brain - Substantia nigra                 |
| ENSG00000241287.1  | <i>XXbac-BPG254F23.6</i> | 6_32605207_C_G_b37 | rs3187964 | 9.70x10 <sup>-10</sup> | -0.43 | Adipose - Subcutaneous                   |
| ENSG00000223534.1  | <i>HLA-DQB1-AS1</i>      | 6_32605207_C_G_b37 | rs3187964 | 1.20x10 <sup>-09</sup> | -0.51 | Prostate                                 |
| ENSG00000179344.12 | <i>HLA-DQB1</i>          | 6_32605207_C_G_b37 | rs3187964 | 1.30x10 <sup>-09</sup> | -0.68 | Brain - Anterior cingulate cortex (BA24) |
| ENSG00000237541.3  | <i>HLA-DQA2</i>          | 6_32605207_C_G_b37 | rs3187964 | 1.90x10 <sup>-09</sup> | 0.77  | Vagina                                   |
| ENSG00000196735.7  | <i>HLA-DQA1</i>          | 6_32605207_C_G_b37 | rs3187964 | 2.30x10 <sup>-09</sup> | -0.54 | Prostate                                 |
| ENSG00000223534.1  | <i>HLA-DQB1-AS1</i>      | 6_32605207_C_G_b37 | rs3187964 | 2.30x10 <sup>-09</sup> | -0.38 | Colon - Transverse                       |
| ENSG00000229391.3  | <i>HLA-DRB6</i>          | 6_32605207_C_G_b37 | rs3187964 | 3.30x10 <sup>-09</sup> | 0.65  | Prostate                                 |
| ENSG00000196126.6  | <i>HLA-DRB1</i>          | 6_32605207_C_G_b37 | rs3187964 | 3.40x10 <sup>-09</sup> | -0.47 | Brain - Cortex                           |
| ENSG00000229391.3  | <i>HLA-DRB6</i>          | 6_32605207_C_G_b37 | rs3187964 | 4.00x10 <sup>-09</sup> | 0.68  | Adrenal Gland                            |
| ENSG00000229391.3  | <i>HLA-DRB6</i>          | 6_32605207_C_G_b37 | rs3187964 | 4.10x10 <sup>-09</sup> | 0.64  | Brain - Hippocampus                      |
| ENSG00000198502.5  | <i>HLA-DRB5</i>          | 6_32605207_C_G_b37 | rs3187964 | 4.70x10 <sup>-09</sup> | -0.35 | Muscle - Skeletal                        |
| ENSG00000229391.3  | <i>HLA-DRB6</i>          | 6_32605207_C_G_b37 | rs3187964 | 6.10x10 <sup>-09</sup> | 0.52  | Brain - Caudate (basal ganglia)          |
| ENSG00000196301.3  | <i>HLA-DRB9</i>          | 6_32605207_C_G_b37 | rs3187964 | 8.20x10 <sup>-09</sup> | 0.33  | Whole Blood                              |
| ENSG00000229391.3  | <i>HLA-DRB6</i>          | 6_32605207_C_G_b37 | rs3187964 | 8.80x10 <sup>-09</sup> | 0.66  | Ovary                                    |
| ENSG00000237541.3  | <i>HLA-DQA2</i>          | 6_32605207_C_G_b37 | rs3187964 | 1.30x10 <sup>-08</sup> | 0.64  | Brain - Cerebellum                       |
| ENSG00000237541.3  | <i>HLA-DQA2</i>          | 6_32605207_C_G_b37 | rs3187964 | 1.50x10 <sup>-08</sup> | 0.76  | Brain - Amygdala                         |
| ENSG00000196301.3  | <i>HLA-DRB9</i>          | 6_32605207_C_G_b37 | rs3187964 | 1.50x10 <sup>-08</sup> | 0.4   | Thyroid                                  |

| Gencode Id        | Gene Symbol         | Variant Id         | SNP Id    | P                      | NES   | Tissue                                    |
|-------------------|---------------------|--------------------|-----------|------------------------|-------|-------------------------------------------|
| ENSG00000196735.7 | <i>HLA-DQA1</i>     | 6_32605207_C_G_b37 | rs3187964 | 1.60x10 <sup>-08</sup> | -0.62 | Cells - EBV-transformed lymphocytes       |
| ENSG00000196126.6 | <i>HLA-DRB1</i>     | 6_32605207_C_G_b37 | rs3187964 | 2.20x10 <sup>-08</sup> | -0.42 | Brain - Anterior cingulate cortex (BA24)  |
| ENSG00000223534.1 | <i>HLA-DQB1-AS1</i> | 6_32605207_C_G_b37 | rs3187964 | 2.20x10 <sup>-08</sup> | -0.35 | Esophagus - Gastroesophageal Junction     |
| ENSG00000196301.3 | <i>HLA-DRB9</i>     | 6_32605207_C_G_b37 | rs3187964 | 2.20x10 <sup>-08</sup> | 0.41  | Adipose - Subcutaneous                    |
| ENSG00000196126.6 | <i>HLA-DRB1</i>     | 6_32605207_C_G_b37 | rs3187964 | 2.30x10 <sup>-08</sup> | -0.27 | Breast - Mammary Tissue                   |
| ENSG00000196126.6 | <i>HLA-DRB1</i>     | 6_32605207_C_G_b37 | rs3187964 | 2.90x10 <sup>-08</sup> | -0.45 | Brain - Cerebellum                        |
| ENSG00000198502.5 | <i>HLA-DRB5</i>     | 6_32605207_C_G_b37 | rs3187964 | 4.40x10 <sup>-08</sup> | -0.37 | Lung                                      |
| ENSG00000223534.1 | <i>HLA-DQB1-AS1</i> | 6_32605207_C_G_b37 | rs3187964 | 4.50x10 <sup>-08</sup> | -0.35 | Colon - Sigmoid                           |
| ENSG00000223534.1 | <i>HLA-DQB1-AS1</i> | 6_32605207_C_G_b37 | rs3187964 | 4.80x10 <sup>-08</sup> | -0.6  | Brain - Anterior cingulate cortex (BA24)  |
| ENSG00000198502.5 | <i>HLA-DRB5</i>     | 6_32605207_C_G_b37 | rs3187964 | 5.00x10 <sup>-08</sup> | -0.34 | Artery - Tibial                           |
| ENSG00000196735.7 | <i>HLA-DQA1</i>     | 6_32605207_C_G_b37 | rs3187964 | 6.50x10 <sup>-08</sup> | -0.38 | Liver                                     |
| ENSG00000229391.3 | <i>HLA-DRB6</i>     | 6_32605207_C_G_b37 | rs3187964 | 7.00x10 <sup>-08</sup> | 0.56  | Brain - Cerebellum                        |
| ENSG00000223534.1 | <i>HLA-DQB1-AS1</i> | 6_32605207_C_G_b37 | rs3187964 | 7.40x10 <sup>-08</sup> | -0.58 | Brain - Hippocampus                       |
| ENSG00000223534.1 | <i>HLA-DQB1-AS1</i> | 6_32605207_C_G_b37 | rs3187964 | 8.40x10 <sup>-08</sup> | -0.63 | Brain - Nucleus accumbens (basal ganglia) |
| ENSG00000229391.3 | <i>HLA-DRB6</i>     | 6_32605207_C_G_b37 | rs3187964 | 9.40x10 <sup>-08</sup> | 0.52  | Pituitary                                 |
| ENSG00000196301.3 | <i>HLA-DRB9</i>     | 6_32605207_C_G_b37 | rs3187964 | 1.10x10 <sup>-07</sup> | 0.4   | Adipose - Visceral (Omentum)              |
| ENSG00000229391.3 | <i>HLA-DRB6</i>     | 6_32605207_C_G_b37 | rs3187964 | 1.40x10 <sup>-07</sup> | 0.55  | Brain - Nucleus accumbens (basal ganglia) |
| ENSG00000196735.7 | <i>HLA-DQA1</i>     | 6_32605207_C_G_b37 | rs3187964 | 1.60x10 <sup>-07</sup> | -0.37 | Testis                                    |
| ENSG00000223534.1 | <i>HLA-DQB1-AS1</i> | 6_32605207_C_G_b37 | rs3187964 | 1.80x10 <sup>-07</sup> | -0.39 | Pancreas                                  |
| ENSG00000223534.1 | <i>HLA-DQB1-AS1</i> | 6_32605207_C_G_b37 | rs3187964 | 2.00x10 <sup>-07</sup> | -0.51 | Brain - Caudate (basal ganglia)           |
| ENSG00000196126.6 | <i>HLA-DRB1</i>     | 6_32605207_C_G_b37 | rs3187964 | 2.50x10 <sup>-07</sup> | -0.2  | Nerve - Tibial                            |
| ENSG00000229391.3 | <i>HLA-DRB6</i>     | 6_32605207_C_G_b37 | rs3187964 | 2.90x10 <sup>-07</sup> | 0.5   | Artery - Coronary                         |
| ENSG00000223534.1 | <i>HLA-DQB1-AS1</i> | 6_32605207_C_G_b37 | rs3187964 | 3.10x10 <sup>-07</sup> | -0.71 | Brain - Spinal cord (cervical c-1)        |
| ENSG00000229391.3 | <i>HLA-DRB6</i>     | 6_32605207_C_G_b37 | rs3187964 | 3.60x10 <sup>-07</sup> | 0.59  | Brain - Putamen (basal ganglia)           |
| ENSG00000198502.5 | <i>HLA-DRB5</i>     | 6_32605207_C_G_b37 | rs3187964 | 3.70x10 <sup>-07</sup> | -0.36 | Adipose - Subcutaneous                    |
| ENSG00000223534.1 | <i>HLA-DQB1-AS1</i> | 6_32605207_C_G_b37 | rs3187964 | 4.20x10 <sup>-07</sup> | -0.37 | Testis                                    |
| ENSG00000196735.7 | <i>HLA-DQA1</i>     | 6_32605207_C_G_b37 | rs3187964 | 4.90x10 <sup>-07</sup> | -0.41 | Brain - Anterior cingulate cortex (BA24)  |
| ENSG00000223534.1 | <i>HLA-DQB1-AS1</i> | 6_32605207_C_G_b37 | rs3187964 | 5.30x10 <sup>-07</sup> | -0.5  | Pituitary                                 |
| ENSG00000223534.1 | <i>HLA-DQB1-AS1</i> | 6_32605207_C_G_b37 | rs3187964 | 5.80x10 <sup>-07</sup> | -0.5  | Vagina                                    |
| ENSG00000196735.7 | <i>HLA-DQA1</i>     | 6_32605207_C_G_b37 | rs3187964 | 5.80x10 <sup>-07</sup> | -0.3  | Small Intestine - Terminal Ileum          |



| Gencode Id         | Gene Symbol              | Variant Id         | SNP Id    | P                      | NES   | Tissue                                   |
|--------------------|--------------------------|--------------------|-----------|------------------------|-------|------------------------------------------|
| ENSG00000196126.6  | <i>HLA-DRB1</i>          | 6_32605207_C_G_b37 | rs3187964 | 6.40x10 <sup>-07</sup> | -0.3  | Brain - Caudate (basal ganglia)          |
| ENSG00000179344.12 | <i>HLA-DQB1</i>          | 6_32605207_C_G_b37 | rs3187964 | 7.40x10 <sup>-07</sup> | -0.47 | Brain - Cortex                           |
| ENSG00000223534.1  | <i>HLA-DQB1-AS1</i>      | 6_32605207_C_G_b37 | rs3187964 | 7.70x10 <sup>-07</sup> | -0.56 | Brain - Cortex                           |
| ENSG00000196301.3  | <i>HLA-DRB9</i>          | 6_32605207_C_G_b37 | rs3187964 | 0.0000011              | 0.39  | Artery - Aorta                           |
| ENSG00000196126.6  | <i>HLA-DRB1</i>          | 6_32605207_C_G_b37 | rs3187964 | 0.0000015              | -0.25 | Artery - Coronary                        |
| ENSG00000229391.3  | <i>HLA-DRB6</i>          | 6_32605207_C_G_b37 | rs3187964 | 0.0000015              | 0.46  | Brain - Anterior cingulate cortex (BA24) |
| ENSG00000196126.6  | <i>HLA-DRB1</i>          | 6_32605207_C_G_b37 | rs3187964 | 0.0000019              | -0.26 | Heart - Left Ventricle                   |
| ENSG00000241287.1  | <i>XXbac-BPG254F23.6</i> | 6_32605207_C_G_b37 | rs3187964 | 0.0000022              | -0.57 | Spleen                                   |
| ENSG00000229391.3  | <i>HLA-DRB6</i>          | 6_32605207_C_G_b37 | rs3187964 | 0.0000023              | 0.59  | Uterus                                   |
| ENSG00000223534.1  | <i>HLA-DQB1-AS1</i>      | 6_32605207_C_G_b37 | rs3187964 | 0.0000025              | -0.33 | Artery - Coronary                        |
| ENSG00000229391.3  | <i>HLA-DRB6</i>          | 6_32605207_C_G_b37 | rs3187964 | 0.0000028              | 0.6   | Brain - Substantia nigra                 |
| ENSG00000196126.6  | <i>HLA-DRB1</i>          | 6_32605207_C_G_b37 | rs3187964 | 0.0000028              | -0.28 | Pituitary                                |
| ENSG00000223534.1  | <i>HLA-DQB1-AS1</i>      | 6_32605207_C_G_b37 | rs3187964 | 0.0000033              | -0.59 | Brain - Hypothalamus                     |
| ENSG00000196126.6  | <i>HLA-DRB1</i>          | 6_32605207_C_G_b37 | rs3187964 | 0.0000034              | -0.12 | Whole Blood                              |
| ENSG00000223534.1  | <i>HLA-DQB1-AS1</i>      | 6_32605207_C_G_b37 | rs3187964 | 0.0000035              | -0.34 | Small Intestine - Terminal Ileum         |
| ENSG00000196126.6  | <i>HLA-DRB1</i>          | 6_32605207_C_G_b37 | rs3187964 | 0.0000036              | -0.34 | Testis                                   |
| ENSG00000196126.6  | <i>HLA-DRB1</i>          | 6_32605207_C_G_b37 | rs3187964 | 0.0000037              | -0.23 | Adipose - Visceral (Omentum)             |
| ENSG00000241287.1  | <i>XXbac-BPG254F23.6</i> | 6_32605207_C_G_b37 | rs3187964 | 0.0000038              | -0.31 | Lung                                     |
| ENSG00000198502.5  | <i>HLA-DRB5</i>          | 6_32605207_C_G_b37 | rs3187964 | 0.0000049              | -0.43 | Heart - Atrial Appendage                 |
| ENSG00000244731.3  | <i>C4A</i>               | 6_32605207_C_G_b37 | rs3187964 | 0.000006               | -0.22 | Thyroid                                  |
| ENSG00000198502.5  | <i>HLA-DRB5</i>          | 6_32605207_C_G_b37 | rs3187964 | 0.000006               | -0.42 | Heart - Left Ventricle                   |
| ENSG00000196126.6  | <i>HLA-DRB1</i>          | 6_32605207_C_G_b37 | rs3187964 | 0.0000066              | -0.25 | Pancreas                                 |
| ENSG00000204301.5  | <i>NOTCH4</i>            | 6_32605207_C_G_b37 | rs3187964 | 0.000008               | -0.16 | Adipose - Subcutaneous                   |
| ENSG00000196301.3  | <i>HLA-DRB9</i>          | 6_32605207_C_G_b37 | rs3187964 | 0.000008               | 0.37  | Breast - Mammary Tissue                  |
| ENSG00000196735.7  | <i>HLA-DQA1</i>          | 6_32605207_C_G_b37 | rs3187964 | 0.000009               | -0.57 | Minor Salivary Gland                     |
| ENSG00000196126.6  | <i>HLA-DRB1</i>          | 6_32605207_C_G_b37 | rs3187964 | 0.0000093              | -0.36 | Brain - Putamen (basal ganglia)          |
| ENSG00000196301.3  | <i>HLA-DRB9</i>          | 6_32605207_C_G_b37 | rs3187964 | 0.0000093              | 0.3   | Nerve - Tibial                           |
| ENSG00000196735.7  | <i>HLA-DQA1</i>          | 6_32605207_C_G_b37 | rs3187964 | 0.0000094              | -0.41 | Brain - Putamen (basal ganglia)          |

| <b>Gencode Id</b>  | <b>Gene Symbol</b> | <b>Variant Id</b>  | <b>SNP Id</b> | <b>P</b>  | <b>NES</b> | <b>Tissue</b>                       |
|--------------------|--------------------|--------------------|---------------|-----------|------------|-------------------------------------|
| ENSG00000229391.3  | <i>HLA-DRB6</i>    | 6_32605207_C_G_b37 | rs3187964     | 0.0000095 | 0.53       | Brain - Cerebellar Hemisphere       |
| ENSG00000244731.3  | <i>C4A</i>         | 6_32605207_C_G_b37 | rs3187964     | 0.000015  | -0.25      | Heart - Left Ventricle              |
| ENSG00000244731.3  | <i>C4A</i>         | 6_32605207_C_G_b37 | rs3187964     | 0.000015  | -0.23      | Skin - Sun Exposed (Lower leg)      |
| ENSG00000179344.12 | <i>HLA-DQB1</i>    | 6_32605207_C_G_b37 | rs3187964     | 0.000015  | -0.51      | Brain - Frontal Cortex (BA9)        |
| ENSG00000229391.3  | <i>HLA-DRB6</i>    | 6_32605207_C_G_b37 | rs3187964     | 0.000017  | 0.47       | Small Intestine - Terminal Ileum    |
| ENSG00000204301.5  | <i>NOTCH4</i>      | 6_32605207_C_G_b37 | rs3187964     | 0.000019  | -0.12      | Skin - Sun Exposed (Lower leg)      |
| ENSG00000204305.9  | <i>AGER</i>        | 6_32605207_C_G_b37 | rs3187964     | 0.00002   | 0.2        | Nerve - Tibial                      |
| ENSG00000198502.5  | <i>HLA-DRB5</i>    | 6_32605207_C_G_b37 | rs3187964     | 0.00003   | -0.32      | Colon - Transverse                  |
| ENSG00000244731.3  | <i>C4A</i>         | 6_32605207_C_G_b37 | rs3187964     | 0.000034  | -0.25      | Nerve - Tibial                      |
| ENSG00000204301.5  | <i>NOTCH4</i>      | 6_32605207_C_G_b37 | rs3187964     | 0.000036  | -0.16      | Skin - Not Sun Exposed (Suprapubic) |
| ENSG00000198502.5  | <i>HLA-DRB5</i>    | 6_32605207_C_G_b37 | rs3187964     | 0.000037  | -0.21      | Whole Blood                         |
| ENSG00000198502.5  | <i>HLA-DRB5</i>    | 6_32605207_C_G_b37 | rs3187964     | 0.000045  | -0.27      | Skin - Sun Exposed (Lower leg)      |
| ENSG00000204301.5  | <i>NOTCH4</i>      | 6_32605207_C_G_b37 | rs3187964     | 0.000045  | -0.16      | Adipose - Visceral (Omentum)        |
| ENSG00000198502.5  | <i>HLA-DRB5</i>    | 6_32605207_C_G_b37 | rs3187964     | 0.000049  | -0.29      | Skin - Not Sun Exposed (Suprapubic) |

NES = normalized effect size computed as the effect of the alternative allele relative to the reference allele in the human genome reference (hg19)

Table S10. Single-Tissue eQTL for ts114598080 in the GTEx project

| Gencode Id         | Gene Symbol              | Variant Id         | SNP Id      | P-Value                | NES   | Tissue                                |
|--------------------|--------------------------|--------------------|-------------|------------------------|-------|---------------------------------------|
| ENSG00000204531.11 | <i>POU5F1</i>            | 6_31255442_G_A_b37 | rs114598080 | 3.20x10 <sup>-11</sup> | -0.9  | Skin - Sun Exposed (Lower leg)        |
| ENSG00000204531.11 | <i>POU5F1</i>            | 6_31255442_G_A_b37 | rs114598080 | 5.10x10 <sup>-11</sup> | -0.9  | Artery - Tibial                       |
| ENSG00000204531.11 | <i>POU5F1</i>            | 6_31255442_G_A_b37 | rs114598080 | 4.40x10 <sup>-08</sup> | -0.73 | Heart - Left Ventricle                |
| ENSG00000204531.11 | <i>POU5F1</i>            | 6_31255442_G_A_b37 | rs114598080 | 4.40x10 <sup>-08</sup> | -0.88 | Nerve - Tibial                        |
| ENSG00000204528.3  | <i>PSORS1C3</i>          | 6_31255442_G_A_b37 | rs114598080 | 2.90x10 <sup>-07</sup> | -0.84 | Skin - Sun Exposed (Lower leg)        |
| ENSG00000204531.11 | <i>POU5F1</i>            | 6_31255442_G_A_b37 | rs114598080 | 9.80x10 <sup>-07</sup> | -0.79 | Thyroid                               |
| ENSG00000204531.11 | <i>POU5F1</i>            | 6_31255442_G_A_b37 | rs114598080 | 1.20x10 <sup>-06</sup> | -0.72 | Muscle - Skeletal                     |
| ENSG00000204531.11 | <i>POU5F1</i>            | 6_31255442_G_A_b37 | rs114598080 | 2.20x10 <sup>-06</sup> | -0.65 | Adipose - Subcutaneous                |
| ENSG00000204531.11 | <i>POU5F1</i>            | 6_31255442_G_A_b37 | rs114598080 | 2.30x10 <sup>-06</sup> | -0.77 | Adipose - Visceral (Omentum)          |
| ENSG00000204531.11 | <i>POU5F1</i>            | 6_31255442_G_A_b37 | rs114598080 | 3.10x10 <sup>-06</sup> | -0.71 | Skin - Not Sun Exposed (Suprapubic)   |
| ENSG00000137310.7  | <i>TCF19</i>             | 6_31255442_G_A_b37 | rs114598080 | 3.40x10 <sup>-06</sup> | -0.57 | Skin - Not Sun Exposed (Suprapubic)   |
| ENSG00000204528.3  | <i>PSORS1C3</i>          | 6_31255442_G_A_b37 | rs114598080 | 3.50x10 <sup>-06</sup> | -0.97 | Artery - Aorta                        |
| ENSG00000204531.11 | <i>POU5F1</i>            | 6_31255442_G_A_b37 | rs114598080 | 4.00x10 <sup>-06</sup> | -0.69 | Lung                                  |
| ENSG00000204536.9  | <i>CCHCR1</i>            | 6_31255442_G_A_b37 | rs114598080 | 6.80x10 <sup>-06</sup> | -0.42 | Artery - Tibial                       |
| ENSG00000204531.11 | <i>POU5F1</i>            | 6_31255442_G_A_b37 | rs114598080 | 7.20x10 <sup>-06</sup> | -0.74 | Esophagus - Mucosa                    |
| ENSG00000204531.11 | <i>POU5F1</i>            | 6_31255442_G_A_b37 | rs114598080 | 1.60x10 <sup>-05</sup> | -0.77 | Artery - Aorta                        |
| ENSG00000137310.7  | <i>TCF19</i>             | 6_31255442_G_A_b37 | rs114598080 | 1.80x10 <sup>-05</sup> | -0.42 | Artery - Tibial                       |
| ENSG00000204531.11 | <i>POU5F1</i>            | 6_31255442_G_A_b37 | rs114598080 | 2.00x10 <sup>-05</sup> | -0.75 | Liver                                 |
| ENSG00000204531.11 | <i>POU5F1</i>            | 6_31255442_G_A_b37 | rs114598080 | 2.10x10 <sup>-05</sup> | -0.8  | Esophagus - Gastroesophageal Junction |
| ENSG00000204536.9  | <i>CCHCR1</i>            | 6_31255442_G_A_b37 | rs114598080 | 2.50x10 <sup>-05</sup> | -0.42 | Skin - Sun Exposed (Lower leg)        |
| ENSG00000204536.9  | <i>CCHCR1</i>            | 6_31255442_G_A_b37 | rs114598080 | 2.80x10 <sup>-05</sup> | -0.51 | Skin - Not Sun Exposed (Suprapubic)   |
| ENSG00000204531.11 | <i>POU5F1</i>            | 6_31255442_G_A_b37 | rs114598080 | 3.30x10 <sup>-05</sup> | -0.77 | Esophagus - Muscularis                |
| ENSG00000204536.9  | <i>CCHCR1</i>            | 6_31255442_G_A_b37 | rs114598080 | 3.60x10 <sup>-05</sup> | -0.36 | Adipose - Visceral (Omentum)          |
| ENSG00000204531.11 | <i>POU5F1</i>            | 6_31255442_G_A_b37 | rs114598080 | 6.00x10 <sup>-05</sup> | -0.6  | Heart - Atrial Appendage              |
| ENSG00000204528.3  | <i>PSORS1C3</i>          | 6_31255442_G_A_b37 | rs114598080 | 6.30x10 <sup>-05</sup> | -0.69 | Lung                                  |
| ENSG00000272221.1  | <i>XXbac-BPG181B23.7</i> | 6_31255442_G_A_b37 | rs114598080 | 8.40x10 <sup>-05</sup> | 0.66  | Artery - Tibial                       |

Table S11. Single-Tissue eQTL for rs1265048 in the GTEx project

| Gencode Id         | Gene Symbol               | Variant Id         | SNP Id    | P-Value                | NES   | Tissue                              |
|--------------------|---------------------------|--------------------|-----------|------------------------|-------|-------------------------------------|
| ENSG00000137411.12 | <i>VARS2</i>              | 6_31081409_T_C_b37 | rs1265048 | 6.10x10 <sup>-15</sup> | 0.38  | Thyroid                             |
| ENSG00000272501.1  | <i>XXbac-BPG299F13.17</i> | 6_31081409_T_C_b37 | rs1265048 | 3.00x10 <sup>-09</sup> | 0.27  | Thyroid                             |
| ENSG00000206344.6  | <i>HCG27</i>              | 6_31081409_T_C_b37 | rs1265048 | 3.80x10 <sup>-09</sup> | 0.25  | Lung                                |
| ENSG00000231402.1  | <i>WASF5P</i>             | 6_31081409_T_C_b37 | rs1265048 | 1.60x10 <sup>-08</sup> | -0.5  | Pancreas                            |
| ENSG00000137411.12 | <i>VARS2</i>              | 6_31081409_T_C_b37 | rs1265048 | 1.70x10 <sup>-08</sup> | 0.32  | Stomach                             |
| ENSG00000137411.12 | <i>VARS2</i>              | 6_31081409_T_C_b37 | rs1265048 | 2.20x10 <sup>-08</sup> | 0.39  | Pancreas                            |
| ENSG00000137411.12 | <i>VARS2</i>              | 6_31081409_T_C_b37 | rs1265048 | 4.00x10 <sup>-08</sup> | 0.27  | Esophagus - Muscularis              |
| ENSG00000206344.6  | <i>HCG27</i>              | 6_31081409_T_C_b37 | rs1265048 | 4.30x10 <sup>-08</sup> | 0.31  | Nerve - Tibial                      |
| ENSG00000137411.12 | <i>VARS2</i>              | 6_31081409_T_C_b37 | rs1265048 | 5.20x10 <sup>-08</sup> | 0.31  | Skin - Sun Exposed (Lower leg)      |
| ENSG00000272501.1  | <i>XXbac-BPG299F13.17</i> | 6_31081409_T_C_b37 | rs1265048 | 8.90x10 <sup>-08</sup> | 0.31  | Nerve - Tibial                      |
| ENSG00000137411.12 | <i>VARS2</i>              | 6_31081409_T_C_b37 | rs1265048 | 9.60x10 <sup>-08</sup> | 0.3   | Nerve - Tibial                      |
| ENSG00000206344.6  | <i>HCG27</i>              | 6_31081409_T_C_b37 | rs1265048 | 1.10x10 <sup>-07</sup> | 0.31  | Colon - Transverse                  |
| ENSG00000206344.6  | <i>HCG27</i>              | 6_31081409_T_C_b37 | rs1265048 | 1.20x10 <sup>-07</sup> | 0.21  | Thyroid                             |
| ENSG00000206344.6  | <i>HCG27</i>              | 6_31081409_T_C_b37 | rs1265048 | 1.70x10 <sup>-07</sup> | 0.32  | Skin - Not Sun Exposed (Suprapubic) |
| ENSG00000206344.6  | <i>HCG27</i>              | 6_31081409_T_C_b37 | rs1265048 | 1.90x10 <sup>-07</sup> | 0.22  | Esophagus - Muscularis              |
| ENSG00000206344.6  | <i>HCG27</i>              | 6_31081409_T_C_b37 | rs1265048 | 2.10x10 <sup>-07</sup> | 0.23  | Artery - Tibial                     |
| ENSG00000137411.12 | <i>VARS2</i>              | 6_31081409_T_C_b37 | rs1265048 | 2.40x10 <sup>-07</sup> | 0.35  | Heart - Left Ventricle              |
| ENSG00000206344.6  | <i>HCG27</i>              | 6_31081409_T_C_b37 | rs1265048 | 3.30x10 <sup>-07</sup> | 0.15  | Whole Blood                         |
| ENSG00000206344.6  | <i>HCG27</i>              | 6_31081409_T_C_b37 | rs1265048 | 4.70x10 <sup>-07</sup> | 0.31  | Colon - Sigmoid                     |
| ENSG00000137411.12 | <i>VARS2</i>              | 6_31081409_T_C_b37 | rs1265048 | 6.00x10 <sup>-07</sup> | 0.35  | Colon - Transverse                  |
| ENSG00000272501.1  | <i>XXbac-BPG299F13.17</i> | 6_31081409_T_C_b37 | rs1265048 | 6.50x10 <sup>-07</sup> | 0.25  | Esophagus - Mucosa                  |
| ENSG00000206344.6  | <i>HCG27</i>              | 6_31081409_T_C_b37 | rs1265048 | 0.0000011              | 0.26  | Adipose - Subcutaneous              |
| ENSG00000137411.12 | <i>VARS2</i>              | 6_31081409_T_C_b37 | rs1265048 | 0.0000011              | 0.24  | Lung                                |
| ENSG00000240053.8  | <i>LY6G5B</i>             | 6_31081409_T_C_b37 | rs1265048 | 0.0000012              | -0.11 | Lung                                |
| ENSG00000137411.12 | <i>VARS2</i>              | 6_31081409_T_C_b37 | rs1265048 | 0.0000014              | 0.24  | Artery - Tibial                     |
| ENSG00000137411.12 | <i>VARS2</i>              | 6_31081409_T_C_b37 | rs1265048 | 0.0000018              | 0.28  | Skin - Not Sun Exposed (Suprapubic) |
| ENSG00000137411.12 | <i>VARS2</i>              | 6_31081409_T_C_b37 | rs1265048 | 0.0000019              | 0.32  | Breast - Mammary Tissue             |
| ENSG00000206344.6  | <i>HCG27</i>              | 6_31081409_T_C_b37 | rs1265048 | 0.000003               | 0.23  | Cells - Transformed fibroblasts     |

| <b>Gencode Id</b>  | <b>Gene Symbol</b>        | <b>Variant Id</b>  | <b>SNP Id</b> | <b>P-Value</b> | <b>NES</b> | <b>Tissue</b>                         |
|--------------------|---------------------------|--------------------|---------------|----------------|------------|---------------------------------------|
| ENSG00000137310.7  | <i>TCF19</i>              | 6_31081409_T_C_b37 | rs1265048     | 0.0000031      | 0.36       | Pancreas                              |
| ENSG00000137411.12 | <i>VAR52</i>              | 6_31081409_T_C_b37 | rs1265048     | 0.0000031      | 0.4        | Adrenal Gland                         |
| ENSG00000272501.1  | <i>XXbac-BPG299F13.17</i> | 6_31081409_T_C_b37 | rs1265048     | 0.0000035      | 0.24       | Skin - Sun Exposed (Lower leg)        |
| ENSG00000137411.12 | <i>VAR52</i>              | 6_31081409_T_C_b37 | rs1265048     | 0.0000045      | 0.25       | Adipose - Subcutaneous                |
| ENSG00000137411.12 | <i>VAR52</i>              | 6_31081409_T_C_b37 | rs1265048     | 0.0000049      | 0.3        | Artery - Aorta                        |
| ENSG00000137411.12 | <i>VAR52</i>              | 6_31081409_T_C_b37 | rs1265048     | 0.0000055      | 0.37       | Pituitary                             |
| ENSG00000204540.6  | <i>PSORS1C1</i>           | 6_31081409_T_C_b37 | rs1265048     | 0.0000061      | 0.41       | Heart - Left Ventricle                |
| ENSG00000137411.12 | <i>VAR52</i>              | 6_31081409_T_C_b37 | rs1265048     | 0.000013       | 0.28       | Esophagus - Gastroesophageal Junction |
| ENSG00000204525.10 | <i>HLA-C</i>              | 6_31081409_T_C_b37 | rs1265048     | 0.000013       | -0.33      | Pancreas                              |
| ENSG00000204540.6  | <i>PSORS1C1</i>           | 6_31081409_T_C_b37 | rs1265048     | 0.000019       | 0.35       | Heart - Atrial Appendage              |
| ENSG00000206344.6  | <i>HCG27</i>              | 6_31081409_T_C_b37 | rs1265048     | 0.000021       | 0.38       | Brain - Cerebellum                    |
| ENSG00000137411.12 | <i>VAR52</i>              | 6_31081409_T_C_b37 | rs1265048     | 0.000023       | 0.16       | Esophagus - Mucosa                    |
| ENSG00000206344.6  | <i>HCG27</i>              | 6_31081409_T_C_b37 | rs1265048     | 0.000025       | 0.17       | Muscle - Skeletal                     |
| ENSG00000204531.11 | <i>POU5F1</i>             | 6_31081409_T_C_b37 | rs1265048     | 0.000028       | -0.27      | Heart - Left Ventricle                |
| ENSG00000206344.6  | <i>HCG27</i>              | 6_31081409_T_C_b37 | rs1265048     | 0.000034       | 0.24       | Adipose - Visceral (Omentum)          |
| ENSG00000206344.6  | <i>HCG27</i>              | 6_31081409_T_C_b37 | rs1265048     | 0.000034       | 0.25       | Stomach                               |
| ENSG00000206344.6  | <i>HCG27</i>              | 6_31081409_T_C_b37 | rs1265048     | 0.000035       | 0.29       | Testis                                |
| ENSG00000272501.1  | <i>XXbac-BPG299F13.17</i> | 6_31081409_T_C_b37 | rs1265048     | 0.000036       | 0.26       | Skin - Not Sun Exposed (Suprapubic)   |
| ENSG00000204531.11 | <i>POU5F1</i>             | 6_31081409_T_C_b37 | rs1265048     | 0.000036       | -0.3       | Heart - Atrial Appendage              |
| ENSG00000272501.1  | <i>XXbac-BPG299F13.17</i> | 6_31081409_T_C_b37 | rs1265048     | 0.000046       | 0.17       | Muscle - Skeletal                     |
| ENSG00000206344.6  | <i>HCG27</i>              | 6_31081409_T_C_b37 | rs1265048     | 0.000046       | 0.23       | Skin - Sun Exposed (Lower leg)        |
| ENSG00000272501.1  | <i>XXbac-BPG299F13.17</i> | 6_31081409_T_C_b37 | rs1265048     | 0.00005        | 0.23       | Artery - Tibial                       |
| ENSG00000204528.3  | <i>PSORS1C3</i>           | 6_31081409_T_C_b37 | rs1265048     | 0.000051       | 0.22       | Whole Blood                           |
| ENSG00000137411.12 | <i>VAR52</i>              | 6_31081409_T_C_b37 | rs1265048     | 0.000061       | 0.18       | Cells - Transformed fibroblasts       |
| ENSG00000229836.1  | <i>XXbac-BPG248L24.10</i> | 6_31081409_T_C_b37 | rs1265048     | 0.000082       | -0.27      | Thyroid                               |
| ENSG00000204525.10 | <i>HLA-C</i>              | 6_31081409_T_C_b37 | rs1265048     | 0.000097       | -0.21      | Muscle - Skeletal                     |
| ENSG00000204528.3  | <i>PSORS1C3</i>           | 6_31081409_T_C_b37 | rs1265048     | 0.0001         | 0.25       | Muscle - Skeletal                     |
| ENSG00000137310.7  | <i>TCF19</i>              | 6_31081409_T_C_b37 | rs1265048     | 0.00013        | 0.15       | Muscle - Skeletal                     |

NES = normalized effect size computed as the effect of the alternative allele relative to the reference allele in the human genome reference (hg19)

Figure S1. Principal component analysis of the GWAS discovery sample with all 1000 genomes phase 3 samples (A) and with the East-Asian 1000 genomes samples (B)

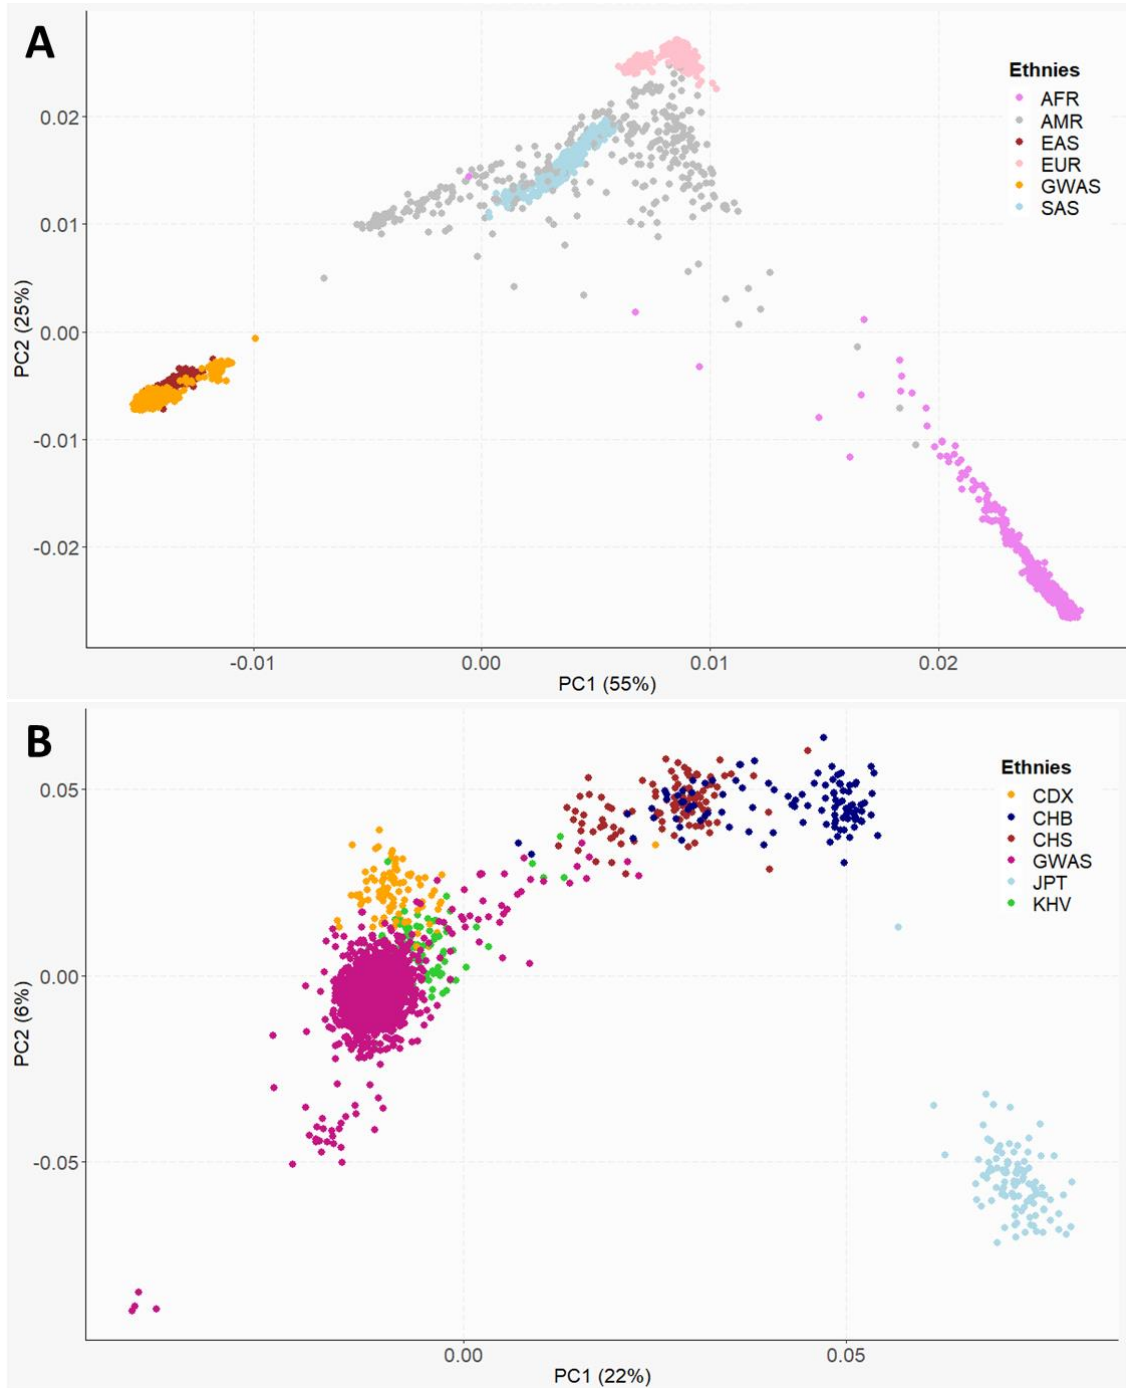

AFR = African; AMR = American; EAS = East Asian; EUR = European; GWAS = Genome-wide association study samples; SAS = South Asian; CDX = Chinese Dai in Xishuangbanna, China; CHB = Han Chinese in Beijing, China; CHS = Southern Han Chinese; JPT = Japanese in Tokyo, Japan; KHV = Kinh in Ho Chi Minh City, Vietnam

Figure S2. Quantile-quantile plot of the association results with leprosy *per se* in the family-based GWAS for all SNPs (black) and all SNPs outside the HLA region (grey)

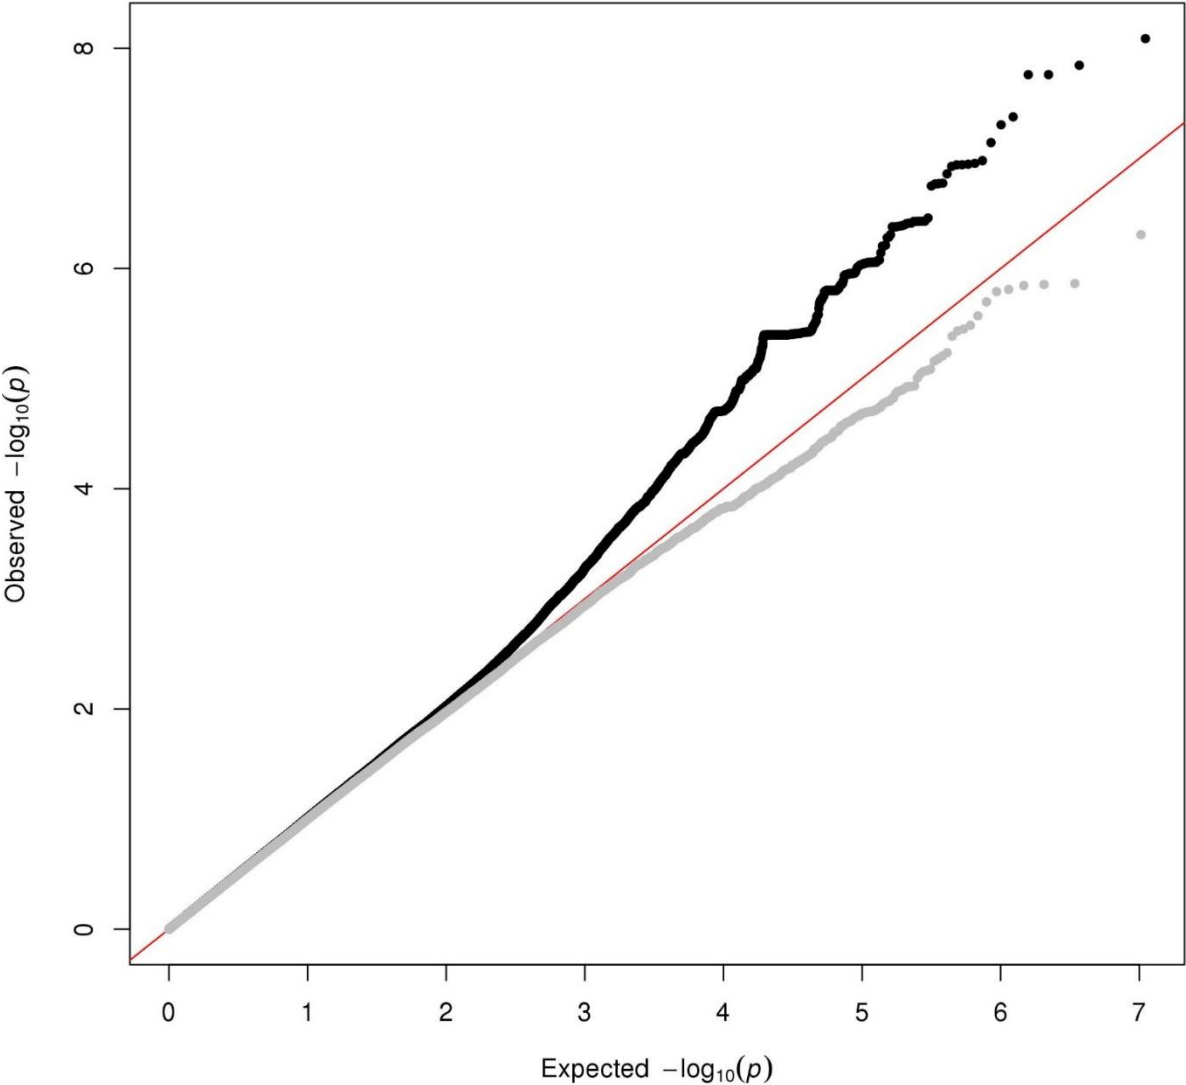



## Reference

1. Zhang F, Liu H, Chen S, Low H, Sun L, Cui Y, et al. Identification of two new loci at IL23R and RAB32 that influence susceptibility to leprosy. *Nat Genet.* 2011;43(12):1247-51.
2. Liu H, Wang Z, Li Y, Yu G, Fu X, Wang C, et al. Genome-Wide Analysis of Protein-Coding Variants in Leprosy. *J Invest Dermatol.* 2017;137(12):2544-51.
3. Liu H, Bao F, Irwanto A, Fu X, Lu N, Yu G, et al. An association study of TOLL and CARD with leprosy susceptibility in Chinese population. *Hum Mol Genet.* 2013;22(21):4430-7.
4. Liu H, Irwanto A, Fu X, Yu G, Yu Y, Sun Y, et al. Discovery of six new susceptibility loci and analysis of pleiotropic effects in leprosy. *Nat Genet.* 2015;47(3):267-71.
5. Liu H, Irwanto A, Tian H, Fu X, Yu Y, Yu G, et al. Identification of IL18RAP/IL18R1 and IL12B as leprosy risk genes demonstrates shared pathogenesis between inflammation and infectious diseases. *Am J Hum Genet.* 2012;91(5):935-41.
6. Wang Z, Sun Y, Fu X, Yu G, Wang C, Bao F, et al. A large-scale genome-wide association and meta-analysis identified four novel susceptibility loci for leprosy. *Nat Commun.* 2016;7:13760.
7. Wong SH, Gochhait S, Malhotra D, Pettersson FH, Teo YY, Khor CC, et al. Leprosy and the adaptation of human toll-like receptor 1. *PLoS Pathog.* 2010;6:e1000979.
8. Wang Z, Mi Z, Wang H, Sun L, Yu G, Fu X, et al. Discovery of 4 exonic and 1 intergenic novel susceptibility loci for leprosy. *Clin Genet.* 2018;94(2):259-63.
9. Zhang FR, Huang W, Chen SM, Sun LD, Liu H, Li Y, et al. Genomewide association study of leprosy. *N Engl J Med.* 2009;361(27):2609-18.
10. Wang D, Fan Y, Malhi M, Bi R, Wu Y, Xu M, et al. Missense Variants in HIF1A and LACC1 Contribute to Leprosy Risk in Han Chinese. *Am J Hum Genet.* 2018;102(5):794-805.
